# Supplementary material for: TBProfiler for automated calling of the association with drug resistance of variants in Mycobacterium tuberculosis
Source: PLoS One. 2022 Dec 30;17(12):e0279644. doi: 10.1371/journal.pone.0279644 (PMC9803136; doi:10.1371/journal.pone.0279644)
Supplement: S1 File — (CSV) [file pone.0279644.s002.csv]

gene		mmpL5	mmpL5	mmpS5	Rv1979c	Rv1979c	mmpL5	mmpL5	Rv1979c	mmpS5	mmpS5	Rv1979c	mmpL5	Rv1979c	mmpL5	pepQ	mmpR5	pepQ	mmpR5	pepQ	mmpL5	Rv1979c	mmpL5	mmpL5	mmpL5	mmpS5	Rv1979c	rrs	rrs	fprA	aftB	whiB6	ccsA	eis	rrs	whiB6	rrs	rrs	rrs	rrs	rrs	rrs	rrs	rrs	rrs	rrs	rrs	rrs	rrs
variant		mmpL5_p.Ile948Val	mmpL5_p.Thr794Ile	mmpS5_c.-710C>G	Rv1979c_p.Arg409Gln	Rv1979c_c.-129A>G	mmpL5_p.Asp767Asn	mmpL5_p.Trp598Arg	Rv1979c_p.Tyr51Asn	mmpS5_c.-74G>T	mmpS5_c.-720G>A	Rv1979c_p.Asp286Gly	mmpL5_c.1065G>T	Rv1979c_p.Glu38Asp	mmpL5_p.Val247Ala	pepQ_c.-118A>G	mmpR5_p.Arg140Trp	pepQ_p.Gly116Val	mmpR5_p.Glu138Gly	pepQ_p.Ala64Thr	mmpL5_p.Pro595Ser	Rv1979c_c.-147G>A	mmpL5_c.-120C>T	mmpL5_c.2661G>T	mmpL5_c.1161C>G	mmpS5_c.-703_-702delAC	Rv1979c_p.Ile394Thr	rrs_n.1401A>G	rrs_n.-187C>T	fprA_c.-11_-10insA	aftB_p.Asp397Gly	whiB6_c.-75delG	ccsA_p.Ile245Met	eis_p.Val163Ile	rrs_n.492C>T	whiB6_c.138C>T	rrs_n.897C>T	rrs_n.909G>T	rrs_n.1112C>T	rrs_n.1137G>A	rrs_n.1144G>T	rrs_n.1148G>T	rrs_n.1155G>A	rrs_n.1157G>T	rrs_n.1159T>A	rrs_n.1175T>C	rrs_n.1181T>C	rrs_n.1321G>A	rrs_n.1332G>A
position		775639	776100	779615	2221939	2223293	776182	776689	2223014	778979	779625	2222308	777416	2223051	777741	2860536	779407	2860072	779402	2860229	776698	2223311	778600	775820	777320	779606	2221984	1473246	1471659	3473996	4267647	4338595	620625	2714846	1472337	4338384	1472742	1472754	1472957	1472982	1472989	1472993	1473000	1473002	1473004	1473020	1473026	1473166	1473177
lineage	sample
lineage1.2.2.1	EXIT-RIF.EC347-424	Sensitive	Sensitive			Sensitive						Unclassified									Unclassified								Unclassified	Unclassified		Sensitive
lineage1.2.2.1	EXIT-RIF.GA532-278	Sensitive	Sensitive			Sensitive						Unclassified																	Unclassified	Unclassified		Sensitive
lineage1.2.2.1	EXIT-RIF.GA329-414	Sensitive	Sensitive			Sensitive						Unclassified																	Unclassified	Unclassified		Sensitive
lineage1.2.2.1	EXIT-RIF.GA525-249	Sensitive	Sensitive			Sensitive						Unclassified																	Unclassified	Unclassified		Sensitive
lineage1.2.2.2	EXIT-RIF.GA061-194	Sensitive	Sensitive			Sensitive					Unclassified	Unclassified																	Unclassified	Unclassified		Sensitive
lineage1.2.2	EXIT-RIF.GA012-49	Sensitive	Sensitive			Sensitive					Unclassified	Unclassified																	Unclassified	Unclassified		Sensitive
lineage1.2.2	EXIT-RIF.GA010-47	Sensitive	Sensitive			Sensitive					Unclassified	Unclassified																	Unclassified	Unclassified		Sensitive
lineage1.2.2.2	EXIT-RIF.EC116-298	Sensitive	Sensitive			Sensitive					Unclassified	Unclassified																	Unclassified	Unclassified		Sensitive
lineage1.2.2.2	EXIT-RIF.FS063-238	Sensitive	Sensitive			Sensitive					Unclassified	Unclassified																	Unclassified	Unclassified		Sensitive
lineage1.2.2.2	EXIT-RIF.FS351-471	Sensitive	Sensitive			Sensitive					Unclassified	Unclassified																	Unclassified	Unclassified		Sensitive
lineage1.2.2.2	EXIT-RIF.FS519-287	Sensitive	Sensitive			Sensitive					Unclassified	Unclassified																	Unclassified	Unclassified		Sensitive
lineage1.2.2.2	EXIT-RIF.FS338-469	Sensitive	Sensitive			Sensitive					Unclassified	Unclassified																	Unclassified	Unclassified		Sensitive
lineage1.2.2.2	EXIT-RIF.FS585-376	Sensitive	Sensitive			Sensitive					Unclassified	Unclassified																	Unclassified	Unclassified		Sensitive
lineage1.2.2.2	EXIT-RIF.GA041-123	Sensitive	Sensitive			Sensitive					Unclassified	Unclassified																	Unclassified	Unclassified		Sensitive
lineage1.2.2.2	EXIT-RIF.GA360-451	Sensitive	Sensitive			Sensitive					Unclassified	Unclassified																	Unclassified	Unclassified		Sensitive
lineage1.1.3.2	EXIT-RIF.GA036-64	Sensitive	Sensitive			Sensitive						Unclassified															Unclassified		Unclassified	Unclassified		Sensitive
lineage2.2.2	EXIT-RIF.EC569A-388	Sensitive	Sensitive	Unclassified	Unclassified	Sensitive																						Resistant	Unclassified	Unclassified	Sensitive	Sensitive
lineage2.2.2	EXIT-RIF.EC569B-343	Sensitive	Sensitive	Unclassified	Unclassified	Sensitive																						Resistant	Unclassified	Unclassified	Sensitive	Sensitive
lineage2.2.2	EXIT-RIF.EC589A-352	Sensitive	Sensitive	Unclassified	Unclassified	Sensitive																							Unclassified	Unclassified	Sensitive	Sensitive
lineage2.2.2	EXIT-RIF.GA074-226	Sensitive	Sensitive	Unclassified	Unclassified	Sensitive																							Unclassified	Unclassified	Sensitive	Sensitive
lineage2.2.2	EXIT-RIF.GA331-415	Sensitive	Sensitive	Unclassified	Unclassified	Sensitive																							Unclassified	Unclassified	Sensitive	Sensitive
lineage2.2.2	EXIT-RIF.EC043-106	Sensitive	Sensitive	Unclassified	Unclassified	Sensitive																							Unclassified	Unclassified	Sensitive	Sensitive
lineage2.2.2	EXIT-RIF.EC050-112	Sensitive	Sensitive	Unclassified	Unclassified	Sensitive																						Resistant	Unclassified	Unclassified	Sensitive	Sensitive
lineage2.2.2	EXIT-RIF.FS309-439	Sensitive	Sensitive	Unclassified	Unclassified	Sensitive																						Resistant	Unclassified	Unclassified	Sensitive	Sensitive
lineage2.2.2	EXIT-RIF.EC031A-219	Sensitive	Sensitive	Unclassified	Unclassified	Sensitive																						Resistant	Unclassified	Unclassified	Sensitive	Sensitive
lineage2.2.2	EXIT-RIF.EC303-392	Sensitive	Sensitive	Unclassified	Unclassified	Sensitive																						Resistant	Unclassified	Unclassified	Sensitive	Sensitive
lineage2.2.2	EXIT-RIF.EC098-217	Sensitive	Sensitive	Unclassified	Unclassified	Sensitive																						Resistant	Unclassified	Unclassified	Sensitive	Sensitive
lineage2.2.2	EXIT-RIF.EC098A-273	Sensitive	Sensitive	Unclassified	Unclassified	Sensitive																						Resistant	Unclassified	Unclassified	Sensitive	Sensitive
lineage2.2.2	EXIT-RIF.EC040-103	Sensitive	Sensitive	Unclassified	Unclassified	Sensitive																							Unclassified	Unclassified	Sensitive	Sensitive
lineage2.2.2	EXIT-RIF.EC583-390	Sensitive	Sensitive	Unclassified	Unclassified	Sensitive																							Unclassified	Unclassified	Sensitive	Sensitive
lineage2.2.2	EXIT-RIF.EC110-262	Sensitive	Sensitive	Unclassified	Unclassified	Sensitive																							Unclassified	Unclassified	Sensitive	Sensitive
lineage2.2.2	EXIT-RIF.EC046-108	Sensitive	Sensitive	Unclassified	Unclassified	Sensitive																							Unclassified	Unclassified	Sensitive	Sensitive
lineage2.2.2	EXIT-RIF.EC338B-422	Sensitive	Sensitive	Unclassified	Unclassified	Sensitive																							Unclassified	Unclassified	Sensitive	Sensitive
lineage2.2.2	EXIT-RIF.GA050-131	Sensitive	Sensitive	Unclassified	Unclassified	Sensitive																						Resistant	Unclassified	Unclassified	Sensitive	Sensitive
lineage2.2.2	EXIT-RIF.EC069-177	Sensitive	Sensitive	Unclassified	Unclassified	Sensitive																						Resistant	Unclassified	Unclassified	Sensitive	Sensitive
lineage2.2.2	EXIT-RIF.EC084-203	Sensitive	Sensitive	Unclassified	Unclassified	Sensitive																						Resistant	Unclassified	Unclassified	Sensitive	Sensitive
lineage2.2.2	EXIT-RIF.EC108-260	Sensitive	Sensitive	Unclassified	Unclassified	Sensitive																						Resistant	Unclassified	Unclassified	Sensitive	Sensitive
lineage2.2.2	EXIT-RIF.EC091-210	Sensitive	Sensitive	Unclassified	Unclassified	Sensitive																						Resistant	Unclassified	Unclassified	Sensitive	Sensitive
lineage2.2.2	EXIT-RIF.FS595A-381	Sensitive	Sensitive	Unclassified	Unclassified	Sensitive																						Resistant	Unclassified	Unclassified	Sensitive	Sensitive
lineage2.2.2	EXIT-RIF.EC385A-462	Sensitive	Sensitive	Unclassified	Unclassified	Sensitive																						Resistant	Unclassified	Unclassified	Sensitive	Sensitive
lineage2.2.2	EXIT-RIF.EC385B-463	Sensitive	Sensitive	Unclassified	Unclassified	Sensitive																						Resistant	Unclassified	Unclassified	Sensitive	Sensitive
lineage2.2.2	EXIT-RIF.EC093-212	Sensitive	Sensitive	Unclassified	Unclassified	Sensitive																						Resistant	Unclassified	Unclassified	Sensitive	Sensitive
lineage2.2.2	EXIT-RIF.EC099-218	Sensitive	Sensitive	Unclassified	Unclassified	Sensitive																						Resistant	Unclassified	Unclassified	Sensitive	Sensitive
lineage2.2.2	EXIT-RIF.EC056-164	Sensitive	Sensitive	Unclassified	Unclassified	Sensitive																						Resistant	Unclassified	Unclassified	Sensitive	Sensitive
lineage2.2.2	EXIT-RIF.EC063-171	Sensitive	Sensitive	Unclassified	Unclassified	Sensitive																						Resistant	Unclassified	Unclassified	Sensitive	Sensitive
lineage2.2.2	EXIT-RIF.EC042-105	Sensitive	Sensitive	Unclassified	Unclassified	Sensitive																						Resistant	Unclassified	Unclassified	Sensitive	Sensitive
lineage2.2.2	EXIT-RIF.EC549-328	Sensitive	Sensitive	Unclassified	Unclassified	Sensitive																						Resistant	Unclassified	Unclassified	Sensitive	Sensitive
lineage2.2.2	EXIT-RIF.EC021-32	Sensitive	Sensitive	Unclassified	Unclassified	Sensitive																						Resistant	Unclassified	Unclassified	Sensitive	Sensitive
lineage2.2.2	EXIT-RIF.EC109-261	Sensitive	Sensitive	Unclassified	Unclassified	Sensitive																						Resistant	Unclassified	Unclassified	Sensitive	Sensitive
lineage2.2.2	EXIT-RIF.EC557-334	Sensitive	Sensitive	Unclassified	Unclassified	Sensitive																						Resistant	Unclassified	Unclassified	Sensitive	Sensitive
lineage2.2.2	EXIT-RIF.EC015-27	Sensitive	Sensitive	Unclassified	Unclassified	Sensitive																						Resistant	Unclassified	Unclassified	Sensitive	Sensitive
lineage2.2.2	EXIT-RIF.EC011-2-37	Sensitive	Sensitive	Unclassified	Unclassified	Sensitive																						Resistant	Unclassified	Unclassified	Sensitive	Sensitive
lineage2.2.2	EXIT-RIF.EC011-23	Sensitive	Sensitive	Unclassified	Unclassified	Sensitive																						Resistant	Unclassified	Unclassified	Sensitive	Sensitive
lineage2.2.2	EXIT-RIF.EC049-111	Sensitive	Sensitive	Unclassified	Unclassified	Sensitive																						Resistant	Unclassified	Unclassified	Sensitive	Sensitive
lineage2.2.2	EXIT-RIF.EC017-29	Sensitive	Sensitive	Unclassified	Unclassified	Sensitive																						Resistant	Unclassified	Unclassified	Sensitive	Sensitive
lineage2.2.2	EXIT-RIF.EC026-90	Sensitive	Sensitive	Unclassified	Unclassified	Sensitive																						Resistant	Unclassified	Unclassified	Sensitive	Sensitive
lineage2.2.2	EXIT-RIF.EC096-215	Sensitive	Sensitive	Unclassified	Unclassified	Sensitive																						Resistant	Unclassified	Unclassified	Sensitive	Sensitive
lineage2.2.2	EXIT-RIF.EC358-427	Sensitive	Sensitive	Unclassified	Unclassified	Sensitive																						Resistant	Unclassified	Unclassified	Sensitive	Sensitive
lineage2.2.2	EXIT-RIF.EC023-34	Sensitive	Sensitive	Unclassified	Unclassified	Sensitive																						Resistant	Unclassified	Unclassified	Sensitive	Sensitive
lineage2.2.2	EXIT-RIF.EC105-257	Sensitive	Sensitive	Unclassified	Unclassified	Sensitive																						Resistant	Unclassified	Unclassified	Sensitive	Sensitive
lineage2.2.2	EXIT-RIF.EC057-165	Sensitive	Sensitive	Unclassified	Unclassified	Sensitive																						Resistant	Unclassified	Unclassified	Sensitive	Sensitive
lineage2.2.2	EXIT-RIF.EC058-166	Sensitive	Sensitive	Unclassified	Unclassified	Sensitive																						Resistant	Unclassified	Unclassified	Sensitive	Sensitive
lineage2.2.2	EXIT-RIF.EC025-36	Sensitive	Sensitive	Unclassified	Unclassified	Sensitive																						Resistant	Unclassified	Unclassified	Sensitive	Sensitive
lineage2.2.2	EXIT-RIF.EC010A-268	Sensitive	Sensitive	Unclassified	Unclassified	Sensitive																						Resistant	Unclassified	Unclassified	Sensitive	Sensitive
lineage2.2.2	EXIT-RIF.EC077-185	Sensitive	Sensitive	Unclassified	Unclassified	Sensitive																						Resistant	Unclassified	Unclassified	Sensitive	Sensitive
lineage2.2.2	EXIT-RIF.EC100-252	Sensitive	Sensitive	Unclassified	Unclassified	Sensitive																						Resistant	Unclassified	Unclassified	Sensitive	Sensitive
lineage2.2.2	EXIT-RIF.EC310-396	Sensitive	Sensitive	Unclassified	Unclassified	Sensitive																						Resistant	Unclassified	Unclassified	Sensitive	Sensitive
lineage2.2.2	EXIT-RIF.GA045-126	Sensitive	Sensitive	Unclassified	Unclassified	Sensitive																						Resistant	Unclassified	Unclassified	Sensitive	Sensitive
lineage2.2.2	EXIT-RIF.GA517-235	Sensitive	Sensitive	Unclassified	Unclassified	Sensitive																						Resistant	Unclassified	Unclassified	Sensitive	Sensitive
lineage2.2.2	EXIT-RIF.EC072B-272	Sensitive	Sensitive	Unclassified	Unclassified	Sensitive																						Resistant	Unclassified	Unclassified	Sensitive	Sensitive
lineage2.2.2	EXIT-RIF.EC052-114	Sensitive	Sensitive	Unclassified	Unclassified	Sensitive																						Resistant	Unclassified	Unclassified	Sensitive	Sensitive
lineage2.2.2	EXIT-RIF.EC378-454	Sensitive	Sensitive	Unclassified	Unclassified	Sensitive																						Resistant	Unclassified	Unclassified	Sensitive	Sensitive
lineage2.2.2	EXIT-RIF.EC386B-464	Sensitive	Sensitive	Unclassified	Unclassified	Sensitive																						Resistant	Unclassified	Unclassified	Sensitive	Sensitive
lineage2.2.2	EXIT-RIF.EC020-31	Sensitive	Sensitive	Unclassified	Unclassified	Sensitive																						Resistant	Unclassified	Unclassified	Sensitive	Sensitive
lineage2.2.2	EXIT-RIF.EC039-102	Sensitive	Sensitive	Unclassified	Unclassified	Sensitive																						Resistant	Unclassified	Unclassified	Sensitive	Sensitive
lineage2.2.2	EXIT-RIF.EC062-170	Sensitive	Sensitive	Unclassified	Unclassified	Sensitive																						Resistant	Unclassified	Unclassified	Sensitive	Sensitive
lineage2.2.2	EXIT-RIF.EC072-180	Sensitive	Sensitive	Unclassified	Unclassified	Sensitive																						Resistant	Unclassified	Unclassified	Sensitive	Sensitive
lineage2.2.2	EXIT-RIF.EC070-178	Sensitive	Sensitive	Unclassified	Unclassified	Sensitive																						Resistant	Unclassified	Unclassified	Sensitive	Sensitive
lineage2.2.2	EXIT-RIF.EC097-216	Sensitive	Sensitive	Unclassified	Unclassified	Sensitive																						Resistant	Unclassified	Unclassified	Sensitive	Sensitive
lineage2.2.2	EXIT-RIF.EC016-28	Sensitive	Sensitive	Unclassified	Unclassified	Sensitive																						Resistant	Unclassified	Unclassified	Sensitive	Sensitive
lineage2.2.2	EXIT-RIF.EC115-267	Sensitive	Sensitive	Unclassified	Unclassified	Sensitive																						Resistant	Unclassified	Unclassified	Sensitive	Sensitive
lineage2.2.2	EXIT-RIF.EC580-349	Sensitive	Sensitive	Unclassified	Unclassified	Sensitive																						Resistant	Unclassified	Unclassified	Sensitive	Sensitive
lineage2.2.2	EXIT-RIF.EC074-182	Sensitive	Sensitive	Unclassified	Unclassified	Sensitive																						Resistant	Unclassified	Unclassified	Sensitive	Sensitive
lineage2.2.2	EXIT-RIF.EC573B-345	Sensitive	Sensitive	Unclassified	Unclassified	Sensitive																						Resistant	Unclassified	Unclassified	Sensitive	Sensitive
lineage2.2.2	EXIT-RIF.EC594A-356	Sensitive	Sensitive	Unclassified	Unclassified	Sensitive																						Resistant	Unclassified	Unclassified	Sensitive	Sensitive
lineage2.2.2	EXIT-RIF.EC075-183	Sensitive	Sensitive	Unclassified	Unclassified	Sensitive																						Resistant	Unclassified	Unclassified	Sensitive	Sensitive
lineage2.2.2	EXIT-RIF.EC372-434	Sensitive	Sensitive	Unclassified	Unclassified	Sensitive																						Resistant	Unclassified	Unclassified	Sensitive	Sensitive
lineage2.2.2	EXIT-RIF.EC373-435	Sensitive	Sensitive	Unclassified	Unclassified	Sensitive																						Resistant	Unclassified	Unclassified	Sensitive	Sensitive
lineage2.2.2	EXIT-RIF.EC550B-331	Sensitive	Sensitive	Unclassified	Unclassified	Sensitive																						Resistant	Unclassified	Unclassified	Sensitive	Sensitive
lineage2.2.2	EXIT-RIF.EC550-329	Sensitive	Sensitive	Unclassified	Unclassified	Sensitive																						Resistant	Unclassified	Unclassified	Sensitive	Sensitive
lineage2.2.2	EXIT-RIF.EC550A-330	Sensitive	Sensitive	Unclassified	Unclassified	Sensitive																						Resistant	Unclassified	Unclassified	Sensitive	Sensitive
lineage2.2.2	EXIT-RIF.EC541A-323	Sensitive	Sensitive	Unclassified	Unclassified	Sensitive																						Resistant	Unclassified	Unclassified	Sensitive	Sensitive
lineage2.2.2	EXIT-RIF.EC081-189	Sensitive	Sensitive	Unclassified	Unclassified	Sensitive																						Resistant	Unclassified	Unclassified	Sensitive	Sensitive
lineage2.2.2	EXIT-RIF.EC081A-299	Sensitive	Sensitive	Unclassified	Unclassified	Sensitive																						Resistant	Unclassified	Unclassified	Sensitive	Sensitive
lineage2.2.1	EXIT-RIF.EC307A-395	Sensitive	Sensitive	Unclassified		Sensitive	Sensitive																						Unclassified	Unclassified	Sensitive	Sensitive	Sensitive
lineage2.2.1	EXIT-RIF.GA024-59	Sensitive	Sensitive	Unclassified		Sensitive	Sensitive																						Unclassified	Unclassified	Sensitive	Sensitive	Sensitive
lineage2.2.1	EXIT-RIF.GA306-406	Sensitive	Sensitive	Unclassified		Sensitive	Sensitive																						Unclassified	Unclassified	Sensitive	Sensitive	Sensitive
lineage2.2.1	EXIT-RIF.EC083-202	Sensitive	Sensitive	Unclassified		Sensitive	Sensitive																						Unclassified	Unclassified	Sensitive	Sensitive	Sensitive
lineage2.2.1	EXIT-RIF.FS306-436	Sensitive	Sensitive	Unclassified		Sensitive	Sensitive																						Unclassified	Unclassified	Sensitive	Sensitive	Sensitive
lineage2.2.1	EXIT-RIF.FS582-372	Sensitive	Sensitive	Unclassified		Sensitive	Sensitive			Unclassified																			Unclassified	Unclassified	Sensitive	Sensitive	Sensitive
lineage2.2.1	EXIT-RIF.EC024-35	Sensitive	Sensitive	Unclassified		Sensitive	Sensitive			Unclassified																			Unclassified	Unclassified	Sensitive	Sensitive	Sensitive
lineage2.2.1	EXIT-RIF.FS062-237	Sensitive	Sensitive	Unclassified		Sensitive	Sensitive			Unclassified																			Unclassified	Unclassified	Sensitive	Sensitive	Sensitive
lineage2.2.1	EXIT-RIF.EC055-163	Sensitive	Sensitive	Unclassified		Sensitive	Sensitive			Unclassified																			Unclassified	Unclassified	Sensitive	Sensitive	Sensitive
lineage2.2.1	EXIT-RIF.EC548B-327	Sensitive	Sensitive	Unclassified		Sensitive	Sensitive			Unclassified																			Unclassified	Unclassified	Sensitive	Sensitive	Sensitive
lineage2.2.1	EXIT-RIF.FS003-2	Sensitive	Sensitive	Unclassified		Sensitive	Sensitive																						Unclassified	Unclassified	Sensitive	Sensitive	Sensitive
lineage2.2.1	EXIT-RIF.FS025-75	Sensitive	Sensitive	Unclassified		Sensitive	Sensitive																						Unclassified	Unclassified	Sensitive	Sensitive	Sensitive
lineage2.2.1	EXIT-RIF.GA342-416	Sensitive	Sensitive	Unclassified		Sensitive	Sensitive																						Unclassified	Unclassified	Sensitive	Sensitive	Sensitive
lineage2.2.1	EXIT-RIF.GA346-418	Sensitive	Sensitive	Unclassified		Sensitive	Sensitive																						Unclassified	Unclassified	Sensitive	Sensitive	Sensitive
lineage2.2.1	EXIT-RIF.FS508-283	Sensitive	Sensitive	Unclassified		Sensitive	Sensitive																						Unclassified	Unclassified	Sensitive	Sensitive	Sensitive
lineage2.2.1	EXIT-RIF.GA007-44	Sensitive	Sensitive	Unclassified		Sensitive	Sensitive																						Unclassified	Unclassified	Sensitive	Sensitive	Sensitive
lineage2.2.1	EXIT-RIF.GA315-409	Sensitive	Sensitive	Unclassified		Sensitive	Sensitive																						Unclassified	Unclassified	Sensitive	Sensitive	Sensitive
lineage2.2.1	EXIT-RIF.EC304-393	Sensitive	Sensitive	Unclassified		Sensitive	Sensitive																						Unclassified	Unclassified	Sensitive	Sensitive	Sensitive
lineage2.2.1	EXIT-RIF.FS501-244	Sensitive	Sensitive	Unclassified		Sensitive	Sensitive																						Unclassified	Unclassified	Sensitive	Sensitive	Sensitive
lineage2.2.1	EXIT-RIF.GA001-38	Sensitive	Sensitive	Unclassified		Sensitive	Sensitive																						Unclassified	Unclassified	Sensitive	Sensitive	Sensitive
lineage2.2.1.1	EXIT-RIF.EC035-99	Sensitive	Sensitive	Unclassified		Sensitive	Sensitive		Unclassified																				Unclassified	Unclassified	Sensitive	Sensitive	Sensitive	Sensitive
lineage2.2.1.1	EXIT-RIF.EC085-204	Sensitive	Sensitive	Unclassified		Sensitive	Sensitive		Unclassified																				Unclassified	Unclassified	Sensitive	Sensitive	Sensitive	Sensitive
lineage2.2.1.1	EXIT-RIF.EC387-465	Sensitive	Sensitive	Unclassified		Sensitive	Sensitive		Unclassified																				Unclassified	Unclassified	Sensitive	Sensitive	Sensitive	Sensitive
lineage2.2.1.1	EXIT-RIF.EC018-30	Sensitive	Sensitive	Unclassified		Sensitive	Sensitive		Unclassified																				Unclassified	Unclassified	Sensitive	Sensitive	Sensitive	Sensitive
lineage2.2.1.1	EXIT-RIF.EC053-161	Sensitive	Sensitive	Unclassified		Sensitive	Sensitive		Unclassified																				Unclassified	Unclassified	Sensitive	Sensitive	Sensitive	Sensitive
lineage2.2.1.1	EXIT-RIF.EC364-429	Sensitive	Sensitive	Unclassified		Sensitive	Sensitive		Unclassified																				Unclassified	Unclassified	Sensitive	Sensitive	Sensitive	Sensitive
lineage2.2.1.1	EXIT-RIF.FS535-367	Sensitive	Sensitive	Unclassified		Sensitive	Sensitive		Unclassified																				Unclassified	Unclassified	Sensitive	Sensitive	Sensitive	Sensitive
lineage2.2.1.1	EXIT-RIF.EC114-266	Sensitive	Sensitive	Unclassified		Sensitive	Sensitive		Unclassified																				Unclassified	Unclassified	Sensitive	Sensitive	Sensitive	Sensitive
lineage2.2.1.1	EXIT-RIF.EC012A-269	Sensitive	Sensitive	Unclassified		Sensitive	Sensitive		Unclassified																			Resistant	Unclassified	Unclassified	Sensitive	Sensitive	Sensitive	Sensitive
lineage2.2.1.1	EXIT-RIF.EC012B-270	Sensitive	Sensitive	Unclassified		Sensitive	Sensitive		Unclassified																			Resistant	Unclassified	Unclassified	Sensitive	Sensitive	Sensitive	Sensitive
lineage2.2.1.1	EXIT-RIF.FS048-148	Sensitive	Sensitive	Unclassified		Sensitive	Sensitive		Unclassified																				Unclassified	Unclassified	Sensitive	Sensitive	Sensitive	Sensitive
lineage2.2.1.1	EXIT-RIF.EC048-110	Sensitive	Sensitive	Unclassified		Sensitive	Sensitive		Unclassified																				Unclassified	Unclassified	Sensitive	Sensitive	Sensitive	Sensitive
lineage2.2.1.1	EXIT-RIF.EC048A-271	Sensitive	Sensitive	Unclassified		Sensitive	Sensitive		Unclassified																				Unclassified	Unclassified	Sensitive	Sensitive	Sensitive	Sensitive
lineage2.2.1.1	EXIT-RIF.EC567A-341	Sensitive	Sensitive	Unclassified		Sensitive	Sensitive		Unclassified										Unclassified									Resistant	Unclassified	Unclassified	Sensitive	Sensitive	Sensitive	Sensitive
lineage2.2.1.1	EXIT-RIF.EC066-174	Sensitive	Sensitive	Unclassified		Sensitive	Sensitive		Unclassified						Unclassified														Unclassified	Unclassified	Sensitive	Sensitive	Sensitive	Sensitive
lineage2.2.1.1	EXIT-RIF.EC080-188	Sensitive	Sensitive	Unclassified		Sensitive	Sensitive		Unclassified						Unclassified														Unclassified	Unclassified	Sensitive	Sensitive	Sensitive	Sensitive
lineage2.2.1.1	EXIT-RIF.EC095-214	Sensitive	Sensitive	Unclassified		Sensitive	Sensitive		Unclassified						Unclassified														Unclassified	Unclassified	Sensitive	Sensitive	Sensitive	Sensitive
lineage2.2.1.1	EXIT-RIF.GA062-195	Sensitive	Sensitive	Unclassified		Sensitive	Sensitive		Unclassified						Unclassified														Unclassified	Unclassified	Sensitive	Sensitive	Sensitive	Sensitive
lineage2.2.1.1	EXIT-RIF.GA502-230	Sensitive	Sensitive	Unclassified		Sensitive	Sensitive		Unclassified						Unclassified														Unclassified	Unclassified	Sensitive	Sensitive	Sensitive	Sensitive
lineage2.2.1	EXIT-RIF.GA535-279	Sensitive	Sensitive	Unclassified		Sensitive	Sensitive																						Unclassified	Unclassified	Sensitive	Sensitive	Sensitive
lineage2.2.1	EXIT-RIF.GA509-232	Sensitive	Sensitive	Unclassified		Sensitive	Sensitive																						Unclassified	Unclassified	Sensitive	Sensitive	Sensitive
lineage2.2.1	EXIT-RIF.FS038-138	Sensitive	Sensitive	Unclassified		Sensitive	Sensitive																						Unclassified	Unclassified	Sensitive	Sensitive	Sensitive
lineage2.2.1	EXIT-RIF.FS038A-363	Sensitive	Sensitive	Unclassified		Sensitive	Sensitive																						Unclassified	Unclassified	Sensitive	Sensitive	Sensitive
lineage2.2.1	EXIT-RIF.GA040-119	Sensitive	Sensitive	Unclassified		Sensitive	Sensitive																						Unclassified	Unclassified	Sensitive	Sensitive	Sensitive
lineage2.2.1	EXIT-RIF.GA056-191	Sensitive	Sensitive	Unclassified		Sensitive	Sensitive																						Unclassified	Unclassified	Sensitive	Sensitive	Sensitive
lineage2.2.1	EXIT-RIF.GA076-246	Sensitive	Sensitive	Unclassified		Sensitive	Sensitive																						Unclassified	Unclassified	Sensitive	Sensitive	Sensitive
lineage2.2.1	EXIT-RIF.GA321-411	Sensitive	Sensitive	Unclassified		Sensitive	Sensitive																						Unclassified	Unclassified	Sensitive	Sensitive	Sensitive
lineage2.2.1	EXIT-RIF.FS032-82	Sensitive	Sensitive	Unclassified		Sensitive	Sensitive															Unclassified							Unclassified	Unclassified	Sensitive	Sensitive	Sensitive
lineage2.2.1	EXIT-RIF.GA069-225	Sensitive	Sensitive	Unclassified		Sensitive	Sensitive																						Unclassified	Unclassified	Sensitive	Sensitive	Sensitive
lineage2.2.1	EXIT-RIF.FS017-14	Sensitive	Sensitive	Unclassified		Sensitive	Sensitive																						Unclassified	Unclassified	Sensitive	Sensitive	Sensitive
lineage2.2.1	EXIT-RIF.GA027-116	Sensitive	Sensitive	Unclassified		Sensitive	Sensitive																						Unclassified	Unclassified	Sensitive	Sensitive	Sensitive
lineage2.2.1	EXIT-RIF.GA523-248	Sensitive	Sensitive	Unclassified		Sensitive	Sensitive																						Unclassified	Unclassified	Sensitive	Sensitive	Sensitive
lineage2.2.1	EXIT-RIF.GA032-118	Sensitive	Sensitive	Unclassified		Sensitive	Sensitive																						Unclassified	Unclassified	Sensitive	Sensitive	Sensitive
lineage2.2.1	EXIT-RIF.GA037-122	Sensitive	Sensitive	Unclassified		Sensitive	Sensitive																						Unclassified	Unclassified	Sensitive	Sensitive	Sensitive
lineage2.2.1	EXIT-RIF.FS039-139	Sensitive	Sensitive	Unclassified		Sensitive	Sensitive																						Unclassified	Unclassified	Sensitive	Sensitive	Sensitive
lineage2.2.1	EXIT-RIF.FS583-373	Sensitive	Sensitive	Unclassified		Sensitive	Sensitive																						Unclassified	Unclassified	Sensitive	Sensitive	Sensitive
lineage2.2.1	EXIT-RIF.FS583A-374	Sensitive	Sensitive	Unclassified		Sensitive	Sensitive																						Unclassified	Unclassified	Sensitive	Sensitive	Sensitive
lineage2.2.1	EXIT-RIF.GA058-192	Sensitive	Sensitive	Unclassified		Sensitive	Sensitive																						Unclassified	Unclassified	Sensitive	Sensitive	Sensitive
lineage2.2.1	EXIT-RIF.FS310-440	Sensitive	Sensitive	Unclassified		Sensitive	Sensitive																						Unclassified	Unclassified	Sensitive	Sensitive	Sensitive
lineage2.2.1	EXIT-RIF.GA013A-66	Sensitive	Sensitive	Unclassified		Sensitive	Sensitive																						Unclassified	Unclassified	Sensitive	Sensitive	Sensitive
lineage2.2.1	EXIT-RIF.GA043-124	Sensitive	Sensitive	Unclassified		Sensitive	Sensitive																						Unclassified	Unclassified	Sensitive	Sensitive	Sensitive
lineage2.2.1	EXIT-RIF.GA046-127	Sensitive	Sensitive	Unclassified		Sensitive	Sensitive																						Unclassified	Unclassified	Sensitive	Sensitive	Sensitive
lineage2.2.1	EXIT-RIF.GA046A-227	Sensitive	Sensitive	Unclassified		Sensitive	Sensitive																						Unclassified	Unclassified	Sensitive	Sensitive	Sensitive
lineage2.2.1	EXIT-RIF.GA048-129	Sensitive	Sensitive	Unclassified		Sensitive	Sensitive																						Unclassified	Unclassified	Sensitive	Sensitive	Sensitive
lineage2.2.1	EXIT-RIF.FS064-239	Sensitive	Sensitive	Unclassified		Sensitive	Sensitive																						Unclassified	Unclassified	Sensitive	Sensitive	Sensitive
lineage2.2.1	EXIT-RIF.FS021-16	Sensitive	Sensitive	Unclassified		Sensitive	Sensitive																						Unclassified	Unclassified	Sensitive	Sensitive	Sensitive
lineage2.2.1	EXIT-RIF.FS021A-289	Sensitive	Sensitive	Unclassified		Sensitive	Sensitive																						Unclassified	Unclassified	Sensitive	Sensitive	Sensitive
lineage2.2.1	EXIT-RIF.EC071-179	Sensitive	Sensitive	Unclassified		Sensitive	Sensitive																						Unclassified	Unclassified	Sensitive	Sensitive	Sensitive
lineage2.2.1	EXIT-RIF.EC059-167	Sensitive	Sensitive	Unclassified		Sensitive	Sensitive																					Resistant	Unclassified	Unclassified	Sensitive	Sensitive	Sensitive
lineage2.2.1	EXIT-RIF.EC383A-460	Sensitive	Sensitive	Unclassified		Sensitive	Sensitive																					Resistant	Unclassified	Unclassified	Sensitive	Sensitive	Sensitive
lineage2.2.1	EXIT-RIF.EC031-95	Sensitive	Sensitive	Unclassified		Sensitive	Sensitive																						Unclassified	Unclassified	Sensitive	Sensitive	Sensitive
lineage2.2.1	EXIT-RIF.EC041-104	Sensitive	Sensitive	Unclassified		Sensitive	Sensitive																						Unclassified	Unclassified	Sensitive	Sensitive	Sensitive
lineage2.2.1	EXIT-RIF.FS015-12	Sensitive	Sensitive	Unclassified		Sensitive	Sensitive																						Unclassified	Unclassified	Sensitive	Sensitive	Sensitive
lineage2.2.1	EXIT-RIF.FS067-241	Sensitive	Sensitive	Unclassified		Sensitive	Sensitive																						Unclassified	Unclassified	Sensitive	Sensitive	Sensitive
lineage2.2.1	EXIT-RIF.FS311-441	Sensitive	Sensitive	Unclassified		Sensitive	Sensitive																						Unclassified	Unclassified	Sensitive	Sensitive	Sensitive
lineage2.2.1	EXIT-RIF.FS331-448	Sensitive	Sensitive	Unclassified		Sensitive	Sensitive																						Unclassified	Unclassified	Sensitive	Sensitive	Sensitive
lineage2.2.1	EXIT-RIF.FS331B-467	Sensitive	Sensitive	Unclassified		Sensitive	Sensitive																						Unclassified	Unclassified	Sensitive	Sensitive	Sensitive
lineage3	EXIT-RIF.EC561-336	Sensitive	Sensitive			Sensitive																							Unclassified	Unclassified		Sensitive
lineage3.1.1	EXIT-RIF.EC086-205	Sensitive	Sensitive			Sensitive																							Unclassified	Unclassified		Sensitive
lineage3.1.1	EXIT-RIF.EC087-206	Sensitive	Sensitive			Sensitive																							Unclassified	Unclassified		Sensitive
lineage3.1.1	EXIT-RIF.FS042-142	Sensitive	Sensitive			Sensitive																							Unclassified	Unclassified		Sensitive
lineage3.1.1	EXIT-RIF.FS051-150	Sensitive	Sensitive			Sensitive																							Unclassified	Unclassified		Sensitive
lineage3.1.1	EXIT-RIF.FS359-477	Sensitive	Sensitive			Sensitive																							Unclassified	Unclassified		Sensitive
lineage3.1.1	EXIT-RIF.GA527A-251	Sensitive	Sensitive			Sensitive																							Unclassified	Unclassified		Sensitive
lineage3.1.1	EXIT-RIF.GA567A-317	Sensitive	Sensitive			Sensitive																							Unclassified	Unclassified		Sensitive
lineage4.5	EXIT-RIF.FS007-4	Sensitive				Sensitive										Unclassified													Unclassified	Unclassified		Sensitive
lineage4.5	EXIT-RIF.FS007-2	Sensitive				Sensitive										Unclassified													Unclassified	Unclassified		Sensitive
lineage4.5	EXIT-RIF.FS007-2-85	Sensitive				Sensitive										Unclassified													Unclassified	Unclassified		Sensitive
lineage4.7	EXIT-RIF.FS024-74	Sensitive				Sensitive																							Unclassified			Sensitive
lineage4.9	EXIT-RIF.FS037-137	Sensitive				Sensitive																							Unclassified
lineage4.9	EXIT-RIF.FS581-371	Sensitive				Sensitive																							Unclassified
lineage4.9	EXIT-RIF.FS551-365	Sensitive				Sensitive																							Unclassified			Sensitive
lineage4.9	EXIT-RIF.FS537-368																												Unclassified			Sensitive
lineage4.9	EXIT-RIF.GA059-193																												Unclassified			Sensitive
lineage4.9	EXIT-RIF.FS045-145																												Unclassified			Sensitive
lineage4.9	EXIT-RIF.FS060-159																												Unclassified			Sensitive
lineage4.9	EXIT-RIF.FS043-143																												Unclassified			Sensitive
lineage4.9	EXIT-RIF.FS043A-291																												Unclassified			Sensitive
lineage4.8	EXIT-RIF.FS047-147	Sensitive				Sensitive																							Unclassified			Sensitive
lineage4.8	EXIT-RIF.EC113A-275	Sensitive				Sensitive																							Unclassified			Sensitive
lineage4.8	EXIT-RIF.FS503-281	Sensitive				Sensitive																							Unclassified			Sensitive
lineage4.8	EXIT-RIF.EC504-305	Sensitive				Sensitive																							Unclassified			Sensitive
lineage4.8	EXIT-RIF.FS004-3	Sensitive				Sensitive																						Resistant	Unclassified			Sensitive
lineage4.8	EXIT-RIF.FS065-240	Sensitive				Sensitive																							Unclassified			Sensitive
lineage4.8.1	EXIT-RIF.EC312-398	Sensitive				Sensitive																							Unclassified			Sensitive
lineage4.8.1	EXIT-RIF.GA020-56	Sensitive				Sensitive																							Unclassified			Sensitive
lineage4.8	EXIT-RIF.EC311-397	Sensitive				Sensitive																							Unclassified			Sensitive
lineage4.8	EXIT-RIF.EC367-431	Sensitive				Sensitive																							Unclassified			Sensitive
lineage4.8	EXIT-RIF.FS314-442	Sensitive				Sensitive																							Unclassified			Sensitive
lineage4.8	EXIT-RIF.EC503-304	Sensitive				Sensitive																							Unclassified			Sensitive
lineage4.8	EXIT-RIF.EC029-93	Sensitive				Sensitive																							Unclassified			Sensitive
lineage4.8	EXIT-RIF.EC106-258	Sensitive				Sensitive																							Unclassified			Sensitive
lineage4.4.2	EXIT-RIF.GA016-52	Sensitive				Sensitive																							Unclassified	Unclassified		Sensitive
lineage4.4.1.1	EXIT-RIF.EC305-394	Sensitive				Sensitive																							Unclassified	Unclassified		Sensitive
lineage4.4.1.1	EXIT-RIF.EC022-33	Sensitive				Sensitive																							Unclassified	Unclassified		Sensitive
lineage4.4.1.1	EXIT-RIF.GA324-413	Sensitive				Sensitive																							Unclassified	Unclassified		Sensitive
lineage4.4.1.1	EXIT-RIF.GA302-404	Sensitive				Sensitive																							Unclassified	Unclassified		Sensitive
lineage4.4.1.1.1	EXIT-RIF.GA322-412	Sensitive				Sensitive																							Unclassified	Unclassified		Sensitive
lineage4.4.1.1.1	EXIT-RIF.FS500-243	Sensitive				Sensitive																							Unclassified	Unclassified		Sensitive
lineage4.4.1.1.1	EXIT-RIF.GA044-125	Sensitive				Sensitive																							Unclassified	Unclassified		Sensitive
lineage4.4.1.1	EXIT-RIF.FS022-72	Sensitive				Sensitive							Unclassified synonymous																Unclassified	Unclassified		Sensitive
lineage4.4.1.1	EXIT-RIF.GA516-234	Sensitive				Sensitive							Unclassified synonymous																Unclassified	Unclassified		Sensitive
lineage4.4.1.1	EXIT-RIF.FS303-401	Sensitive				Sensitive							Unclassified synonymous																Unclassified	Unclassified		Sensitive
lineage4.4.1.1	EXIT-RIF.GA042-120	Sensitive				Sensitive							Unclassified synonymous																Unclassified	Unclassified		Sensitive
lineage4.4.1.1	EXIT-RIF.GA022-58	Sensitive				Sensitive							Unclassified synonymous																Unclassified	Unclassified		Sensitive
lineage4.4.1.1	EXIT-RIF.GA065-224	Sensitive				Sensitive							Unclassified synonymous																Unclassified	Unclassified
lineage4.4.1.1	EXIT-RIF.FS008-5	Sensitive				Sensitive							Unclassified synonymous																Unclassified	Unclassified		Sensitive
lineage4.4.1.1	EXIT-RIF.FS507-282	Sensitive				Sensitive							Unclassified synonymous																Unclassified	Unclassified		Sensitive
lineage4.4.1.1	EXIT-RIF.FS052-151	Sensitive				Sensitive							Unclassified synonymous															Resistant	Unclassified	Unclassified		Sensitive
lineage4.4.1.1	EXIT-RIF.GA536-314	Sensitive				Sensitive							Unclassified synonymous																Unclassified	Unclassified		Sensitive
lineage4.4.1.1	EXIT-RIF.FS016-13	Sensitive				Sensitive							Unclassified synonymous																Unclassified	Unclassified		Sensitive
lineage4.4.1.1	EXIT-RIF.FS358-476	Sensitive				Sensitive							Unclassified synonymous																Unclassified	Unclassified		Sensitive
lineage4.4.1.1	EXIT-RIF.FS023-73	Sensitive				Sensitive							Unclassified synonymous																Unclassified	Unclassified		Sensitive
lineage4.4.1.1	EXIT-RIF.FS028-78	Sensitive				Sensitive							Unclassified synonymous																Unclassified	Unclassified		Sensitive
lineage4.3.4.1	EXIT-RIF.EC090-209	Sensitive				Sensitive																							Unclassified	Unclassified		Sensitive
lineage4.3.4.2	EXIT-RIF.FS352-472	Sensitive				Sensitive																							Unclassified	Unclassified		Sensitive
lineage4.3.4.2.1	EXIT-RIF.FS512-284	Sensitive				Sensitive																		Unclassified synonymous					Unclassified	Unclassified		Sensitive
lineage4.3.4.2.1	EXIT-RIF.GA057-133	Sensitive				Sensitive																							Unclassified	Unclassified		Sensitive
lineage4.3.4.2.1	EXIT-RIF.GA316-410	Sensitive				Sensitive																							Unclassified	Unclassified		Sensitive					Unclassified	Unclassified	Unclassified	Unclassified	Unclassified	Unclassified	Unclassified	Unclassified	Unclassified	Unclassified	Unclassified	Unclassified	Unclassified
lineage4.3.3	EXIT-RIF.GA514-247	Sensitive				Sensitive								Unclassified															Unclassified	Unclassified		Sensitive
lineage4.3.3	EXIT-RIF.GA029A-200	Sensitive				Sensitive								Unclassified															Unclassified	Unclassified		Sensitive
lineage4.3.3	EXIT-RIF.GA063-223	Sensitive				Sensitive								Unclassified															Unclassified	Unclassified		Sensitive
lineage4.3.3	EXIT-RIF.GA359-450	Sensitive				Sensitive								Unclassified															Unclassified	Unclassified		Sensitive
lineage4.3.3	EXIT-RIF.EC317-399	Sensitive				Sensitive								Unclassified															Unclassified	Unclassified		Sensitive
lineage4.3.3	EXIT-RIF.GA018-54	Sensitive				Sensitive								Unclassified															Unclassified	Unclassified		Sensitive
lineage4.3.3	EXIT-RIF.EC054-162	Sensitive				Sensitive		Unclassified																					Unclassified	Unclassified		Sensitive
lineage4.3.3	EXIT-RIF.EC559-335	Sensitive				Sensitive		Unclassified																					Unclassified	Unclassified		Sensitive
lineage4.3.3	EXIT-RIF.FS019-71	Sensitive				Sensitive		Unclassified																					Unclassified	Unclassified		Sensitive
lineage4.3.3	EXIT-RIF.FS308-438	Sensitive				Sensitive		Unclassified																					Unclassified	Unclassified		Sensitive
lineage4.3.3	EXIT-RIF.FS564-369	Sensitive				Sensitive		Unclassified																					Unclassified	Unclassified		Sensitive
lineage4.3.2	EXIT-RIF.EC088-207	Sensitive				Sensitive																							Unclassified	Unclassified		Sensitive			Sensitive
lineage4.3.2	EXIT-RIF.GA531-277	Sensitive				Sensitive																							Unclassified	Unclassified		Sensitive			Sensitive
lineage4.3.2	EXIT-RIF.EC379B-456	Sensitive				Sensitive																							Unclassified	Unclassified		Sensitive			Sensitive
lineage4.3.2	EXIT-RIF.FS049A-290	Sensitive				Sensitive																							Unclassified	Unclassified		Sensitive			Sensitive
lineage4.3.2.1	EXIT-RIF.EC076-184	Sensitive				Sensitive																							Unclassified	Unclassified		Sensitive			Sensitive
lineage4.3.2.1	EXIT-RIF.GA060-222	Sensitive				Sensitive																							Unclassified	Unclassified		Sensitive			Sensitive
lineage4.3.2.1	EXIT-RIF.FS020-15	Sensitive				Sensitive																							Unclassified	Unclassified		Sensitive			Sensitive
lineage4.3.2.1	EXIT-RIF.FS029-79	Sensitive				Sensitive																							Unclassified	Unclassified		Sensitive			Sensitive
lineage4.3.2.1	EXIT-RIF.FS046-146	Sensitive				Sensitive																							Unclassified	Unclassified		Sensitive			Sensitive
lineage4.3.2.1	EXIT-RIF.FS336-468	Sensitive				Sensitive																							Unclassified	Unclassified		Sensitive			Sensitive
lineage4.3.2.1	EXIT-RIF.EC061-169	Sensitive				Sensitive																							Unclassified	Unclassified		Sensitive			Sensitive
lineage4.3.2.1	EXIT-RIF.EC365-430	Sensitive				Sensitive																							Unclassified	Unclassified		Sensitive			Sensitive
lineage4.3.2.1	EXIT-RIF.FS598-383	Sensitive				Sensitive																							Unclassified	Unclassified		Sensitive			Sensitive	Unclassified synonymous
lineage4.3.2.1	EXIT-RIF.FS598A-384	Sensitive				Sensitive																							Unclassified	Unclassified		Sensitive			Sensitive	Unclassified synonymous
lineage4.3.2.1	EXIT-RIF.FS036-136	Sensitive				Sensitive																							Unclassified	Unclassified		Sensitive			Sensitive
lineage4.3.2.1	EXIT-RIF.FS036A-362	Sensitive				Sensitive																							Unclassified	Unclassified		Sensitive			Sensitive
lineage4.3.2.1	EXIT-RIF.EC111-263	Sensitive				Sensitive																							Unclassified	Unclassified		Sensitive			Sensitive
lineage4.3.2.1	EXIT-RIF.EC068-176	Sensitive				Sensitive														Unclassified									Unclassified	Unclassified		Sensitive			Sensitive
lineage4.3.2.1	EXIT-RIF.EC382-458	Sensitive				Sensitive														Unclassified									Unclassified	Unclassified		Sensitive			Sensitive
lineage4.3.2.1	EXIT-RIF.EC382A-459	Sensitive				Sensitive														Unclassified									Unclassified	Unclassified		Sensitive			Sensitive
lineage4.3.2.1	EXIT-RIF.FS061-236	Sensitive				Sensitive																							Unclassified	Unclassified		Sensitive			Sensitive
lineage4.3.2.1	EXIT-RIF.FS055-154	Sensitive				Sensitive																							Unclassified	Unclassified		Sensitive			Sensitive
lineage4.3.2.1	EXIT-RIF.FS050-149	Sensitive				Sensitive																							Unclassified	Unclassified		Sensitive			Sensitive
lineage4.3.2.1	EXIT-RIF.FS053-152	Sensitive				Sensitive																							Unclassified	Unclassified		Sensitive			Sensitive
lineage4.3.2.1	EXIT-RIF.FS054-153	Sensitive				Sensitive																							Unclassified	Unclassified		Sensitive			Sensitive
lineage4.3.2.1	EXIT-RIF.EC092-211	Sensitive				Sensitive																							Unclassified	Unclassified		Sensitive			Sensitive
lineage4.3.2.1	EXIT-RIF.EC589-351	Sensitive				Sensitive																							Unclassified	Unclassified		Sensitive			Sensitive
lineage4.3.2.1	EXIT-RIF.EC536B-322	Sensitive				Sensitive																							Unclassified	Unclassified		Sensitive			Sensitive
lineage4.3.2.1	EXIT-RIF.GA080-313	Sensitive				Sensitive																							Unclassified	Unclassified		Sensitive			Sensitive
lineage4.3.2.1	EXIT-RIF.GA576B-366	Sensitive				Sensitive																							Unclassified	Unclassified		Sensitive			Sensitive
lineage4.3.2.1	EXIT-RIF.GA004-41	Sensitive				Sensitive																							Unclassified	Unclassified		Sensitive			Sensitive
lineage4.3.2.1	EXIT-RIF.EC514-307	Sensitive				Sensitive																							Unclassified	Unclassified		Sensitive			Sensitive
lineage4.3.2.1	EXIT-RIF.EC577-389	Sensitive				Sensitive																							Unclassified	Unclassified		Sensitive			Sensitive
lineage4.3.2.1	EXIT-RIF.GA068-199	Sensitive				Sensitive																							Unclassified	Unclassified		Sensitive			Sensitive
lineage4.3.2.1	EXIT-RIF.FS027-77	Sensitive				Sensitive																							Unclassified	Unclassified		Sensitive			Sensitive
lineage4.3.2.1	EXIT-RIF.GA003-40	Sensitive				Sensitive																							Unclassified	Unclassified		Sensitive			Sensitive
lineage4.3.2.1	EXIT-RIF.GA369-452	Sensitive				Sensitive																							Unclassified	Unclassified		Sensitive			Sensitive
lineage4.3.2.1	EXIT-RIF.GA500-229	Sensitive				Sensitive																							Unclassified	Unclassified		Sensitive			Sensitive
lineage4.3.2.1	EXIT-RIF.FS353-474	Sensitive				Sensitive																							Unclassified	Unclassified		Sensitive			Sensitive
lineage4.3.2.1	EXIT-RIF.FS596-382	Sensitive				Sensitive																							Unclassified	Unclassified		Sensitive			Sensitive
lineage4.3.2.1	EXIT-RIF.FS026-76	Sensitive				Sensitive																							Unclassified	Unclassified		Sensitive			Sensitive
lineage4.3.2.1	EXIT-RIF.FS321-445	Sensitive				Sensitive																							Unclassified	Unclassified		Sensitive			Sensitive
lineage4.1.2	EXIT-RIF.GA569-315	Sensitive				Sensitive																							Unclassified	Unclassified		Sensitive
lineage4.1.2	EXIT-RIF.FS041-141	Sensitive				Sensitive																			Unclassified synonymous				Unclassified	Unclassified		Sensitive
lineage4.1.2.1	EXIT-RIF.FS009-6	Sensitive				Sensitive																							Unclassified	Unclassified		Sensitive
lineage4.1.2.1	EXIT-RIF.GA047-128	Sensitive				Sensitive																							Unclassified	Unclassified		Sensitive
lineage4.1.2.1	EXIT-RIF.GA030-61	Sensitive				Sensitive																							Unclassified	Unclassified		Sensitive
lineage4.1.2.1	EXIT-RIF.GA035-63	Sensitive				Sensitive																							Unclassified	Unclassified		Sensitive
lineage4.1.2.1	EXIT-RIF.FS579-370	Sensitive				Sensitive																							Unclassified	Unclassified		Sensitive
lineage4.1.2.1	EXIT-RIF.FS348-470	Sensitive				Sensitive																							Unclassified	Unclassified		Sensitive
lineage4.1.2.1	EXIT-RIF.FS356-475	Sensitive				Sensitive																							Unclassified	Unclassified		Sensitive
lineage4.1.2.1	EXIT-RIF.EC067-175	Sensitive				Sensitive																							Unclassified	Unclassified		Sensitive
lineage4.1.2.1	EXIT-RIF.EC051-113	Sensitive				Sensitive																							Unclassified	Unclassified		Sensitive
lineage4.1.2.1	EXIT-RIF.EC051B-221	Sensitive				Sensitive																							Unclassified	Unclassified		Sensitive
lineage4.1.1	EXIT-RIF.EC531B-386	Sensitive				Sensitive																							Unclassified	Unclassified		Sensitive
lineage4.1.1.2	EXIT-RIF.FS068C-242	Sensitive				Sensitive																							Unclassified	Unclassified		Sensitive
lineage4.1.1.2	EXIT-RIF.FS031-2-89	Sensitive				Sensitive																							Unclassified	Unclassified		Sensitive
lineage4.1.1.2	EXIT-RIF.FS031-2	Sensitive				Sensitive																							Unclassified	Unclassified		Sensitive
lineage4.1.1.2	EXIT-RIF.FS031-81	Sensitive				Sensitive																							Unclassified	Unclassified		Sensitive
lineage4.1.1	EXIT-RIF.GA006A-65	Sensitive				Sensitive																							Unclassified	Unclassified		Sensitive
lineage4.1.1	EXIT-RIF.FS592-380	Sensitive				Sensitive																							Unclassified	Unclassified		Sensitive
lineage4.1.1	EXIT-RIF.FS002-67	Sensitive				Sensitive																							Unclassified	Unclassified		Sensitive
lineage4.1.1	EXIT-RIF.GA064-196	Sensitive				Sensitive																							Unclassified	Unclassified		Sensitive
lineage4.1.1	EXIT-RIF.GA064A-228	Sensitive				Sensitive																							Unclassified	Unclassified		Sensitive
lineage4.1.1.3	EXIT-RIF.FS588-377	Sensitive				Sensitive												Unclassified											Unclassified	Unclassified		Sensitive
lineage4.1.1.3	EXIT-RIF.FS588A-378	Sensitive				Sensitive												Unclassified											Unclassified	Unclassified		Sensitive
lineage4.1.1.3	EXIT-RIF.EC082-190	Sensitive				Sensitive																							Unclassified	Unclassified
lineage4.1.1.3	EXIT-RIF.FS010-2-160	Sensitive				Sensitive																							Unclassified	Unclassified		Sensitive
lineage4.1.1.3	EXIT-RIF.FS010-7	Sensitive				Sensitive																							Unclassified	Unclassified		Sensitive
lineage4.1.1.3	EXIT-RIF.FS322-446	Sensitive				Sensitive											Unclassified												Unclassified	Unclassified		Sensitive
lineage4.1.1.3	EXIT-RIF.FS527-288	Sensitive				Sensitive																							Unclassified	Unclassified		Sensitive
lineage4.1.1.3	EXIT-RIF.GA540-294	Sensitive				Sensitive																							Unclassified	Unclassified		Sensitive
lineage4.1.1.3	EXIT-RIF.GA540A-295	Sensitive				Sensitive																							Unclassified	Unclassified		Sensitive
lineage4.1.1.3	EXIT-RIF.EC525-311	Sensitive				Sensitive																							Unclassified	Unclassified		Sensitive
lineage4.1.1.3	EXIT-RIF.EC525A-312	Sensitive				Sensitive																							Unclassified	Unclassified		Sensitive
lineage4.1.1.3	EXIT-RIF.EC073-181	Sensitive				Sensitive																							Unclassified	Unclassified		Sensitive
lineage4.1.1.3	EXIT-RIF.EC045-107	Sensitive				Sensitive																							Unclassified	Unclassified		Sensitive
lineage4.1.1.3	EXIT-RIF.EC342-423	Sensitive				Sensitive																							Unclassified	Unclassified		Sensitive
lineage4.1.1.3	EXIT-RIF.EC065-173	Sensitive				Sensitive																							Unclassified	Unclassified		Sensitive
lineage4.1.1.3	EXIT-RIF.FS034-84	Sensitive				Sensitive																	Unclassified						Unclassified	Unclassified		Sensitive
lineage4.1.1.3	EXIT-RIF.FS035-135	Sensitive				Sensitive																							Unclassified	Unclassified		Sensitive
lineage4.1.1.3	EXIT-RIF.FS044-144	Sensitive				Sensitive																							Unclassified	Unclassified		Sensitive
lineage4.1.1.3	EXIT-RIF.FS059-158	Sensitive				Sensitive																							Unclassified	Unclassified		Sensitive
lineage4.1.1.3	EXIT-RIF.FS355-473	Sensitive				Sensitive																				Unclassified			Unclassified	Unclassified		Sensitive
lineage4.1.1.3	EXIT-RIF.GA078-276	Sensitive				Sensitive																							Unclassified	Unclassified		Sensitive
lineage4.1.1.3	EXIT-RIF.EC104-256	Sensitive				Sensitive																							Unclassified	Unclassified		Sensitive
lineage4.1.1.3	EXIT-RIF.GA504-231	Sensitive				Sensitive																							Unclassified	Unclassified		Sensitive
lineage4.1.1.3	EXIT-RIF.EC565-387	Sensitive				Sensitive																							Unclassified	Unclassified		Sensitive
lineage4.1.1.3	EXIT-RIF.EC565A-339	Sensitive				Sensitive																							Unclassified	Unclassified
lineage4.1.1.3	EXIT-RIF.FS513-285	Sensitive				Sensitive																							Unclassified	Unclassified		Sensitive
lineage4.1.1.3	EXIT-RIF.FS584-375	Sensitive				Sensitive																							Unclassified	Unclassified
lineage4.1.1.3	EXIT-RIF.FS591-379	Sensitive				Sensitive																							Unclassified	Unclassified		Sensitive
lineage4.1.1.3	EXIT-RIF.GA008-45	Sensitive				Sensitive																							Unclassified	Unclassified		Sensitive
lineage4.1.1.3	EXIT-RIF.FS006-69	Sensitive				Sensitive																							Unclassified	Unclassified		Sensitive
lineage4.1.1.3	EXIT-RIF.FS056-155	Sensitive				Sensitive																							Unclassified	Unclassified		Sensitive
[truncated: 643 more columns]
