# Supplementary material for: TBProfiler for automated calling of the association with drug resistance of variants in Mycobacterium tuberculosis
Source: PLoS One. 2022 Dec 30;17(12):e0279644. doi: 10.1371/journal.pone.0279644 (PMC9803136; doi:10.1371/journal.pone.0279644)
Supplement: S2 File — (CSV) [file pone.0279644.s003.csv]

	variant	drug	classification	genome_position	who_original	gene	hgvs	fail
0	rrs_a1401g	AMI	1	1473246	rrs_a1401g	rrs	n.1401A>G	False
1	eis_c-14t	AMI	1	2715346	eis_c-14t	eis	c.-14C>T	False
2	rrs_g1484t	AMI	2	1473329	rrs_g1484t	rrs	n.1484G>T	False
3	rrs_c1402t	AMI	2	1473247	rrs_c1402t	rrs	n.1402C>T	False
4	whiB6_A77V	AMI	3	nan	whiB6_A77V	whiB6	p.Ala77Val	False
5	aftB_c-92t	AMI	3	4268928	aftB_c-92t (ubiA_302)	aftB	c.-92C>T	False
6	whiB6_C53R	AMI	3	nan	whiB6_C53R	whiB6	p.Cys53Arg	False
7	eis_g-37t	AMI	3	2715369	eis_g-37t	eis	c.-37G>T	False
8	eis_g-10a	AMI	3	2715342	eis_g-10a	eis	c.-10G>A	False
9	whiB7_246_ins_2_c_caa	AMI	3	3568434	whiB7_246_ins_2_c_caa	whiB7	c.245_246insTT	False
10	whiB7_H79Q	AMI	3	nan	whiB7_H79Q	whiB7	p.His79Gln	False
11	whiB7_K80Q	AMI	3	nan	whiB7_K80Q	whiB7	p.Lys80Gln	False
12	whiB7_R81H	AMI	3	nan	whiB7_R81H	whiB7	p.Arg81His	False
13	aftB_A304S	AMI	3	nan	aftB_A304S	aftB	p.Ala304Ser	False
14	aftB_A389V	AMI	3	nan	aftB_A389V	aftB	p.Ala389Val	False
15	whiB6_288_ins_1_t_tc	AMI	3	4338234	whiB6_288_ins_1_t_tc	whiB6	c.287_288insG	False
16	whiB6_g-34a	AMI	3	4338555	whiB6_g-34a	whiB6	c.-34G>A	False
17	aftB_V320M	AMI	3	nan	aftB_V320M	aftB	p.Val320Met	False
18	whiB6_L92S	AMI	3	nan	whiB6_L92S	whiB6	p.Leu92Ser	False
19	ccsA_P61L	AMI	3	nan	ccsA_P61L	ccsA	p.Pro61Leu	False
20	fprA_P440A	AMI	3	nan	fprA_P440A	fprA	p.Pro440Ala	False
21	fprA_R291H	AMI	3	nan	fprA_R291H	fprA	p.Arg291His	False
22	whiB6_321_ins_1_gcgc_gccgc	AMI	3	4338201	whiB6_321_ins_1_gcgc_gccgc	whiB6	c.320_321insG|c.319_320insG	False
23	fprA_V251A	AMI	3	nan	fprA_V251A	fprA	p.Val251Ala	False
24	whiB7_a-161g	AMI	3	3568840	whiB7_a-161g	whiB7	c.-161A>G	False
25	rrs_a-141g	AMI	3	1471705	rrs_a-141g	rrs	n.-141A>G	False
26	whiB6_L75Q	AMI	3	nan	whiB6_L75Q	whiB6	p.Leu75Gln	False
27	fprA_564_del_2_acg_a	AMI	3	3474570	fprA_564_del_2_acg_a	fprA	c.565_566del	False
28	fprA_N349T	AMI	3	nan	fprA_N349T	fprA	p.Asn349Thr	False
29	whiB6_-73_del_1_agctctagtg_agtctagta	AMI	3	4338594	whiB6_-73_del_1_agctctagtg_agtctagta			True
30	whiB6_c-185t	AMI	3	4338706	whiB6_c-185t	whiB6	c.-185C>T	False
31	whiB6_-66_del_1_agctccgagctctagt_agctccgagtctcgt	AMI	3	4338587	whiB6_-66_del_1_agctccgagctctagt_agctccgagtctcgt			True
32	whiB6_R17G	AMI	3	nan	whiB6_R17G	whiB6	p.Arg17Gly	False
33	whiB6_-66_del_1_agctccgagctctagt_agctccgagtcgagt	AMI	3	4338587	whiB6_-66_del_1_agctccgagctctagt_agctccgagtcgagt			True
34	aftB_Q322E	AMI	3	nan	aftB_Q322E	aftB	p.Gln322Glu	False
35	aftB_K522R	AMI	3	nan	aftB_K522R	aftB	p.Lys522Arg	False
36	whiB6_g-42t	AMI	3	4338563	whiB6_g-42t	whiB6	c.-42G>T	False
37	eis_W36R	AMI	3	nan	eis_W36R	eis	p.Trp36Arg	False
38	whiB7_L42P	AMI	3	nan	whiB7_L42P	whiB7	p.Leu42Pro	False
39	rrs_a906g	AMI	3	1472751	rrs_a906g	rrs	n.906A>G	False
40	whiB7_a-80c	AMI	3	3568759	whiB7_a-80c	whiB7	c.-80A>C	False
41	whiB7_193_ins_1_c_cg	AMI	3	3568487	whiB7_193_ins_1_c_cg	whiB7	c.192_193insC	False
42	whiB7_262_del_12_tgcgcggacgtcc_t	AMI	3	3568418	whiB7_262_del_12_tgcgcggacgtcc_t	whiB7	c.250_261del	False
43	eis_g-10c	AMI	3	2715342	eis_g-10c	eis	c.-10G>C	False
44	eis_L235R	AMI	3	nan	eis_L235R	eis	p.Leu235Arg	False
45	eis_a-61g	AMI	3	2715393	eis_a-61g	eis	c.-61A>G	False
46	eis_E199A	AMI	3	nan	eis_E199A	eis	p.Glu199Ala	False
47	eis_G60E	AMI	3	nan	eis_G60E	eis	p.Gly60Glu	False
48	eis_L331R	AMI	3	nan	eis_L331R	eis	p.Leu331Arg	False
49	eis_P78A	AMI	3	nan	eis_P78A	eis	p.Pro78Ala	False
50	eis_V301G	AMI	3	nan	eis_V301G	eis	p.Val301Gly	False
51	rrs_a907c	AMI	3	1472752	rrs_a907c	rrs	n.907A>C	False
52	rrs_c1320t	AMI	3	1473165	rrs_c1320t	rrs	n.1320C>T	False
53	rrs_c1489t	AMI	3	1473334	rrs_c1489t	rrs	n.1489C>T	False
54	rrs_c81t	AMI	3	1471926	rrs_c81t	rrs	n.81C>T	False
55	rrs_t166g	AMI	3	1472011	rrs_t166g	rrs	n.166T>G	False
56	rrs_t460c	AMI	3	1472305	rrs_t460c	rrs	n.460T>C	False
57	whiB7_-54_del_1_ac_a	AMI	3	3568733	whiB7_-54_del_1_ac_a	whiB7	c.-55del	False
58	eis_V85A	AMI	3	nan	eis_V85A	eis	p.Val85Ala	False
59	rrs_g1415t	AMI	3	1473260	rrs_g1415t	rrs	n.1415G>T	False
60	rrs_g1484a	AMI	3	1473329	rrs_g1484a	rrs	n.1484G>A	False
61	rrs_t1491a	AMI	3	1473336	rrs_t1491a	rrs	n.1491T>A	False
62	eis_A22G	AMI	3	nan	eis_A22G	eis	p.Ala22Gly	False
63	eis_c-8t	AMI	3	2715340	eis_c-8t	eis	c.-8C>T	False
64	rrs_1536_ins_3_ctaaggagcaccacgaaaacgccccaactggtggggcgtaggccgtgagg_cgaaggagcaccacgaaaagcaccccaactggtggggtgcgagccgtgag	AMI	3	1473381	rrs_1536_ins_3_ctaaggagcaccacgaaaacgccccaactggtggggcgtaggccgtgagg_cgaaggagcaccacgaaaagcaccccaactggtggggtgcgagccgtgag			True
65	rrs_g1016t	AMI	3	1472861	rrs_g1016t	rrs	n.1016G>T	False
66	rrs_g1523a	AMI	3	1473368	rrs_g1523a	rrs	n.1523G>A	False
67	rrs_1258_ins_1_gcgaggttaagcgaatccttaaaagccggtctcagttcggatcggggtct_gtaaggttaagcgaatccttttaaagccggtctcagttcggattggggtc	AMI	3	1473103	rrs_1258_ins_1_gcgaggttaagcgaatccttaaaagccggtctcagttcggatcggggtct_gtaaggttaagcgaatccttttaaagccggtctcagttcggattggggtc			True
68	rrs_1444_ins_2_tc_tttt	AMI	3	1473289	rrs_1444_ins_2_tc_tttt			True
69	rrs_182_del_2_cacgggatgcatgtcttgtggtggaaagcgctttagcggtgtgggatga_ctcaagacgcatgtcttctggtggaaagcttttgcggtgtgggatgg	AMI	3	1472027	rrs_182_del_2_cacgggatgcatgtcttgtggtggaaagcgctttagcggtgtgggatga_ctcaagacgcatgtcttctggtggaaagcttttgcggtgtgggatgg			True
70	rrs_c1125g	AMI	3	1472970	rrs_c1125g	rrs	n.1125C>G	False
71	rrs_g1132c	AMI	3	1472977	rrs_g1132c	rrs	n.1132G>C	False
72	rrs_g125a	AMI	3	1471970	rrs_g125a	rrs	n.125G>A	False
73	rrs_t124c	AMI	3	1471969	rrs_t124c	rrs	n.124T>C	False
74	rrs_t16c	AMI	3	1471861	rrs_t16c	rrs	n.16T>C	False
75	eis_807_del_2_ggtga_gga	AMI	3	2714526	eis_807_del_2_ggtga_gga	eis	c.805_806del|c.804_805del	False
76	rrs_a1124g	AMI	3	1472969	rrs_a1124g	rrs	n.1124A>G	False
77	rrs_c462t	AMI	3	1472307	rrs_c462t	rrs	n.462C>T	False
78	rrs_t1133c	AMI	3	1472978	rrs_t1133c	rrs	n.1133T>C	False
79	rrs_t78c	AMI	3	1471923	rrs_t78c	rrs	n.78T>C	False
80	rrs_a89g	AMI	3	1471934	rrs_a89g	rrs	n.89A>G	False
81	eis_g-6t	AMI	3	2715338	eis_g-6t	eis	c.-6G>T	False
82	eis_-7_del_1_cg_c	AMI	3	2715339	eis_-7_del_1_cg_c	eis	c.-8del	False
83	whiB7_t-57g	AMI	3	3568736	whiB7_t-57g	whiB7	c.-57T>G	False
84	rrs_t17g	AMI	3	1471862	rrs_t17g	rrs	n.17T>G	False
85	rrs_c1443g	AMI	3	1473288	rrs_c1443g	rrs	n.1443C>G	False
86	eis_R106H	AMI	3	nan	eis_R106H	eis	p.Arg106His	False
87	aftB_A196E	AMI	3	nan	aftB_A196E	aftB	p.Ala196Glu	False
88	aftB_A203V	AMI	3	nan	aftB_A203V	aftB	p.Ala203Val	False
89	aftB_A304E	AMI	3	nan	aftB_A304E	aftB	p.Ala304Glu	False
90	aftB_A341P	AMI	3	nan	aftB_A341P	aftB	p.Ala341Pro	False
91	aftB_A348D	AMI	3	nan	aftB_A348D	aftB	p.Ala348Asp	False
92	aftB_A417S	AMI	3	nan	aftB_A417S	aftB	p.Ala417Ser	False
93	aftB_A516V	AMI	3	nan	aftB_A516V	aftB	p.Ala516Val	False
94	aftB_A539V	AMI	3	nan	aftB_A539V	aftB	p.Ala539Val	False
95	aftB_A564T	AMI	3	nan	aftB_A564T	aftB	p.Ala564Thr	False
96	aftB_A565D	AMI	3	nan	aftB_A565D	aftB	p.Ala565Asp	False
97	aftB_A580S	AMI	3	nan	aftB_A580S	aftB	p.Ala580Ser	False
98	aftB_A85P	AMI	3	nan	aftB_A85P	aftB	p.Ala85Pro	False
99	aftB_c-12t	AMI	3	4268848	aftB_c-12t	aftB	c.-12C>T	False
100	aftB_c-1g	AMI	3	4268837	aftB_c-1g	aftB	c.-1C>G	False
101	aftB_c-1t	AMI	3	4268837	aftB_c-1t	aftB	c.-1C>T	False
102	aftB_C345W	AMI	3	nan	aftB_C345W	aftB	p.Cys345Trp	False
103	aftB_c-37t	AMI	3	4268873	aftB_c-37t	aftB	c.-37C>T	False
104	aftB_c-3a	AMI	3	4268839	aftB_c-3a	aftB	c.-3C>A	False
105	aftB_c-3t	AMI	3	4268839	aftB_c-3t	aftB	c.-3C>T	False
106	aftB_c-45t	AMI	3	4268881	aftB_c-45t	aftB	c.-45C>T	False
107	aftB_c-54t	AMI	3	4268890	aftB_c-54t	aftB	c.-54C>T	False
108	aftB_D431Y	AMI	3	nan	aftB_D431Y	aftB	p.Asp431Tyr	False
109	aftB_D461G	AMI	3	nan	aftB_D461G	aftB	p.Asp461Gly	False
110	aftB_D555E	AMI	3	nan	aftB_D555E	aftB	p.Asp555Glu	False
111	aftB_D619Y	AMI	3	nan	aftB_D619Y	aftB	p.Asp619Tyr	False
112	aftB_E366K	AMI	3	nan	aftB_E366K	aftB	p.Glu366Lys	False
113	aftB_E53D	AMI	3	nan	aftB_E53D	aftB	p.Glu53Asp	False
114	aftB_E596G	AMI	3	nan	aftB_E596G	aftB	p.Glu596Gly	False
115	aftB_E596K	AMI	3	nan	aftB_E596K	aftB	p.Glu596Lys	False
116	aftB_E627D	AMI	3	nan	aftB_E627D	aftB	p.Glu627Asp	False
117	aftB_F597L	AMI	3	nan	aftB_F597L	aftB	p.Phe597Leu	False
118	aftB_G103A	AMI	3	nan	aftB_G103A	aftB	p.Gly103Ala	False
119	aftB_g-128t	AMI	3	4268964	aftB_g-128t (ubiA_290)	aftB	c.-128G>T	False
120	aftB_G180A	AMI	3	nan	aftB_G180A	aftB	p.Gly180Ala	False
121	aftB_G194A	AMI	3	nan	aftB_G194A	aftB	p.Gly194Ala	False
122	aftB_G218A	AMI	3	nan	aftB_G218A	aftB	p.Gly218Ala	False
123	aftB_G299S	AMI	3	nan	aftB_G299S	aftB	p.Gly299Ser	False
124	aftB_g-32a	AMI	3	4268868	aftB_g-32a	aftB	c.-32G>A	False
125	aftB_G331S	AMI	3	nan	aftB_G331S	aftB	p.Gly331Ser	False
126	aftB_G351W	AMI	3	nan	aftB_G351W	aftB	p.Gly351Trp	False
127	aftB_G377A	AMI	3	nan	aftB_G377A	aftB	p.Gly377Ala	False
128	aftB_G394D	AMI	3	nan	aftB_G394D	aftB	p.Gly394Asp	False
129	aftB_G396V	AMI	3	nan	aftB_G396V	aftB	p.Gly396Val	False
130	aftB_g-40a	AMI	3	4268876	aftB_g-40a	aftB	c.-40G>A	False
131	aftB_g-40c	AMI	3	4268876	aftB_g-40c	aftB	c.-40G>C	False
132	aftB_g-46a	AMI	3	4268882	aftB_g-46a	aftB	c.-46G>A	False
133	aftB_G549S	AMI	3	nan	aftB_G549S	aftB	p.Gly549Ser	False
134	aftB_g-58t	AMI	3	4268894	aftB_g-58t	aftB	c.-58G>T	False
135	aftB_G620R	AMI	3	nan	aftB_G620R	aftB	p.Gly620Arg	False
136	aftB_G622V	AMI	3	nan	aftB_G622V	aftB	p.Gly622Val	False
137	aftB_G74A	AMI	3	nan	aftB_G74A	aftB	p.Gly74Ala	False
138	aftB_G75R	AMI	3	nan	aftB_G75R	aftB	p.Gly75Arg	False
139	aftB_H593Y	AMI	3	nan	aftB_H593Y	aftB	p.His593Tyr	False
140	aftB_I116T	AMI	3	nan	aftB_I116T	aftB	p.Ile116Thr	False
141	aftB_I202V	AMI	3	nan	aftB_I202V	aftB	p.Ile202Val	False
142	aftB_I33T	AMI	3	nan	aftB_I33T	aftB	p.Ile33Thr	False
143	aftB_I355V	AMI	3	nan	aftB_I355V	aftB	p.Ile355Val	False
144	aftB_I466V	AMI	3	nan	aftB_I466V	aftB	p.Ile466Val	False
145	aftB_I582T	AMI	3	nan	aftB_I582T	aftB	p.Ile582Thr	False
146	aftB_L100P	AMI	3	nan	aftB_L100P	aftB	p.Leu100Pro	False
147	aftB_L105S	AMI	3	nan	aftB_L105S	aftB	p.Leu105Ser	False
148	aftB_L162V	AMI	3	nan	aftB_L162V	aftB	p.Leu162Val	False
149	aftB_L16P	AMI	3	nan	aftB_L16P	aftB	p.Leu16Pro	False
150	aftB_L270M	AMI	3	nan	aftB_L270M	aftB	p.Leu270Met	False
151	aftB_L290V	AMI	3	nan	aftB_L290V	aftB	p.Leu290Val	False
152	aftB_L86M	AMI	3	nan	aftB_L86M	aftB	p.Leu86Met	False
153	aftB_M1I	AMI	3	nan	aftB_M1I	aftB	p.Met1Ile	False
154	aftB_M1K	AMI	3	nan	aftB_M1K	aftB	p.Met1Lys	False
155	aftB_M395I	AMI	3	nan	aftB_M395I	aftB	p.Met395Ile	False
156	aftB_N259H	AMI	3	nan	aftB_N259H	aftB	p.Asn259His	False
157	aftB_N50S	AMI	3	nan	aftB_N50S	aftB	p.Asn50Ser	False
158	aftB_P108T	AMI	3	nan	aftB_P108T	aftB	p.Pro108Thr	False
159	aftB_P129S	AMI	3	nan	aftB_P129S	aftB	p.Pro129Ser	False
160	aftB_P130L	AMI	3	nan	aftB_P130L	aftB	p.Pro130Leu	False
161	aftB_P161S	AMI	3	nan	aftB_P161S	aftB	p.Pro161Ser	False
162	aftB_P309R	AMI	3	nan	aftB_P309R	aftB	p.Pro309Arg	False
163	aftB_P342S	AMI	3	nan	aftB_P342S	aftB	p.Pro342Ser	False
164	aftB_P349R	AMI	3	nan	aftB_P349R	aftB	p.Pro349Arg	False
165	aftB_P358L	AMI	3	nan	aftB_P358L	aftB	p.Pro358Leu	False
166	aftB_P423L	AMI	3	nan	aftB_P423L	aftB	p.Pro423Leu	False
167	aftB_P446L	AMI	3	nan	aftB_P446L	aftB	p.Pro446Leu	False
168	aftB_P446R	AMI	3	nan	aftB_P446R	aftB	p.Pro446Arg	False
169	aftB_P478S	AMI	3	nan	aftB_P478S	aftB	p.Pro478Ser	False
170	aftB_P513A	AMI	3	nan	aftB_P513A	aftB	p.Pro513Ala	False
171	aftB_P513S	AMI	3	nan	aftB_P513S	aftB	p.Pro513Ser	False
172	aftB_P534Q	AMI	3	nan	aftB_P534Q	aftB	p.Pro534Gln	False
173	aftB_P76Q	AMI	3	nan	aftB_P76Q	aftB	p.Pro76Gln	False
174	aftB_Q169P	AMI	3	nan	aftB_Q169P	aftB	p.Gln169Pro	False
175	aftB_Q225E	AMI	3	nan	aftB_Q225E	aftB	p.Gln225Glu	False
176	aftB_Q306R	AMI	3	nan	aftB_Q306R	aftB	p.Gln306Arg	False
177	aftB_Q483H	AMI	3	nan	aftB_Q483H	aftB	p.Gln483His	False
178	aftB_R114W	AMI	3	nan	aftB_R114W	aftB	p.Arg114Trp	False
179	aftB_R132L	AMI	3	nan	aftB_R132L	aftB	p.Arg132Leu	False
180	aftB_R25S	AMI	3	nan	aftB_R25S	aftB	p.Arg25Ser	False
181	aftB_R284H	AMI	3	nan	aftB_R284H	aftB	p.Arg284His	False
182	aftB_R303L	AMI	3	nan	aftB_R303L	aftB	p.Arg303Leu	False
183	aftB_R39H	AMI	3	nan	aftB_R39H	aftB	p.Arg39His	False
184	aftB_R401W	AMI	3	nan	aftB_R401W	aftB	p.Arg401Trp	False
185	aftB_R411H	AMI	3	nan	aftB_R411H	aftB	p.Arg411His	False
186	aftB_R412H	AMI	3	nan	aftB_R412H	aftB	p.Arg412His	False
187	aftB_R467Q	AMI	3	nan	aftB_R467Q	aftB	p.Arg467Gln	False
188	aftB_R503Q	AMI	3	nan	aftB_R503Q	aftB	p.Arg503Gln	False
189	aftB_R54Q	AMI	3	nan	aftB_R54Q	aftB	p.Arg54Gln	False
190	aftB_R579C	AMI	3	nan	aftB_R579C	aftB	p.Arg579Cys	False
191	aftB_S141C	AMI	3	nan	aftB_S141C	aftB	p.Ser141Cys	False
192	aftB_S159A	AMI	3	nan	aftB_S159A	aftB	p.Ser159Ala	False
193	aftB_S238G	AMI	3	nan	aftB_S238G	aftB	p.Ser238Gly	False
194	aftB_S405W	AMI	3	nan	aftB_S405W	aftB	p.Ser405Trp	False
195	aftB_S594F	AMI	3	nan	aftB_S594F	aftB	p.Ser594Phe	False
196	aftB_S91A	AMI	3	nan	aftB_S91A	aftB	p.Ser91Ala	False
197	aftB_T102I	AMI	3	nan	aftB_T102I	aftB	p.Thr102Ile	False
198	aftB_t-14c	AMI	3	4268850	aftB_t-14c	aftB	c.-14T>C	False
199	aftB_T445I	AMI	3	nan	aftB_T445I	aftB	p.Thr445Ile	False
200	aftB_t-9c	AMI	3	4268845	aftB_t-9c	aftB	c.-9T>C	False
201	aftB_V144M	AMI	3	nan	aftB_V144M	aftB	p.Val144Met	False
202	aftB_V156L	AMI	3	nan	aftB_V156L	aftB	p.Val156Leu	False
203	aftB_V15M	AMI	3	nan	aftB_V15M	aftB	p.Val15Met	False
204	aftB_V211G	AMI	3	nan	aftB_V211G	aftB	p.Val211Gly	False
205	aftB_V2A	AMI	3	nan	aftB_V2A	aftB	p.Val2Ala	False
206	aftB_V316A	AMI	3	nan	aftB_V316A	aftB	p.Val316Ala	False
207	aftB_V350A	AMI	3	nan	aftB_V350A	aftB	p.Val350Ala	False
208	aftB_V55I	AMI	3	nan	aftB_V55I	aftB	p.Val55Ile	False
209	aftB_V574L	AMI	3	nan	aftB_V574L	aftB	p.Val574Leu	False
210	aftB_W19C	AMI	3	nan	aftB_W19C	aftB	p.Trp19Cys	False
211	aftB_W63S	AMI	3	nan	aftB_W63S	aftB	p.Trp63Ser	False
212	aftB_W63Y	AMI	3	nan	aftB_W63Y	aftB	p.Trp63Tyr	False
213	aftB_Y81H	AMI	3	nan	aftB_Y81H	aftB	p.Tyr81His	False
214	ccsA_268_del_1_ct_t	AMI	3	620158	ccsA_268_del_1_ct_t			True
215	ccsA_A11V	AMI	3	nan	ccsA_A11V	ccsA	p.Ala11Val	False
216	ccsA_A124T	AMI	3	nan	ccsA_A124T	ccsA	p.Ala124Thr	False
217	ccsA_A189T	AMI	3	nan	ccsA_A189T	ccsA	p.Ala189Thr	False
218	ccsA_A213V	AMI	3	nan	ccsA_A213V	ccsA	p.Ala213Val	False
219	ccsA_A248V	AMI	3	nan	ccsA_A248V	ccsA	p.Ala248Val	False
220	ccsA_A281E	AMI	3	nan	ccsA_A281E	ccsA	p.Ala281Glu	False
221	ccsA_A298S	AMI	3	nan	ccsA_A298S	ccsA	p.Ala298Ser	False
222	ccsA_A298V	AMI	3	nan	ccsA_A298V	ccsA	p.Ala298Val	False
223	ccsA_A33V	AMI	3	nan	ccsA_A33V	ccsA	p.Ala33Val	False
224	ccsA_A48V	AMI	3	nan	ccsA_A48V	ccsA	p.Ala48Val	False
225	ccsA_A55V	AMI	3	nan	ccsA_A55V	ccsA	p.Ala55Val	False
226	ccsA_c-144a	AMI	3	619747	ccsA_c-144a (Rv0528_481)	ccsA	c.-144C>A	False
227	ccsA_c-191t	AMI	3	619700	ccsA_c-191t (Rv0528_466)	ccsA	c.-191C>T	False
228	ccsA_c-96g	AMI	3	619795	ccsA_c-96g (Rv0528_497)	ccsA	c.-96C>G	False
229	ccsA_c-99t	AMI	3	619792	ccsA_c-99t (Rv0528_496)	ccsA	c.-99C>T	False
230	ccsA_F140L	AMI	3	nan	ccsA_F140L	ccsA	p.Phe140Leu	False
231	ccsA_F186S	AMI	3	nan	ccsA_F186S	ccsA	p.Phe186Ser	False
232	ccsA_F237L	AMI	3	nan	ccsA_F237L	ccsA	p.Phe237Leu	False
233	ccsA_F305V	AMI	3	nan	ccsA_F305V	ccsA	p.Phe305Val	False
234	ccsA_F308L	AMI	3	nan	ccsA_F308L	ccsA	p.Phe308Leu	False
235	ccsA_g-100a	AMI	3	619791	ccsA_g-100a (Rv0528_496)	ccsA	c.-100G>A	False
236	ccsA_g-106c	AMI	3	619785	ccsA_g-106c (Rv0528_494)	ccsA	c.-106G>C	False
237	ccsA_g-107a	AMI	3	619784	ccsA_g-107a (Rv0528_494)	ccsA	c.-107G>A	False
238	ccsA_g-143a	AMI	3	619748	ccsA_g-143a (Rv0528_482)	ccsA	c.-143G>A	False
239	ccsA_g-149a	AMI	3	619742	ccsA_g-149a (Rv0528_480)	ccsA	c.-149G>A	False
240	ccsA_g-162a	AMI	3	619729	ccsA_g-162a (Rv0528_475)	ccsA	c.-162G>A	False
241	ccsA_G324S	AMI	3	nan	ccsA_G324S	ccsA	p.Gly324Ser	False
242	ccsA_G52R	AMI	3	nan	ccsA_G52R	ccsA	p.Gly52Arg	False
243	ccsA_g-5a	AMI	3	619886	ccsA_g-5a (Rv0528_528)	ccsA	c.-5G>A	False
244	ccsA_g-77a	AMI	3	619814	ccsA_g-77a (Rv0528_504)	ccsA	c.-77G>A	False
245	ccsA_g-85a	AMI	3	619806	ccsA_g-85a (Rv0528_501)	ccsA	c.-85G>A	False
246	ccsA_g-89a	AMI	3	619802	ccsA_g-89a (Rv0528_500)	ccsA	c.-89G>A	False
247	ccsA_g-93c	AMI	3	619798	ccsA_g-93c (Rv0528_498)	ccsA	c.-93G>C	False
248	ccsA_G99A	AMI	3	nan	ccsA_G99A	ccsA	p.Gly99Ala	False
249	ccsA_G9S	AMI	3	nan	ccsA_G9S	ccsA	p.Gly9Ser	False
250	ccsA_H5N	AMI	3	nan	ccsA_H5N	ccsA	p.His5Asn	False
251	ccsA_H69R	AMI	3	nan	ccsA_H69R	ccsA	p.His69Arg	False
252	ccsA_I123A	AMI	3	nan	ccsA_I123A	ccsA	p.Ile123Ala	False
253	ccsA_I63V	AMI	3	nan	ccsA_I63V	ccsA	p.Ile63Val	False
254	ccsA_L119F	AMI	3	nan	ccsA_L119F	ccsA	p.Leu119Phe	False
255	ccsA_L141V	AMI	3	nan	ccsA_L141V	ccsA	p.Leu141Val	False
256	ccsA_L279V	AMI	3	nan	ccsA_L279V	ccsA	p.Leu279Val	False
257	ccsA_L4M	AMI	3	nan	ccsA_L4M	ccsA	p.Leu4Met	False
258	ccsA_M164I	AMI	3	nan	ccsA_M164I	ccsA	p.Met164Ile	False
259	ccsA_N296S	AMI	3	nan	ccsA_N296S	ccsA	p.Asn296Ser	False
260	ccsA_P46S	AMI	3	nan	ccsA_P46S	ccsA	p.Pro46Ser	False
261	ccsA_P61S	AMI	3	nan	ccsA_P61S	ccsA	p.Pro61Ser	False
262	ccsA_P71L	AMI	3	nan	ccsA_P71L	ccsA	p.Pro71Leu	False
263	ccsA_R131K	AMI	3	nan	ccsA_R131K	ccsA	p.Arg131Lys	False
264	ccsA_R202G	AMI	3	nan	ccsA_R202G	ccsA	p.Arg202Gly	False
265	ccsA_R217W	AMI	3	nan	ccsA_R217W	ccsA	p.Arg217Trp	False
266	ccsA_R288Q	AMI	3	nan	ccsA_R288Q	ccsA	p.Arg288Gln	False
267	ccsA_T200I	AMI	3	nan	ccsA_T200I	ccsA	p.Thr200Ile	False
268	ccsA_T232A	AMI	3	nan	ccsA_T232A	ccsA	p.Thr232Ala	False
269	ccsA_T314A	AMI	3	nan	ccsA_T314A	ccsA	p.Thr314Ala	False
270	ccsA_V239I	AMI	3	nan	ccsA_V239I	ccsA	p.Val239Ile	False
271	ccsA_V270I	AMI	3	nan	ccsA_V270I	ccsA	p.Val270Ile	False
272	ccsA_V301L	AMI	3	nan	ccsA_V301L	ccsA	p.Val301Leu	False
273	ccsA_V6F	AMI	3	nan	ccsA_V6F	ccsA	p.Val6Phe	False
274	ccsA_Y111H	AMI	3	nan	ccsA_Y111H	ccsA	p.Tyr111His	False
275	ccsA_Y275H	AMI	3	nan	ccsA_Y275H	ccsA	p.Tyr275His	False
276	eis_15_ins_1_cagggtcacagtcacagaatccgactgtg_ccagggtcacagtcacagaatccgactgta	AMI	3	2715318	eis_15_ins_1_cagggtcacagtcacagaatccgactgtg_ccagggtcacagtcacagaatccgactgta			True
277	eis_279_del_11_ccggcgatgcgt_c	AMI	3	2715054	eis_279_del_11_ccggcgatgcgt_c	eis	c.268_278del	False
278	eis_-36_del_18_acgtgaatattacgacgac_a	AMI	3	2715368	eis_-36_del_18_acgtgaatattacgacgac_a	eis	c.-54_-37del	False
279	eis_367_del_4_cctcg_c	AMI	3	2714966	eis_367_del_4_cctcg_c	eis	c.363_366del	False
280	eis_400_ins_1_c_cg	AMI	3	2714933	eis_400_ins_1_c_cg	eis	c.399_400insC	False
281	eis_5_del_6_gtcacagaatccgactgtg_gaatccgactgta	AMI	3	2715328	eis_5_del_6_gtcacagaatccgactgtg_gaatccgactgta			True
282	eis_571_ins_1_g_gc	AMI	3	2714762	eis_571_ins_1_g_gc	eis	c.570_571insG	False
283	eis_627_ins_1_a_ac	AMI	3	2714706	eis_627_ins_1_a_ac	eis	c.626_627insG	False
284	eis_808_del_2_gggtga_ggga	AMI	3	2714525	eis_808_del_2_gggtga_ggga	eis	c.805_806del|c.804_805del	False
285	eis_953_del_1_ga_g	AMI	3	2714380	eis_953_del_1_ga_g	eis	c.952del	False
286	eis_A151P	AMI	3	nan	eis_A151P	eis	p.Ala151Pro	False
287	eis_A151V	AMI	3	nan	eis_A151V	eis	p.Ala151Val	False
288	eis_A202P	AMI	3	nan	eis_A202P	eis	p.Ala202Pro	False
289	eis_A207T	AMI	3	nan	eis_A207T	eis	p.Ala207Thr	False
290	eis_A21E	AMI	3	nan	eis_A21E	eis	p.Ala21Glu	False
291	eis_A243T	AMI	3	nan	eis_A243T	eis	p.Ala243Thr	False
292	eis_A251G	AMI	3	nan	eis_A251G	eis	p.Ala251Gly	False
293	eis_A285V	AMI	3	nan	eis_A285V	eis	p.Ala285Val	False
294	eis_A338T	AMI	3	nan	eis_A338T	eis	p.Ala338Thr	False
295	eis_a-33g	AMI	3	2715365	eis_a-33g	eis	c.-33A>G	False
296	eis_A370S	AMI	3	nan	eis_A370S	eis	p.Ala370Ser	False
297	eis_A370V	AMI	3	nan	eis_A370V	eis	p.Ala370Val	False
298	eis_A371S	AMI	3	nan	eis_A371S	eis	p.Ala371Ser	False
299	eis_a-39g	AMI	3	2715371	eis_a-39g	eis	c.-39A>G	False
300	eis_A62V	AMI	3	nan	eis_A62V	eis	p.Ala62Val	False
301	eis_c-15t	AMI	3	2715347	eis_c-15t	eis	c.-15C>T	False
302	eis_c-21t	AMI	3	2715353	eis_c-21t	eis	c.-21C>T	False
303	eis_c-2g	AMI	3	2715334	eis_c-2g	eis	c.-2C>G	False
304	eis_C6Y	AMI	3	nan	eis_C6Y	eis	p.Cys6Tyr	False
305	eis_D152N	AMI	3	nan	eis_D152N	eis	p.Asp152Asn	False
306	eis_D26Y	AMI	3	nan	eis_D26Y	eis	p.Asp26Tyr	False
307	eis_D273A	AMI	3	nan	eis_D273A	eis	p.Asp273Ala	False
308	eis_D281G	AMI	3	nan	eis_D281G	eis	p.Asp281Gly	False
309	eis_D352G	AMI	3	nan	eis_D352G	eis	p.Asp352Gly	False
310	eis_D354N	AMI	3	nan	eis_D354N	eis	p.Asp354Asn	False
311	eis_E103K	AMI	3	nan	eis_E103K	eis	p.Glu103Lys	False
312	eis_E10K	AMI	3	nan	eis_E10K	eis	p.Glu10Lys	False
313	eis_E199G	AMI	3	nan	eis_E199G	eis	p.Glu199Gly	False
314	eis_E348D	AMI	3	nan	eis_E348D	eis	p.Glu348Asp	False
315	eis_E348K	AMI	3	nan	eis_E348K	eis	p.Glu348Lys	False
316	eis_F129L	AMI	3	nan	eis_F129L	eis	p.Phe129Leu	False
317	eis_F84Y	AMI	3	nan	eis_F84Y	eis	p.Phe84Tyr	False
318	eis_G156C	AMI	3	nan	eis_G156C	eis	p.Gly156Cys	False
319	eis_g-16a	AMI	3	2715348	eis_g-16a	eis	c.-16G>A	False
320	eis_g-16c	AMI	3	2715348	eis_g-16c	eis	c.-16G>C	False
321	eis_G222A	AMI	3	nan	eis_G222A	eis	p.Gly222Ala	False
322	eis_G222R	AMI	3	nan	eis_G222R	eis	p.Gly222Arg	False
323	eis_g-23c	AMI	3	2715355	eis_g-23c	eis	c.-23G>C	False
324	eis_G258S	AMI	3	nan	eis_G258S	eis	p.Gly258Ser	False
325	eis_G309D	AMI	3	nan	eis_G309D	eis	p.Gly309Asp	False
326	eis_g-54a	AMI	3	2715386	eis_g-54a	eis	c.-54G>A	False
327	eis_H105Y	AMI	3	nan	eis_H105Y	eis	p.His105Tyr	False
328	eis_H150T	AMI	3	nan	eis_H150T	eis	p.His150Thr	False
329	eis_H249R	AMI	3	nan	eis_H249R	eis	p.His249Arg	False
330	eis_I267T	AMI	3	nan	eis_I267T	eis	p.Ile267Thr	False
331	eis_K234M	AMI	3	nan	eis_K234M	eis	p.Lys234Met	False
332	eis_K234N	AMI	3	nan	eis_K234N	eis	p.Lys234Asn	False
333	eis_L18P	AMI	3	nan	eis_L18P	eis	p.Leu18Pro	False
334	eis_L200V	AMI	3	nan	eis_L200V	eis	p.Leu200Val	False
335	eis_L375S	AMI	3	nan	eis_L375S	eis	p.Leu375Ser	False
336	eis_L77P	AMI	3	nan	eis_L77P	eis	p.Leu77Pro	False
337	eis_M100V	AMI	3	nan	eis_M100V	eis	p.Met100Val	False
338	eis_M351V	AMI	3	nan	eis_M351V	eis	p.Met351Val	False
339	eis_P114L	AMI	3	nan	eis_P114L	eis	p.Pro114Leu	False
340	eis_P208L	AMI	3	nan	eis_P208L	eis	p.Pro208Leu	False
341	eis_P274L	AMI	3	nan	eis_P274L	eis	p.Pro274Leu	False
342	eis_P276S	AMI	3	nan	eis_P276S	eis	p.Pro276Ser	False
343	eis_P302Q	AMI	3	nan	eis_P302Q	eis	p.Pro302Gln	False
344	eis_P30L	AMI	3	nan	eis_P30L	eis	p.Pro30Leu	False
345	eis_P72L	AMI	3	nan	eis_P72L	eis	p.Pro72Leu	False
346	eis_P78S	AMI	3	nan	eis_P78S	eis	p.Pro78Ser	False
347	eis_R106L	AMI	3	nan	eis_R106L	eis	p.Arg106Leu	False
348	eis_R212H	AMI	3	nan	eis_R212H	eis	p.Arg212His	False
349	eis_R254Q	AMI	3	nan	eis_R254Q	eis	p.Arg254Gln	False
350	eis_R297C	AMI	3	nan	eis_R297C	eis	p.Arg297Cys	False
351	eis_R376C	AMI	3	nan	eis_R376C	eis	p.Arg376Cys	False
352	eis_R49C	AMI	3	nan	eis_R49C	eis	p.Arg49Cys	False
353	eis_R92C	AMI	3	nan	eis_R92C	eis	p.Arg92Cys	False
354	eis_S111Y	AMI	3	nan	eis_S111Y	eis	p.Ser111Tyr	False
355	eis_S23G	AMI	3	nan	eis_S23G	eis	p.Ser23Gly	False
356	eis_S358R	AMI	3	nan	eis_S358R	eis	p.Ser358Arg	False
357	eis_S367P	AMI	3	nan	eis_S367P	eis	p.Ser367Pro	False
358	eis_S56C	AMI	3	nan	eis_S56C	eis	p.Ser56Cys	False
359	eis_S56P	AMI	3	nan	eis_S56P	eis	p.Ser56Pro	False
360	eis_S83T	AMI	3	nan	eis_S83T	eis	p.Ser83Thr	False
361	eis_T169I	AMI	3	nan	eis_T169I	eis	p.Thr169Ile	False
362	eis_t-1g	AMI	3	2715333	eis_t-1g	eis	c.-1T>G	False
363	eis_T287A	AMI	3	nan	eis_T287A	eis	p.Thr287Ala	False
364	eis_T38A	AMI	3	nan	eis_T38A	eis	p.Thr38Ala	False
365	eis_T398N	AMI	3	nan	eis_T398N	eis	p.Thr398Asn	False
366	eis_V115A	AMI	3	nan	eis_V115A	eis	p.Val115Ala	False
367	eis_V314L	AMI	3	nan	eis_V314L	eis	p.Val314Leu	False
368	eis_V396I	AMI	3	nan	eis_V396I	eis	p.Val396Ile	False
369	eis_V3A	AMI	3	nan	eis_V3A	eis	p.Val3Ala	False
370	eis_W182!	AMI	3	nan	eis_W182!	eis	p.Trp182*	False
371	eis_W253R	AMI	3	nan	eis_W253R	eis	p.Trp253Arg	False
372	eis_W36!	AMI	3	nan	eis_W36!	eis	p.Trp36*	False
373	fprA_260_del_5_acgtcc_a	AMI	3	3474266	fprA_260_del_5_acgtcc_a	fprA	c.261_265del	False
374	fprA_36_del_1_gc_g	AMI	3	3474042	fprA_36_del_1_gc_g	fprA	c.37del	False
375	fprA_373_del_1_gc_g	AMI	3	3474379	fprA_373_del_1_gc_g	fprA	c.374del	False
376	fprA_433_del_1_ct_c	AMI	3	3474439	fprA_433_del_1_ct_c	fprA	c.434del	False
377	fprA_693_ins_1_c_cg	AMI	3	3474699	fprA_693_ins_1_c_cg	fprA	c.693_694insG	False
378	fprA_806_del_182_tccggttcttgacctctccgatcgagatcaagggcaagcgcaaagtggag_t	AMI	3	3474812	fprA_806_del_182_tccggttcttgacctctccgatcgagatcaagggcaagcgcaaagtggag_t	fprA	c.807_988del	False
379	fprA_838_del_6_ggcaagc_g	AMI	3	3474844	fprA_838_del_6_ggcaagc_g	fprA	c.839_844del	False
380	fprA_A256G	AMI	3	nan	fprA_A256G	fprA	p.Ala256Gly	False
381	fprA_A35V	AMI	3	nan	fprA_A35V	fprA	p.Ala35Val	False
382	fprA_A407P	AMI	3	nan	fprA_A407P	fprA	p.Ala407Pro	False
383	fprA_A412S	AMI	3	nan	fprA_A412S	fprA	p.Ala412Ser	False
384	fprA_A412T	AMI	3	nan	fprA_A412T	fprA	p.Ala412Thr	False
385	fprA_A432S	AMI	3	nan	fprA_A432S	fprA	p.Ala432Ser	False
386	fprA_D109A	AMI	3	nan	fprA_D109A	fprA	p.Asp109Ala	False
387	fprA_D177H	AMI	3	nan	fprA_D177H	fprA	p.Asp177His	False
388	fprA_D257G	AMI	3	nan	fprA_D257G	fprA	p.Asp257Gly	False
389	fprA_D306G	AMI	3	nan	fprA_D306G	fprA	p.Asp306Gly	False
390	fprA_D37E	AMI	3	nan	fprA_D37E	fprA	p.Asp37Glu	False
391	fprA_D404A	AMI	3	nan	fprA_D404A	fprA	p.Asp404Ala	False
392	fprA_D98E	AMI	3	nan	fprA_D98E	fprA	p.Asp98Glu	False
393	fprA_E117D	AMI	3	nan	fprA_E117D	fprA	p.Glu117Asp	False
394	fprA_E139A	AMI	3	nan	fprA_E139A	fprA	p.Glu139Ala	False
395	fprA_E193K	AMI	3	nan	fprA_E193K	fprA	p.Glu193Lys	False
396	fprA_E236K	AMI	3	nan	fprA_E236K	fprA	p.Glu236Lys	False
397	fprA_E354K	AMI	3	nan	fprA_E354K	fprA	p.Glu354Lys	False
398	fprA_E394D	AMI	3	nan	fprA_E394D	fprA	p.Glu394Asp	False
399	fprA_E394K	AMI	3	nan	fprA_E394K	fprA	p.Glu394Lys	False
400	fprA_E400D	AMI	3	nan	fprA_E400D	fprA	p.Glu400Asp	False
401	fprA_E430D	AMI	3	nan	fprA_E430D	fprA	p.Glu430Asp	False
402	fprA_E430K	AMI	3	nan	fprA_E430K	fprA	p.Glu430Lys	False
403	fprA_E68K	AMI	3	nan	fprA_E68K	fprA	p.Glu68Lys	False
404	fprA_F334L	AMI	3	nan	fprA_F334L	fprA	p.Phe334Leu	False
405	fprA_F78L	AMI	3	nan	fprA_F78L	fprA	p.Phe78Leu	False
406	fprA_g-106a	AMI	3	3473901	fprA_g-106a (prfB_2)	fprA	c.-106G>A	False
407	fprA_g-114t	AMI	3	3473893	fprA_g-114t (prfB_4)	fprA	c.-114G>T	False
408	fprA_G12R	AMI	3	nan	fprA_G12R	fprA	p.Gly12Arg	False
409	fprA_g-130t	AMI	3	3473877	fprA_g-130t (prfB_10)	fprA	c.-130G>T	False
410	fprA_g-147a	AMI	3	3473860	fprA_g-147a (prfB_15)	fprA	c.-147G>A	False
411	fprA_G198E	AMI	3	nan	fprA_G198E	fprA	p.Gly198Glu	False
412	fprA_G201D	AMI	3	nan	fprA_G201D	fprA	p.Gly201Asp	False
413	fprA_G290S	AMI	3	nan	fprA_G290S	fprA	p.Gly290Ser	False
414	fprA_G298S	AMI	3	nan	fprA_G298S	fprA	p.Gly298Ser	False
415	fprA_G300R	AMI	3	nan	fprA_G300R	fprA	p.Gly300Arg	False
416	fprA_G326R	AMI	3	nan	fprA_G326R	fprA	p.Gly326Arg	False
417	fprA_G438A	AMI	3	nan	fprA_G438A	fprA	p.Gly438Ala	False
418	fprA_G91D	AMI	3	nan	fprA_G91D	fprA	p.Gly91Asp	False
419	fprA_H137N	AMI	3	nan	fprA_H137N	fprA	p.His137Asn	False
420	fprA_H181Y	AMI	3	nan	fprA_H181Y	fprA	p.His181Tyr	False
421	fprA_I101N	AMI	3	nan	fprA_I101N	fprA	p.Ile101Asn	False
422	fprA_I233S	AMI	3	nan	fprA_I233S	fprA	p.Ile233Ser	False
423	fprA_K246Q	AMI	3	nan	fprA_K246Q	fprA	p.Lys246Gln	False
424	fprA_K250T	AMI	3	nan	fprA_K250T	fprA	p.Lys250Thr	False
425	fprA_L252R	AMI	3	nan	fprA_L252R	fprA	p.Leu252Arg	False
426	fprA_L332P	AMI	3	nan	fprA_L332P	fprA	p.Leu332Pro	False
427	fprA_L450P	AMI	3	nan	fprA_L450P	fprA	p.Leu450Pro	False
428	fprA_M267I	AMI	3	nan	fprA_M267I	fprA	p.Met267Ile	False
429	fprA_N292S	AMI	3	nan	fprA_N292S	fprA	p.Asn292Ser	False
430	fprA_P13S	AMI	3	nan	fprA_P13S	fprA	p.Pro13Ser	False
431	fprA_P342T	AMI	3	nan	fprA_P342T	fprA	p.Pro342Thr	False
432	fprA_P3H	AMI	3	nan	fprA_P3H	fprA	p.Pro3His	False
433	fprA_Q316E	AMI	3	nan	fprA_Q316E	fprA	p.Gln316Glu	False
434	fprA_Q405P	AMI	3	nan	fprA_Q405P	fprA	p.Gln405Pro	False
435	fprA_Q405R	AMI	3	nan	fprA_Q405R	fprA	p.Gln405Arg	False
436	fprA_R149Q	AMI	3	nan	fprA_R149Q	fprA	p.Arg149Gln	False
437	fprA_R187H	AMI	3	nan	fprA_R187H	fprA	p.Arg187His	False
438	fprA_R265H	AMI	3	nan	fprA_R265H	fprA	p.Arg265His	False
439	fprA_R282L	AMI	3	nan	fprA_R282L	fprA	p.Arg282Leu	False
440	fprA_R325C	AMI	3	nan	fprA_R325C	fprA	p.Arg325Cys	False
441	fprA_S11F	AMI	3	nan	fprA_S11F	fprA	p.Ser11Phe	False
442	fprA_S21C	AMI	3	nan	fprA_S21C	fprA	p.Ser21Cys	False
443	fprA_S274Y	AMI	3	nan	fprA_S274Y	fprA	p.Ser274Tyr	False
444	fprA_S446I	AMI	3	nan	fprA_S446I	fprA	p.Ser446Ile	False
445	fprA_t-161g	AMI	3	3473846	fprA_t-161g (prfB_20)	fprA	c.-161T>G	False
446	fprA_T307I	AMI	3	nan	fprA_T307I	fprA	p.Thr307Ile	False
447	fprA_T44I	AMI	3	nan	fprA_T44I	fprA	p.Thr44Ile	False
448	fprA_V100L	AMI	3	nan	fprA_V100L	fprA	p.Val100Leu	False
449	fprA_V126I	AMI	3	nan	fprA_V126I	fprA	p.Val126Ile	False
450	fprA_V151I	AMI	3	nan	fprA_V151I	fprA	p.Val151Ile	False
451	fprA_V152G	AMI	3	nan	fprA_V152G	fprA	p.Val152Gly	False
452	fprA_V162A	AMI	3	nan	fprA_V162A	fprA	p.Val162Ala	False
453	fprA_V197I	AMI	3	nan	fprA_V197I	fprA	p.Val197Ile	False
454	fprA_V244G	AMI	3	nan	fprA_V244G	fprA	p.Val244Gly	False
455	fprA_V251M	AMI	3	nan	fprA_V251M	fprA	p.Val251Met	False
456	fprA_V319M	AMI	3	nan	fprA_V319M	fprA	p.Val319Met	False
457	fprA_V406L	AMI	3	nan	fprA_V406L	fprA	p.Val406Leu	False
458	fprA_V425M	AMI	3	nan	fprA_V425M	fprA	p.Val425Met	False
459	fprA_V442L	AMI	3	nan	fprA_V442L	fprA	p.Val442Leu	False
460	fprA_V88I	AMI	3	nan	fprA_V88I	fprA	p.Val88Ile	False
461	fprA_V9A	AMI	3	nan	fprA_V9A	fprA	p.Val9Ala	False
462	fprA_V9M	AMI	3	nan	fprA_V9M	fprA	p.Val9Met	False
463	fprA_W46!	AMI	3	nan	fprA_W46!	fprA	p.Trp46*	False
464	fprA_Y97H	AMI	3	nan	fprA_Y97H	fprA	p.Tyr97His	False
465	rrs_1108_ins_1_gtctcat_gtctccat	AMI	3	1472953	rrs_1108_ins_1_gtctcat_gtctccat	rrs	c.1111_1112insC|c.1112_1113insC	False
466	rrs_-118_del_1_at_a	AMI	3	1471728	rrs_-118_del_1_at_a	rrs	c.-117del	False
467	rrs_1258_ins_1_gcgaggttaagcgaatcctta_gtgaggtggagcgaatcctttc	AMI	3	1473103	rrs_1258_ins_1_gcgaggttaagcgaatcctta_gtgaggtggagcgaatcctttc			True
468	rrs_1444_ins_1_tcggga_tttgggg	AMI	3	1473289	rrs_1444_ins_1_tcggga_tttgggg			True
469	rrs_182_del_2_cacgggatgcatgtcttgtggtggaaagcgctttagcggtgtgggatgag_cgcgcatcgcatggtgtgtggtggaaagcttttgcggtgtgggatgggcc	AMI	3	1472027	rrs_182_del_2_cacgggatgcatgtcttgtggtggaaagcgctttagcggtgtgggatgag_cgcgcatcgcatggtgtgtggtggaaagcttttgcggtgtgggatgggcc			True
470	rrs_-191_del_7_gggtcgccc_gg	AMI	3	1471655	rrs_-191_del_7_gggtcgccc_gg	rrs	c.-189_-183del	False
471	rrs_-211_del_1_ggatttgtattagactggcagggtc_ggtttgtattagactggcagggtt	AMI	3	1471635	rrs_-211_del_1_ggatttgtattagactggcagggtc_ggtttgtattagactggcagggtt			True
472	rrs_-236_del_1_cga_cg	AMI	3	1471610	rrs_-236_del_1_cga_cg	rrs	c.-234del	False
473	rrs_-252_ins_6_g_gatatct	AMI	3	1471594	rrs_-252_ins_6_g_gatatct	rrs	c.-252_-251insATATCT	False
474	rrs_298_ins_1_g_gt	AMI	3	1472143	rrs_298_ins_1_g_gt	rrs	c.298_299insT	False
475	rrs_301_ins_2_g_ggt	AMI	3	1472146	rrs_301_ins_2_g_ggt	rrs	c.301_302insGT	False
476	rrs_4_ins_1_tgt_ttgg	AMI	3	1471849	rrs_4_ins_1_tgt_ttgg			True
477	rrs_405_del_12_gggggatgacggccttcgggttgtaaacctctttcaccatcgacgaaggt_gagggatgacggccttcgggttgtaaacctctgttagcagggaagaagag	AMI	3	1472250	rrs_405_del_12_gggggatgacggccttcgggttgtaaacctctttcaccatcgacgaaggt_gagggatgacggccttcgggttgtaaacctctgttagcagggaagaagag			True
478	rrs_474_ins_3_c_cggt	AMI	3	1472319	rrs_474_ins_3_c_cggt	rrs	c.474_475insGGT	False
479	rrs_533_ins_1_gtgcgagcgttgtccggaattactgggcgtaaagagctcgtaggtggttt_gcgcgagcgttgtccggaattattgggcgtaaagagcttgtaggcggttt	AMI	3	1472378	rrs_533_ins_1_gtgcgagcgttgtccggaattactgggcgtaaagagctcgtaggtggttt_gcgcgagcgttgtccggaattattgggcgtaaagagcttgtaggcggttt			True
480	rrs_555_ins_1_c_ct	AMI	3	1472400	rrs_555_ins_1_c_ct	rrs	c.555_556insT	False
481	rrs_-58_ins_1_g_gt	AMI	3	1471788	rrs_-58_ins_1_g_gt	rrs	c.-58_-57insT	False
482	rrs_591_ins_1_g_gt	AMI	3	1472436	rrs_591_ins_1_g_gt	rrs	c.591_592insT	False
483	rrs_-75_del_1_cg_c	AMI	3	1471771	rrs_-75_del_1_cg_c	rrs	c.-74del	False
484	rrs_77_del_1_gtctcttcgga_gtctctttga	AMI	3	1471922	rrs_77_del_1_gtctcttcgga_gtctctttga			True
485	rrs_-80_del_1_gttgtcg_gttgtc	AMI	3	1471766	rrs_-80_del_1_gttgtcg_gttgtc	rrs	c.-74del	False
486	rrs_88_ins_1_gatac_gatact	AMI	3	1471933	rrs_88_ins_1_gatac_gatact	rrs	c.92_93insT	False
487	rrs_908_ins_1_a_at	AMI	3	1472753	rrs_908_ins_1_a_at	rrs	c.908_909insT	False
488	rrs_978_ins_1_ctgggtttgacatgcacaggacgcgtctagagataggcgttcccttgtgg_caaggcttgacatatactggaccgcatcagagatggtgtttcccttcggg	AMI	3	1472823	rrs_978_ins_1_ctgggtttgacatgcacaggacgcgtctagagataggcgttcccttgtgg_caaggcttgacatatactggaccgcatcagagatggtgtttcccttcggg			True
489	rrs_a1058g	AMI	3	1472903	rrs_a1058g	rrs	n.1058A>G	False
490	rrs_a1128t	AMI	3	1472973	rrs_a1128t	rrs	n.1128A>T	False
491	rrs_a115g	AMI	3	1471960	rrs_a115g	rrs	n.115A>G	False
492	rrs_a1171c	AMI	3	1473016	rrs_a1171c	rrs	n.1171A>C	False
493	rrs_a1211t	AMI	3	1473056	rrs_a1211t	rrs	n.1211A>T	False
494	rrs_a1221g	AMI	3	1473066	rrs_a1221g	rrs	n.1221A>G	False
495	rrs_a1243g	AMI	3	1473088	rrs_a1243g	rrs	n.1243A>G	False
496	rrs_a1244g	AMI	3	1473089	rrs_a1244g	rrs	n.1244A>G	False
497	rrs_a1253g	AMI	3	1473098	rrs_a1253g	rrs	n.1253A>G	False
498	rrs_a1266g	AMI	3	1473111	rrs_a1266g	rrs	n.1266A>G	False
499	rrs_a126c	AMI	3	1471971	rrs_a126c	rrs	n.126A>C	False
500	rrs_a1325c	AMI	3	1473170	rrs_a1325c	rrs	n.1325A>C	False
501	rrs_a1341g	AMI	3	1473186	rrs_a1341g	rrs	n.1341A>G	False
502	rrs_a-140c	AMI	3	1471706	rrs_a-140c	rrs	n.-140A>C	False
503	rrs_a1482g	AMI	3	1473327	rrs_a1482g	rrs	n.1482A>G	False
504	rrs_a1500t	AMI	3	1473345	rrs_a1500t	rrs	n.1500A>T	False
505	rrs_a170g	AMI	3	1472015	rrs_a170g	rrs	n.170A>G	False
506	rrs_a-265g	AMI	3	1471581	rrs_a-265g	rrs	n.-265A>G	False
507	rrs_a273t	AMI	3	1472118	rrs_a273t	rrs	n.273A>T	False
508	rrs_a287g	AMI	3	1472132	rrs_a287g	rrs	n.287A>G	False
509	rrs_a324c	AMI	3	1472169	rrs_a324c	rrs	n.324A>C	False
510	rrs_a32g	AMI	3	1471877	rrs_a32g	rrs	n.32A>G	False
511	rrs_a440g	AMI	3	1472285	rrs_a440g	rrs	n.440A>G	False
512	rrs_a443c	AMI	3	1472288	rrs_a443c	rrs	n.443A>C	False
513	rrs_a447g	AMI	3	1472292	rrs_a447g	rrs	n.447A>G	False
514	rrs_a493g	AMI	3	1472338	rrs_a493g	rrs	n.493A>G	False
515	rrs_a-50g	AMI	3	1471796	rrs_a-50g	rrs	n.-50A>G	False
516	rrs_a613c	AMI	3	1472458	rrs_a613c	rrs	n.613A>C	False
517	rrs_a619g	AMI	3	1472464	rrs_a619g	rrs	n.619A>G	False
518	rrs_a619t	AMI	3	1472464	rrs_a619t	rrs	n.619A>T	False
519	rrs_a633c	AMI	3	1472478	rrs_a633c	rrs	n.633A>C	False
520	rrs_a644t	AMI	3	1472489	rrs_a644t	rrs	n.644A>T	False
521	rrs_a649g	AMI	3	1472494	rrs_a649g	rrs	n.649A>G	False
522	rrs_a736t	AMI	3	1472581	rrs_a736t	rrs	n.736A>T	False
523	rrs_a842g	AMI	3	1472687	rrs_a842g	rrs	n.842A>G	False
524	rrs_a842t	AMI	3	1472687	rrs_a842t	rrs	n.842A>T	False
525	rrs_a869g	AMI	3	1472714	rrs_a869g	rrs	n.869A>G	False
526	rrs_a87g	AMI	3	1471932	rrs_a87g	rrs	n.87A>G	False
527	rrs_a907t	AMI	3	1472752	rrs_a907t	rrs	n.907A>T	False
528	rrs_a91g	AMI	3	1471936	rrs_a91g	rrs	n.91A>G	False
529	rrs_c1001a	AMI	3	1472846	rrs_c1001a	rrs	n.1001C>A	False
530	rrs_c1001g	AMI	3	1472846	rrs_c1001g	rrs	n.1001C>G	False
531	rrs_c1004g	AMI	3	1472849	rrs_c1004g	rrs	n.1004C>G	False
532	rrs_c1015g	AMI	3	1472860	rrs_c1015g	rrs	n.1015C>G	False
533	rrs_c1028a	AMI	3	1472873	rrs_c1028a	rrs	n.1028C>A	False
534	rrs_c1028t	AMI	3	1472873	rrs_c1028t	rrs	n.1028C>T	False
535	rrs_c1062t	AMI	3	1472907	rrs_c1062t	rrs	n.1062C>T	False
536	rrs_c116t	AMI	3	1471961	rrs_c116t	rrs	n.116C>T	False
537	rrs_c1199t	AMI	3	1473044	rrs_c1199t	rrs	n.1199C>T	False
538	rrs_c1210t	AMI	3	1473055	rrs_c1210t	rrs	n.1210C>T	False
539	rrs_c1248g	AMI	3	1473093	rrs_c1248g	rrs	n.1248C>G	False
540	rrs_c1248t	AMI	3	1473093	rrs_c1248t	rrs	n.1248C>T	False
541	rrs_c1257g	AMI	3	1473102	rrs_c1257g	rrs	n.1257C>G	False
542	rrs_c1259g	AMI	3	1473104	rrs_c1259g	rrs	n.1259C>G	False
543	rrs_c1259t	AMI	3	1473104	rrs_c1259t	rrs	n.1259C>T	False
544	rrs_c1283t	AMI	3	1473128	rrs_c1283t	rrs	n.1283C>T	False
545	rrs_c1300t	AMI	3	1473145	rrs_c1300t	rrs	n.1300C>T	False
546	rrs_c1317t	AMI	3	1473162	rrs_c1317t	rrs	n.1317C>T	False
547	rrs_c1328t	AMI	3	1473173	rrs_c1328t	rrs	n.1328C>T	False
548	rrs_c1346t	AMI	3	1473191	rrs_c1346t	rrs	n.1346C>T	False
549	rrs_c1359t	AMI	3	1473204	rrs_c1359t	rrs	n.1359C>T	False
550	rrs_c1414t	AMI	3	1473259	rrs_c1414t	rrs	n.1414C>T	False
551	rrs_c-142t	AMI	3	1471704	rrs_c-142t	rrs	n.-142C>T	False
552	rrs_c1503t	AMI	3	1473348	rrs_c1503t	rrs	n.1503C>T	False
553	rrs_c-193g	AMI	3	1471653	rrs_c-193g	rrs	n.-193C>G	False
554	rrs_c196t	AMI	3	1472041	rrs_c196t	rrs	n.196C>T	False
555	rrs_c-197g	AMI	3	1471649	rrs_c-197g	rrs	n.-197C>G	False
556	rrs_c-212g	AMI	3	1471634	rrs_c-212g	rrs	n.-212C>G	False
557	rrs_c212t	AMI	3	1472057	rrs_c212t	rrs	n.212C>T	False
558	rrs_c-213g	AMI	3	1471633	rrs_c-213g	rrs	n.-213C>G	False
559	rrs_c-213t	AMI	3	1471633	rrs_c-213t	rrs	n.-213C>T	False
560	rrs_c-231a	AMI	3	1471615	rrs_c-231a	rrs	n.-231C>A	False
561	rrs_c247t	AMI	3	1472092	rrs_c247t	rrs	n.247C>T	False
562	rrs_c-257t	AMI	3	1471589	rrs_c-257t	rrs	n.-257C>T	False
563	rrs_c266t	AMI	3	1472111	rrs_c266t	rrs	n.266C>T	False
564	rrs_c-27a	AMI	3	1471819	rrs_c-27a	rrs	n.-27C>A	False
565	rrs_c282t	AMI	3	1472127	rrs_c282t	rrs	n.282C>T	False
566	rrs_c306t	AMI	3	1472151	rrs_c306t	rrs	n.306C>T	False
567	rrs_c307t	AMI	3	1472152	rrs_c307t	rrs	n.307C>T	False
568	rrs_c333t	AMI	3	1472178	rrs_c333t	rrs	n.333C>T	False
569	rrs_c340t	AMI	3	1472185	rrs_c340t	rrs	n.340C>T	False
570	rrs_c344t	AMI	3	1472189	rrs_c344t	rrs	n.344C>T	False
571	rrs_c37t	AMI	3	1471882	rrs_c37t	rrs	n.37C>T	False
572	rrs_c380g	AMI	3	1472225	rrs_c380g	rrs	n.380C>G	False
573	rrs_c385t	AMI	3	1472230	rrs_c385t	rrs	n.385C>T	False
574	rrs_c414t	AMI	3	1472259	rrs_c414t	rrs	n.414C>T	False
575	rrs_c441g	AMI	3	1472286	rrs_c441g	rrs	n.441C>G	False
576	rrs_c441t	AMI	3	1472286	rrs_c441t	rrs	n.441C>T	False
577	rrs_c474t	AMI	3	1472319	rrs_c474t	rrs	n.474C>T	False
578	rrs_c513t	AMI	3	1472358	rrs_c513t	rrs	n.513C>T	False
579	rrs_c606t	AMI	3	1472451	rrs_c606t	rrs	n.606C>T	False
580	rrs_c650t	AMI	3	1472495	rrs_c650t	rrs	n.650C>T	False
581	rrs_c699t	AMI	3	1472544	rrs_c699t	rrs	n.699C>T	False
582	rrs_c-69a	AMI	3	1471777	rrs_c-69a	rrs	n.-69C>A	False
583	rrs_c-69t	AMI	3	1471777	rrs_c-69t	rrs	n.-69C>T	False
584	rrs_c735g	AMI	3	1472580	rrs_c735g	rrs	n.735C>G	False
585	rrs_c735t	AMI	3	1472580	rrs_c735t	rrs	n.735C>T	False
586	rrs_c799t	AMI	3	1472644	rrs_c799t	rrs	n.799C>T	False
587	rrs_c808t	AMI	3	1472653	rrs_c808t	rrs	n.808C>T	False
588	rrs_c-82t	AMI	3	1471764	rrs_c-82t	rrs	n.-82C>T	False
589	rrs_c832a	AMI	3	1472677	rrs_c832a	rrs	n.832C>A	False
590	rrs_c836g	AMI	3	1472681	rrs_c836g	rrs	n.836C>G	False
591	rrs_c84t	AMI	3	1471929	rrs_c84t	rrs	n.84C>T	False
592	rrs_c859t	AMI	3	1472704	rrs_c859t	rrs	n.859C>T	False
593	rrs_c861t	AMI	3	1472706	rrs_c861t	rrs	n.861C>T	False
594	rrs_c905t	AMI	3	1472750	rrs_c905t	rrs	n.905C>T	False
595	rrs_c-91a	AMI	3	1471755	rrs_c-91a	rrs	n.-91C>A	False
596	rrs_c-91t	AMI	3	1471755	rrs_c-91t	rrs	n.-91C>T	False
597	rrs_c-93t	AMI	3	1471753	rrs_c-93t	rrs	n.-93C>T	False
598	rrs_c941t	AMI	3	1472786	rrs_c941t	rrs	n.941C>T	False
599	rrs_c972t	AMI	3	1472817	rrs_c972t	rrs	n.972C>T	False
600	rrs_g1002c	AMI	3	1472847	rrs_g1002c	rrs	n.1002G>C	False
601	rrs_g1013t	AMI	3	1472858	rrs_g1013t	rrs	n.1013G>T	False
602	rrs_g1016a	AMI	3	1472861	rrs_g1016a	rrs	n.1016G>A	False
603	rrs_g1016c	AMI	3	1472861	rrs_g1016c	rrs	n.1016G>C	False
604	rrs_g1035a	AMI	3	1472880	rrs_g1035a	rrs	n.1035G>A	False
605	rrs_g1079a	AMI	3	1472924	rrs_g1079a	rrs	n.1079G>A	False
606	rrs_g1108a	AMI	3	1472953	rrs_g1108a	rrs	n.1108G>A	False
607	rrs_g1144a	AMI	3	1472989	rrs_g1144a	rrs	n.1144G>A	False
608	rrs_g1167a	AMI	3	1473012	rrs_g1167a	rrs	n.1167G>A	False
609	rrs_g1190a	AMI	3	1473035	rrs_g1190a	rrs	n.1190G>A	False
610	rrs_g1234a	AMI	3	1473079	rrs_g1234a	rrs	n.1234G>A	False
611	rrs_g1238t	AMI	3	1473083	rrs_g1238t	rrs	n.1238G>T	False
612	rrs_g1255a	AMI	3	1473100	rrs_g1255a	rrs	n.1255G>A	False
613	rrs_g-125t	AMI	3	1471721	rrs_g-125t	rrs	n.-125G>T	False
614	rrs_g1270t	AMI	3	1473115	rrs_g1270t	rrs	n.1270G>T	False
615	rrs_g1302a	AMI	3	1473147	rrs_g1302a	rrs	n.1302G>A	False
616	rrs_g1321a	AMI	3	1473166	rrs_g1321a	rrs	n.1321G>A	False
617	rrs_g1432a	AMI	3	1473277	rrs_g1432a	rrs	n.1432G>A	False
618	rrs_g1454c	AMI	3	1473299	rrs_g1454c	rrs	n.1454G>C	False
619	rrs_g1497a	AMI	3	1473342	rrs_g1497a	rrs	n.1497G>A	False
620	rrs_g1519a	AMI	3	1473364	rrs_g1519a	rrs	n.1519G>A	False
621	rrs_g-176a	AMI	3	1471670	rrs_g-176a	rrs	n.-176G>A	False
622	rrs_g179t	AMI	3	1472024	rrs_g179t	rrs	n.179G>T	False
623	rrs_g-181a	AMI	3	1471665	rrs_g-181a	rrs	n.-181G>A	False
624	rrs_g-186t	AMI	3	1471660	rrs_g-186t	rrs	n.-186G>T	False
625	rrs_g-191c	AMI	3	1471655	rrs_g-191c	rrs	n.-191G>C	False
626	rrs_g-194t	AMI	3	1471652	rrs_g-194t	rrs	n.-194G>T	False
627	rrs_g-195c	AMI	3	1471651	rrs_g-195c	rrs	n.-195G>C	False
628	rrs_g-199t	AMI	3	1471647	rrs_g-199t	rrs	n.-199G>T	False
629	rrs_g225c	AMI	3	1472070	rrs_g225c	rrs	n.225G>C	False
630	rrs_g-228c	AMI	3	1471618	rrs_g-228c	rrs	n.-228G>C	False
631	rrs_g-235a	AMI	3	1471611	rrs_g-235a	rrs	n.-235G>A	False
632	rrs_g-239a	AMI	3	1471607	rrs_g-239a	rrs	n.-239G>A	False
633	rrs_g24a	AMI	3	1471869	rrs_g24a	rrs	n.24G>A	False
634	rrs_g259a	AMI	3	1472104	rrs_g259a	rrs	n.259G>A	False
635	rrs_g-269a	AMI	3	1471577	rrs_g-269a (murA_419)	rrs	n.-269G>A	False
636	rrs_g-286a	AMI	3	1471560	rrs_g-286a (murA_414)	rrs	n.-286G>A	False
637	rrs_g319a	AMI	3	1472164	rrs_g319a	rrs	n.319G>A	False
638	rrs_g-319a	AMI	3	1471527	rrs_g-319a (murA_403)	rrs	n.-319G>A	False
639	rrs_g349a	AMI	3	1472194	rrs_g349a	rrs	n.349G>A	False
640	rrs_g358a	AMI	3	1472203	rrs_g358a	rrs	n.358G>A	False
641	rrs_g358t	AMI	3	1472203	rrs_g358t	rrs	n.358G>T	False
642	rrs_g406a	AMI	3	1472251	rrs_g406a	rrs	n.406G>A	False
643	rrs_g408a	AMI	3	1472253	rrs_g408a	rrs	n.408G>A	False
644	rrs_g415a	AMI	3	1472260	rrs_g415a	rrs	n.415G>A	False
645	rrs_g424a	AMI	3	1472269	rrs_g424a	rrs	n.424G>A	False
646	rrs_g483c	AMI	3	1472328	rrs_g483c	rrs	n.483G>C	False
647	rrs_g-49a	AMI	3	1471797	rrs_g-49a	rrs	n.-49G>A	False
648	rrs_g-65t	AMI	3	1471781	rrs_g-65t	rrs	n.-65G>T	False
649	rrs_g660t	AMI	3	1472505	rrs_g660t	rrs	n.660G>T	False
650	rrs_g673a	AMI	3	1472518	rrs_g673a	rrs	n.673G>A	False
651	rrs_g-68t	AMI	3	1471778	rrs_g-68t	rrs	n.-68G>T	False
652	rrs_g713a	AMI	3	1472558	rrs_g713a	rrs	n.713G>A	False
653	rrs_g724a	AMI	3	1472569	rrs_g724a	rrs	n.724G>A	False
654	rrs_g752a	AMI	3	1472597	rrs_g752a	rrs	n.752G>A	False
655	rrs_g762a	AMI	3	1472607	rrs_g762a	rrs	n.762G>A	False
656	rrs_g810t	AMI	3	1472655	rrs_g810t	rrs	n.810G>T	False
657	rrs_g840t	AMI	3	1472685	rrs_g840t	rrs	n.840G>T	False
658	rrs_g841t	AMI	3	1472686	rrs_g841t	rrs	n.841G>T	False
659	rrs_g86a	AMI	3	1471931	rrs_g86a	rrs	n.86G>A	False
660	rrs_g887a	AMI	3	1472732	rrs_g887a	rrs	n.887G>A	False
661	rrs_g910a	AMI	3	1472755	rrs_g910a	rrs	n.910G>A	False
662	rrs_g935a	AMI	3	1472780	rrs_g935a	rrs	n.935G>A	False
663	rrs_g9a	AMI	3	1471854	rrs_g9a	rrs	n.9G>A	False
664	rrs_t1005c	AMI	3	1472850	rrs_t1005c	rrs	n.1005T>C	False
665	rrs_t1030g	AMI	3	1472875	rrs_t1030g	rrs	n.1030T>G	False
666	rrs_t1107c	AMI	3	1472952	rrs_t1107c	rrs	n.1107T>C	False
667	rrs_t1191c	AMI	3	1473036	rrs_t1191c	rrs	n.1191T>C	False
668	rrs_t1208c	AMI	3	1473053	rrs_t1208c	rrs	n.1208T>C	False
669	rrs_t1208g	AMI	3	1473053	rrs_t1208g	rrs	n.1208T>G	False
670	rrs_t1239c	AMI	3	1473084	rrs_t1239c	rrs	n.1239T>C	False
671	rrs_t1264c	AMI	3	1473109	rrs_t1264c	rrs	n.1264T>C	False
672	rrs_t1265g	AMI	3	1473110	rrs_t1265g	rrs	n.1265T>G	False
673	rrs_t1276c	AMI	3	1473121	rrs_t1276c	rrs	n.1276T>C	False
674	rrs_t1276g	AMI	3	1473121	rrs_t1276g	rrs	n.1276T>G	False
675	rrs_t1289c	AMI	3	1473134	rrs_t1289c	rrs	n.1289T>C	False
676	rrs_t1327g	AMI	3	1473172	rrs_t1327g	rrs	n.1327T>G	False
677	rrs_t140c	AMI	3	1471985	rrs_t140c	rrs	n.140T>C	False
678	rrs_t140g	AMI	3	1471985	rrs_t140g	rrs	n.140T>G	False
679	rrs_t1537g	AMI	3	1473382	rrs_t1537g	rrs	n.1537T>G	False
680	rrs_t169c	AMI	3	1472014	rrs_t169c	rrs	n.169T>C	False
681	rrs_t16g	AMI	3	1471861	rrs_t16g	rrs	n.16T>G	False
682	rrs_t203c	AMI	3	1472048	rrs_t203c	rrs	n.203T>C	False
683	rrs_t213a	AMI	3	1472058	rrs_t213a	rrs	n.213T>A	False
684	rrs_t-244c	AMI	3	1471602	rrs_t-244c	rrs	n.-244T>C	False
685	rrs_t-246c	AMI	3	1471600	rrs_t-246c	rrs	n.-246T>C	False
686	rrs_t-248c	AMI	3	1471598	rrs_t-248c	rrs	n.-248T>C	False
687	rrs_t305a	AMI	3	1472150	rrs_t305a	rrs	n.305T>A	False
688	rrs_t305c	AMI	3	1472150	rrs_t305c	rrs	n.305T>C	False
689	rrs_t-306c	AMI	3	1471540	rrs_t-306c (murA_407)	rrs	n.-306T>C	False
690	rrs_t-324a	AMI	3	1471522	rrs_t-324a (murA_401)	rrs	n.-324T>A	False
691	rrs_t-325a	AMI	3	1471521	rrs_t-325a (murA_401)	rrs	n.-325T>A	False
692	rrs_t327c	AMI	3	1472172	rrs_t327c	rrs	n.327T>C	False
693	rrs_t454c	AMI	3	1472299	rrs_t454c	rrs	n.454T>C	False
694	rrs_t481g	AMI	3	1472326	rrs_t481g	rrs	n.481T>G	False
695	rrs_t529c	AMI	3	1472374	rrs_t529c	rrs	n.529T>C	False
696	rrs_t590c	AMI	3	1472435	rrs_t590c	rrs	n.590T>C	False
697	rrs_t593c	AMI	3	1472438	rrs_t593c	rrs	n.593T>C	False
698	rrs_t603c	AMI	3	1472448	rrs_t603c	rrs	n.603T>C	False
699	rrs_t663c	AMI	3	1472508	rrs_t663c	rrs	n.663T>C	False
700	rrs_t-67c	AMI	3	1471779	rrs_t-67c	rrs	n.-67T>C	False
701	rrs_t698c	AMI	3	1472543	rrs_t698c	rrs	n.698T>C	False
702	rrs_t727c	AMI	3	1472572	rrs_t727c	rrs	n.727T>C	False
703	rrs_t-78c	AMI	3	1471768	rrs_t-78c	rrs	n.-78T>C	False
704	rrs_t-79c	AMI	3	1471767	rrs_t-79c	rrs	n.-79T>C	False
705	rrs_t80c	AMI	3	1471925	rrs_t80c	rrs	n.80T>C	False
706	rrs_t815c	AMI	3	1472660	rrs_t815c	rrs	n.815T>C	False
707	rrs_t828g	AMI	3	1472673	rrs_t828g	rrs	n.828T>G	False
708	rrs_t829g	AMI	3	1472674	rrs_t829g	rrs	n.829T>G	False
709	rrs_t830a	AMI	3	1472675	rrs_t830a	rrs	n.830T>A	False
710	rrs_t837a	AMI	3	1472682	rrs_t837a	rrs	n.837T>A	False
711	rrs_t837g	AMI	3	1472682	rrs_t837g	rrs	n.837T>G	False
712	rrs_t838c	AMI	3	1472683	rrs_t838c	rrs	n.838T>C	False
713	rrs_t93g	AMI	3	1471938	rrs_t93g	rrs	n.93T>G	False
714	rrs_t945c	AMI	3	1472790	rrs_t945c	rrs	n.945T>C	False
715	whiB6_105_del_183_cgtgcaaacgccgagcgggacctcatacagggcggttactgtcatgtcta_c	AMI	3	4338417	whiB6_105_del_183_cgtgcaaacgccgagcgggacctcatacagggcggttactgtcatgtcta_c	whiB6	c.-78_104del	False
716	whiB6_-114_ins_1_t_ta	AMI	3	4338635	whiB6_-114_ins_1_t_ta	whiB6	c.-115_-114insT	False
717	whiB6_132_del_3_agtc_a	AMI	3	4338390	whiB6_132_del_3_agtc_a	whiB6	c.129_131del	False
718	whiB6_132_ins_1_agtc_agtct	AMI	3	4338390	whiB6_132_ins_1_agtc_agtct	whiB6	c.128_129insA	False
719	whiB6_136_del_1_cg_c	AMI	3	4338386	whiB6_136_del_1_cg_c	whiB6	c.135del	False
720	whiB6_-138_del_1_tcgccggcgcgtatccgaccccttcgggcagatcttccaggaaaagtgtt_tcgccggcgcgtatccgaccccttcgggcagatcttccaggaaagtgtt	AMI	3	4338659	whiB6_-138_del_1_tcgccggcgcgtatccgaccccttcgggcagatcttccaggaaaagtgtt_tcgccggcgcgtatccgaccccttcgggcagatcttccaggaaagtgtt	whiB6	c.-179del|c.-180del|c.-181del|c.-182del	False
721	whiB6_152_del_9_gtcttggcct_g	AMI	3	4338370	whiB6_152_del_9_gtcttggcct_g	whiB6	c.143_151del	False
722	whiB6_152_ins_1_gtcttggcct_gtctttggcct	AMI	3	4338370	whiB6_152_ins_1_gtcttggcct_gtctttggcct	whiB6	c.149_150insA|c.148_149insA|c.147_148insA	False
723	whiB6_152_ins_13_gtcttggcct_gtcttggcctcgtcgtcgggagt	AMI	3	4338370	whiB6_152_ins_13_gtcttggcct_gtcttggcctcgtcgtcgggagt	whiB6	c.143_144insCTCCCGACGACGA|c.142_143insACTCCCGACGACG	False
724	whiB6_156_del_1_cag_cg	AMI	3	4338366	whiB6_156_del_1_cag_cg	whiB6	c.155del	False
725	whiB6_156_ins_1_cag_caag	AMI	3	4338366	whiB6_156_ins_1_cag_caag	whiB6	c.155_156insT|c.154_155insT	False
726	whiB6_156_ins_8_cag_cagggtcttgg	AMI	3	4338366	whiB6_156_ins_8_cag_cagggtcttgg	whiB6	c.154_155insCAAGACCC|c.153_154insCCAAGACC	False
727	whiB6_158_del_1_ca_c	AMI	3	4338364	whiB6_158_del_1_ca_c	whiB6	c.157del	False
728	whiB6_167_del_1_ca_c	AMI	3	4338355	whiB6_167_del_1_ca_c	whiB6	c.166del	False
729	whiB6_171_del_1_cg_c	AMI	3	4338351	whiB6_171_del_1_cg_c	whiB6	c.170del	False
730	whiB6_177_del_1_ccg_cc	AMI	3	4338345	whiB6_177_del_1_ccg_cc	whiB6	c.175del	False
731	whiB6_184_del_4_acagc_a	AMI	3	4338338	whiB6_184_del_4_acagc_a	whiB6	c.180_183del	False
732	whiB6_184_ins_4_acagc_acagccacc	AMI	3	4338338	whiB6_184_ins_4_acagc_acagccacc	whiB6	c.180_181insGTGG|c.179_180insGGTG	False
733	whiB6_186_ins_1_a_ac	AMI	3	4338336	whiB6_186_ins_1_a_ac	whiB6	c.185_186insG	False
734	whiB6_188_ins_2_g_gca	AMI	3	4338334	whiB6_188_ins_2_g_gca	whiB6	c.187_188insTG	False
735	whiB6_189_ins_2_t_tgc	AMI	3	4338333	whiB6_189_ins_2_t_tgc	whiB6	c.188_189insGC	False
736	whiB6_195_del_2_gtc_g	AMI	3	4338327	whiB6_195_del_2_gtc_g	whiB6	c.193_194del	False
737	whiB6_199_del_1_cg_c	AMI	3	4338323	whiB6_199_del_1_cg_c	whiB6	c.198del	False
738	whiB6_218_ins_1_t_tc	AMI	3	4338304	whiB6_218_ins_1_t_tc	whiB6	c.217_218insG	False
739	whiB6_223_del_1_gc_g	AMI	3	4338299	whiB6_223_del_1_gc_g	whiB6	c.222del	False
740	whiB6_223_ins_1_gc_gca	AMI	3	4338299	whiB6_223_ins_1_gc_gca	whiB6	c.221_222insT	False
741	whiB6_223_ins_2_gc_gccc	AMI	3	4338299	whiB6_223_ins_2_gc_gccc	whiB6	c.222_223insGG|c.221_222insGG	False
742	whiB6_232_del_1_ct_c	AMI	3	4338290	whiB6_232_del_1_ct_c	whiB6	c.231del	False
743	whiB6_236_ins_1_ac_acc	AMI	3	4338286	whiB6_236_ins_1_ac_acc	whiB6	c.235_236insG|c.234_235insG	False
744	whiB6_24_del_1_ct_c	AMI	3	4338498	whiB6_24_del_1_ct_c	whiB6	c.23del	False
745	whiB6_255_del_1_gcctg_gccg	AMI	3	4338267	whiB6_255_del_1_gcctg_gccg	whiB6	c.252del	False
746	whiB6_255_del_2_gcctg_gcc	AMI	3	4338267	whiB6_255_del_2_gcctg_gcc	whiB6	c.251_252del	False
747	whiB6_255_ins_1_gcctg_gccctg	AMI	3	4338267	whiB6_255_ins_1_gcctg_gccctg	whiB6	c.254_255insG|c.253_254insG|c.252_253insG	False
748	whiB6_274_ins_4_a_acgcg	AMI	3	4338248	whiB6_274_ins_4_a_acgcg	whiB6	c.273_274insCGCG	False
749	whiB6_298_del_1_cg_c	AMI	3	4338224	whiB6_298_del_1_cg_c	whiB6	c.297del	False
750	whiB6_307_del_14_cgttgcgctcggcca_c	AMI	3	4338215	whiB6_307_del_14_cgttgcgctcggcca_c	whiB6	c.293_306del	False
751	whiB6_307_ins_1_cgttgcgctcggcca_cgttgccgctcggcca	AMI	3	4338215	whiB6_307_ins_1_cgttgcgctcggcca_cgttgccgctcggcca	whiB6	c.302_303insG|c.301_302insG	False
752	whiB6_307_ins_5_cgttgcgctcggcca_cgttgcgctcggccagggat	AMI	3	4338215	whiB6_307_ins_5_cgttgcgctcggcca_cgttgcgctcggccagggat	whiB6	c.292_293insATCCC	False
753	whiB6_315_del_2_cgg_c	AMI	3	4338207	whiB6_315_del_2_cgg_c	whiB6	c.313_314del	False
754	whiB6_315_ins_1_c_cg	AMI	3	4338207	whiB6_315_ins_1_c_cg	whiB6	c.314_315insC	False
755	whiB6_321_del_1_gcgc_gcc	AMI	3	4338201	whiB6_321_del_1_gcgc_gcc	whiB6	c.319del	False
756	whiB6_325_del_1_ggt_gg	AMI	3	4338197	whiB6_325_del_1_ggt_gg	whiB6	c.323del	False
757	whiB6_326_del_1_tg_t	AMI	3	4338196	whiB6_326_del_1_tg_t	whiB6	c.325del	False
758	whiB6_335_ins_2_g_gac	AMI	3	4338187	whiB6_335_ins_2_g_gac	whiB6	c.334_335insGT	False
759	whiB6_341_del_1_tg_t	AMI	3	4338181	whiB6_341_del_1_tg_t	whiB6	c.340del	False
760	whiB6_343_ins_1_a_at	AMI	3	4338179	whiB6_343_ins_1_a_at	whiB6	c.342_343insA	False
761	whiB6_4_del_1_gc_g	AMI	3	4338518	whiB6_4_del_1_gc_g	whiB6	c.3del	False
762	whiB6_-41_del_1_gcggtgctgcggctccggttcggcgagctccgagc_gaggtgctgcggctccggttcggcgagctccggg	AMI	3	4338562	whiB6_-41_del_1_gcggtgctgcggctccggttcggcgagctccgagc_gaggtgctgcggctccggttcggcgagctccggg			True
763	whiB6_-5_ins_42_c_cgacgggtcggcccaggctgtcggggcgggaagcgcattaacc	AMI	3	4338526	whiB6_-5_ins_42_c_cgacgggtcggcccaggctgtcggggcgggaagcgcattaacc	whiB6	c.-6_-5insGGTTAATGCGCTTCCCGCCCCGACAGCCTGGGCCGACCCGTC	False
764	whiB6_-65_del_142_gagctccgagctctagtgcgcgcaccgccgagtaccagggcatagatcct_gtgta	AMI	3	4338586	whiB6_-65_del_142_gagctccgagctctagtgcgcgcaccgccgagtaccagggcatagatcct_gtgta			True
765	whiB6_-66_del_1_agctccgagctctagt_agatccgagtctagt	AMI	3	4338587	whiB6_-66_del_1_agctccgagctctagt_agatccgagtctagt			True
766	whiB6_-66_del_1_agctccgagctctagt_agcaccgagtctagt	AMI	3	4338587	whiB6_-66_del_1_agctccgagctctagt_agcaccgagtctagt			True
767	whiB6_-66_del_1_agctccgagctctagt_agccccgagtctagt	AMI	3	4338587	whiB6_-66_del_1_agctccgagctctagt_agccccgagtctagt			True
768	whiB6_-66_del_1_agctccgagctctagt_agctcagagtctagt	AMI	3	4338587	whiB6_-66_del_1_agctccgagctctagt_agctcagagtctagt			True
769	whiB6_-72_del_1_gagct_gcgt	AMI	3	4338593	whiB6_-72_del_1_gagct_gcgt			True
770	whiB6_-72_del_1_gagct_gggt	AMI	3	4338593	whiB6_-72_del_1_gagct_gggt			True
771	whiB6_-72_del_1_gagctctagtg_gagtctagta	AMI	3	4338593	whiB6_-72_del_1_gagctctagtg_gagtctagta			True
772	whiB6_-73_del_1_ag_a	AMI	3	4338594	whiB6_-73_del_1_ag_a	whiB6	c.-74del	False
773	whiB6_-73_del_1_agctc_agtc	AMI	3	4338594	whiB6_-73_del_1_agctc_agtc	whiB6	c.-75del	False
774	whiB6_-73_del_20_agctctagtgcgcgcaccgccgagtaccagggcatagatcctgttaatca_agtctagtgcgcgcaccgccgagtaccagggctgtgtatctggcctcgcc	AMI	3	4338594	whiB6_-73_del_20_agctctagtgcgcgcaccgccgagtaccagggcatagatcctgttaatca_agtctagtgcgcgcaccgccgagtaccagggctgtgtatctggcctcgcc			True
775	whiB6_-74_del_1_gctc_gtt	AMI	3	4338595	whiB6_-74_del_1_gctc_gtt			True
776	whiB6_-74_del_1_gctct_gtcc	AMI	3	4338595	whiB6_-74_del_1_gctct_gtcc			True
777	whiB6_-74_del_1_gctctagt_gtctagt	AMI	3	4338595	whiB6_-74_del_1_gctctagt_gtctagt	whiB6	c.-75del	False
778	whiB6_-74_del_1_gctctagt_gtctcga	AMI	3	4338595	whiB6_-74_del_1_gctctagt_gtctcga			True
779	whiB6_-74_del_1_gctctagtg_gtttagta	AMI	3	4338595	whiB6_-74_del_1_gctctagtg_gtttagta			True
780	whiB6_-74_del_1_gctctagtgcgcgcaccgcc_gtctagtgcgcgcaccgcg	AMI	3	4338595	whiB6_-74_del_1_gctctagtgcgcgcaccgcc_gtctagtgcgcgcaccgcg			True
781	whiB6_-74_del_1_gctctagtgcgcgcaccgccg_gtctagtgcgcgcaccgcca	AMI	3	4338595	whiB6_-74_del_1_gctctagtgcgcgcaccgccg_gtctagtgcgcgcaccgcca			True
782	whiB6_-74_del_1_gctctagtgcgcgcaccgccgagtaccaggg_gtctagtgcgcgcaccgccgagtaccagga	AMI	3	4338595	whiB6_-74_del_1_gctctagtgcgcgcaccgccgagtaccaggg_gtctagtgcgcgcaccgccgagtaccagga			True
783	whiB6_-74_del_7_gctctagtgcg_gtct	AMI	3	4338595	whiB6_-74_del_7_gctctagtgcg_gtct			True
784	whiB6_-75_del_1_ctctagtg_cctagta	AMI	3	4338596	whiB6_-75_del_1_ctctagtg_cctagta			True
785	whiB6_77_del_1_agggcggt_agggcgg	AMI	3	4338445	whiB6_77_del_1_agggcggt_agggcgg	whiB6	c.70del	False
786	whiB6_8_del_316_tatcgcattaaccatagcgatgcaacagtttcctcctctgcctgcctagc_tt	AMI	3	4338514	whiB6_8_del_316_tatcgcattaaccatagcgatgcaacagtttcctcctctgcctgcctagc_tt			True
787	whiB6_84_del_1_ct_c	AMI	3	4338438	whiB6_84_del_1_ct_c	whiB6	c.83del	False
788	whiB6_-87_del_1_ca_c	AMI	3	4338608	whiB6_-87_del_1_ca_c	whiB6	c.-88del	False
789	whiB6_88_del_83_ggacctcatacagggcggttactgtcatgtctacgttcctccagaaagcg_g	AMI	3	4338434	whiB6_88_del_83_ggacctcatacagggcggttactgtcatgtctacgttcctccagaaagcg_g	whiB6	c.5_87del	False
790	whiB6_-94_del_3_gagt_g	AMI	3	4338615	whiB6_-94_del_3_gagt_g	whiB6	c.-97_-95del	False
791	whiB6_-98_ins_4_a_accag	AMI	3	4338619	whiB6_-98_ins_4_a_accag	whiB6	c.-99_-98insCTGG	False
792	whiB6_a-114t	AMI	3	4338635	whiB6_a-114t	whiB6	c.-114A>T	False
793	whiB6_a-116g	AMI	3	4338637	whiB6_a-116g	whiB6	c.-116A>G	False
794	whiB6_a-125c	AMI	3	4338646	whiB6_a-125c	whiB6	c.-125A>C	False
795	whiB6_a-13g	AMI	3	4338534	whiB6_a-13g	whiB6	c.-13A>G	False
796	whiB6_a-172g	AMI	3	4338693	whiB6_a-172g	whiB6	c.-172A>G	False
797	whiB6_a-184g	AMI	3	4338705	whiB6_a-184g	whiB6	c.-184A>G	False
798	whiB6_a-189g	AMI	3	4338710	whiB6_a-189g	whiB6	c.-189A>G	False
799	whiB6_a-21g	AMI	3	4338542	whiB6_a-21g	whiB6	c.-21A>G	False
800	whiB6_A25S	AMI	3	nan	whiB6_A25S	whiB6	p.Ala25Ser	False
801	whiB6_A25T	AMI	3	nan	whiB6_A25T	whiB6	p.Ala25Thr	False
802	whiB6_a-31g	AMI	3	4338552	whiB6_a-31g	whiB6	c.-31A>G	False
803	whiB6_a-45g	AMI	3	4338566	whiB6_a-45g	whiB6	c.-45A>G	False
804	whiB6_A49D	AMI	3	nan	whiB6_A49D	whiB6	p.Ala49Asp	False
805	whiB6_A49V	AMI	3	nan	whiB6_A49V	whiB6	p.Ala49Val	False
806	whiB6_A55P	AMI	3	nan	whiB6_A55P	whiB6	p.Ala55Pro	False
807	whiB6_a-59c	AMI	3	4338580	whiB6_a-59c	whiB6	c.-59A>C	False
808	whiB6_A6S	AMI	3	nan	whiB6_A6S	whiB6	p.Ala6Ser	False
809	whiB6_A6V	AMI	3	nan	whiB6_A6V	whiB6	p.Ala6Val	False
810	whiB6_A72V	AMI	3	nan	whiB6_A72V	whiB6	p.Ala72Val	False
811	whiB6_A77T	AMI	3	nan	whiB6_A77T	whiB6	p.Ala77Thr	False
812	whiB6_a-78c	AMI	3	4338599	whiB6_a-78c	whiB6	c.-78A>C	False
813	whiB6_A7S	AMI	3	nan	whiB6_A7S	whiB6	p.Ala7Ser	False
814	whiB6_A89E	AMI	3	nan	whiB6_A89E	whiB6	p.Ala89Glu	False
815	whiB6_A91E	AMI	3	nan	whiB6_A91E	whiB6	p.Ala91Glu	False
816	whiB6_A91G	AMI	3	nan	whiB6_A91G	whiB6	p.Ala91Gly	False
817	whiB6_A91T	AMI	3	nan	whiB6_A91T	whiB6	p.Ala91Thr	False
818	whiB6_A91V	AMI	3	nan	whiB6_A91V	whiB6	p.Ala91Val	False
819	whiB6_a-97c	AMI	3	4338618	whiB6_a-97c	whiB6	c.-97A>C	False
820	whiB6_A99P	AMI	3	nan	whiB6_A99P	whiB6	p.Ala99Pro	False
821	whiB6_A99V	AMI	3	nan	whiB6_A99V	whiB6	p.Ala99Val	False
822	whiB6_A9S	AMI	3	nan	whiB6_A9S	whiB6	p.Ala9Ser	False
823	whiB6_c-11g	AMI	3	4338532	whiB6_c-11g	whiB6	c.-11C>G	False
824	whiB6_c-126t	AMI	3	4338647	whiB6_c-126t	whiB6	c.-126C>T	False
825	whiB6_c-128g	AMI	3	4338649	whiB6_c-128g	whiB6	c.-128C>G	False
826	whiB6_c-128t	AMI	3	4338649	whiB6_c-128t	whiB6	c.-128C>T	False
827	whiB6_c-135a	AMI	3	4338656	whiB6_c-135a	whiB6	c.-135C>A	False
828	whiB6_c-140t	AMI	3	4338661	whiB6_c-140t	whiB6	c.-140C>T	False
829	whiB6_c-143t	AMI	3	4338664	whiB6_c-143t	whiB6	c.-143C>T	False
830	whiB6_c-146t	AMI	3	4338667	whiB6_c-146t	whiB6	c.-146C>T	False
831	whiB6_c-168t	AMI	3	4338689	whiB6_c-168t	whiB6	c.-168C>T	False
832	whiB6_c-185g	AMI	3	4338706	whiB6_c-185g	whiB6	c.-185C>G	False
833	whiB6_C34R	AMI	3	nan	whiB6_C34R	whiB6	p.Cys34Arg	False
834	whiB6_c-44t	AMI	3	4338565	whiB6_c-44t	whiB6	c.-44C>T	False
835	whiB6_C53Y	AMI	3	nan	whiB6_C53Y	whiB6	p.Cys53Tyr	False
836	whiB6_C56Y	AMI	3	nan	whiB6_C56Y	whiB6	p.Cys56Tyr	False
837	whiB6_C62R	AMI	3	nan	whiB6_C62R	whiB6	p.Cys62Arg	False
838	whiB6_C62Y	AMI	3	nan	whiB6_C62Y	whiB6	p.Cys62Tyr	False
839	whiB6_c-84t	AMI	3	4338605	whiB6_c-84t	whiB6	c.-84C>T	False
840	whiB6_c-96g	AMI	3	4338617	whiB6_c-96g	whiB6	c.-96C>G	False
841	whiB6_c-9a	AMI	3	4338530	whiB6_c-9a	whiB6	c.-9C>A	False
842	whiB6_D20A	AMI	3	nan	whiB6_D20A	whiB6	p.Asp20Ala	False
843	whiB6_D37H	AMI	3	nan	whiB6_D37H	whiB6	p.Asp37His	False
844	whiB6_D65G	AMI	3	nan	whiB6_D65G	whiB6	p.Asp65Gly	False
845	whiB6_E100!	AMI	3	nan	whiB6_E100!	whiB6	p.Glu100*	False
846	whiB6_E73!	AMI	3	nan	whiB6_E73!	whiB6	p.Glu73*	False
847	whiB6_E73D	AMI	3	nan	whiB6_E73D	whiB6	p.Glu73Asp	False
848	whiB6_E8A	AMI	3	nan	whiB6_E8A	whiB6	p.Glu8Ala	False
849	whiB6_E8G	AMI	3	nan	whiB6_E8G	whiB6	p.Glu8Gly	False
850	whiB6_E8V	AMI	3	nan	whiB6_E8V	whiB6	p.Glu8Val	False
851	whiB6_F5C	AMI	3	nan	whiB6_F5C	whiB6	p.Phe5Cys	False
852	whiB6_F90C	AMI	3	nan	whiB6_F90C	whiB6	p.Phe90Cys	False
853	whiB6_F90V	AMI	3	nan	whiB6_F90V	whiB6	p.Phe90Val	False
854	whiB6_g-10a	AMI	3	4338531	whiB6_g-10a	whiB6	c.-10G>A	False
855	whiB6_g-113c	AMI	3	4338634	whiB6_g-113c	whiB6	c.-113G>C	False
856	whiB6_g-159c	AMI	3	4338680	whiB6_g-159c	whiB6	c.-159G>C	False
857	whiB6_g-24c	AMI	3	4338545	whiB6_g-24c	whiB6	c.-24G>C	False
858	whiB6_g-24t	AMI	3	4338545	whiB6_g-24t	whiB6	c.-24G>T	False
859	whiB6_g-25a	AMI	3	4338546	whiB6_g-25a	whiB6	c.-25G>A	False
860	whiB6_G32S	AMI	3	nan	whiB6_G32S	whiB6	p.Gly32Ser	False
861	whiB6_g-33c	AMI	3	4338554	whiB6_g-33c	whiB6	c.-33G>C	False
862	whiB6_g-5a	AMI	3	4338526	whiB6_g-5a	whiB6	c.-5G>A	False
863	whiB6_G74E	AMI	3	nan	whiB6_G74E	whiB6	p.Gly74Glu	False
864	whiB6_G74R	AMI	3	nan	whiB6_G74R	whiB6	p.Gly74Arg	False
865	whiB6_G85A	AMI	3	nan	whiB6_G85A	whiB6	p.Gly85Ala	False
866	whiB6_G85V	AMI	3	nan	whiB6_G85V	whiB6	p.Gly85Val	False
867	whiB6_G93D	AMI	3	nan	whiB6_G93D	whiB6	p.Gly93Asp	False
868	whiB6_g-99t	AMI	3	4338620	whiB6_g-99t	whiB6	c.-99G>T	False
869	whiB6_H109Y	AMI	3	nan	whiB6_H109Y	whiB6	p.His109Tyr	False
870	whiB6_K50!	AMI	3	nan	whiB6_K50!	whiB6	p.Lys50*	False
871	whiB6_K50E	AMI	3	nan	whiB6_K50E	whiB6	p.Lys50Glu	False
872	whiB6_K50Q	AMI	3	nan	whiB6_K50Q	whiB6	p.Lys50Gln	False
873	whiB6_L52P	AMI	3	nan	whiB6_L52P	whiB6	p.Leu52Pro	False
874	whiB6_L95A	AMI	3	nan	whiB6_L95A	whiB6	p.Leu95Ala	False
875	whiB6_L95R	AMI	3	nan	whiB6_L95R	whiB6	p.Leu95Arg	False
876	whiB6_L98R	AMI	3	nan	whiB6_L98R	whiB6	p.Leu98Arg	False
877	whiB6_M21I	AMI	3	nan	whiB6_M21I	whiB6	p.Met21Ile	False
878	whiB6_N13S	AMI	3	nan	whiB6_N13S	whiB6	p.Asn13Ser	False
879	whiB6_N18T	AMI	3	nan	whiB6_N18T	whiB6	p.Asn18Thr	False
880	whiB6_P82S	AMI	3	nan	whiB6_P82S	whiB6	p.Pro82Ser	False
881	whiB6_Q36!	AMI	3	nan	whiB6_Q36!	whiB6	p.Gln36*	False
882	whiB6_R101P	AMI	3	nan	whiB6_R101P	whiB6	p.Arg101Pro	False
883	whiB6_R17K	AMI	3	nan	whiB6_R17K	whiB6	p.Arg17Lys	False
884	whiB6_R58G	AMI	3	nan	whiB6_R58G	whiB6	p.Arg58Gly	False
885	whiB6_R59L	AMI	3	nan	whiB6_R59L	whiB6	p.Arg59Leu	False
886	whiB6_R64C	AMI	3	nan	whiB6_R64C	whiB6	p.Arg64Cys	False
887	whiB6_R86L	AMI	3	nan	whiB6_R86L	whiB6	p.Arg86Leu	False
888	whiB6_R86P	AMI	3	nan	whiB6_R86P	whiB6	p.Arg86Pro	False
889	whiB6_R88G	AMI	3	nan	whiB6_R88G	whiB6	p.Arg88Gly	False
890	whiB6_R96P	AMI	3	nan	whiB6_R96P	whiB6	p.Arg96Pro	False
891	whiB6_S112F	AMI	3	nan	whiB6_S112F	whiB6	p.Ser112Phe	False
892	whiB6_S84L	AMI	3	nan	whiB6_S84L	whiB6	p.Ser84Leu	False
893	whiB6_T10A	AMI	3	nan	whiB6_T10A	whiB6	p.Thr10Ala	False
894	whiB6_t-110g	AMI	3	4338631	whiB6_t-110g	whiB6	c.-110T>G	False
895	whiB6_t-119g	AMI	3	4338640	whiB6_t-119g	whiB6	c.-119T>G	False
896	whiB6_T11A	AMI	3	nan	whiB6_T11A	whiB6	p.Thr11Ala	False
897	whiB6_T11P	AMI	3	nan	whiB6_T11P	whiB6	p.Thr11Pro	False
898	whiB6_t-176g	AMI	3	4338697	whiB6_t-176g	whiB6	c.-176T>G	False
899	whiB6_t-17c	AMI	3	4338538	whiB6_t-17c	whiB6	c.-17T>C	False
900	whiB6_t-182g	AMI	3	4338703	whiB6_t-182g	whiB6	c.-182T>G	False
901	whiB6_t-191c	AMI	3	4338712	whiB6_t-191c	whiB6	c.-191T>C	False
902	whiB6_T24A	AMI	3	nan	whiB6_T24A	whiB6	p.Thr24Ala	False
903	whiB6_T35M	AMI	3	nan	whiB6_T35M	whiB6	p.Thr35Met	False
904	whiB6_T35P	AMI	3	nan	whiB6_T35P	whiB6	p.Thr35Pro	False
905	whiB6_T42A	AMI	3	nan	whiB6_T42A	whiB6	p.Thr42Ala	False
906	whiB6_t-6c	AMI	3	4338527	whiB6_t-6c	whiB6	c.-6T>C	False
907	whiB6_t-88g	AMI	3	4338609	whiB6_t-88g	whiB6	c.-88T>G	False
908	whiB6_V23A	AMI	3	nan	whiB6_V23A	whiB6	p.Val23Ala	False
909	whiB6_V33G	AMI	3	nan	whiB6_V33G	whiB6	p.Val33Gly	False
910	whiB6_W16!	AMI	3	nan	whiB6_W16!	whiB6	p.Trp16*	False
911	whiB6_W16R	AMI	3	nan	whiB6_W16R	whiB6	p.Trp16Arg	False
912	whiB6_W41S	AMI	3	nan	whiB6_W41S	whiB6	p.Trp41Ser	False
913	whiB6_W76C	AMI	3	nan	whiB6_W76C	whiB6	p.Trp76Cys	False
914	whiB6_W76R	AMI	3	nan	whiB6_W76R	whiB6	p.Trp76Arg	False
915	whiB6_W76S	AMI	3	nan	whiB6_W76S	whiB6	p.Trp76Ser	False
916	whiB7_-1_del_176_gtcctgtttcacctgcttcctggtctggtggcggttcttcgaaagtgatc_ga	AMI	3	3568680	whiB7_-1_del_176_gtcctgtttcacctgcttcctggtctggtggcggttcttcgaaagtgatc_ga			True
917	whiB7_193_del_1_cgc_cg	AMI	3	3568487	whiB7_193_del_1_cgc_cg	whiB7	c.191del	False
918	whiB7_-202_ins_1_c_cg	AMI	3	3568881	whiB7_-202_ins_1_c_cg	whiB7	c.-203_-202insC	False
919	whiB7_-210_ins_1_g_gc	AMI	3	3568889	whiB7_-210_ins_1_g_gc	whiB7	c.-211_-210insG	False
920	whiB7_-213_del_1_atggggggttc_atggggggtc	AMI	3	3568892	whiB7_-213_del_1_atggggggttc_atggggggtc	whiB7	c.-221del|c.-222del	False
921	whiB7_264_del_12_cttgcgcggacgtcc_ctt	AMI	3	3568416	whiB7_264_del_12_cttgcgcggacgtcc_ctt	whiB7	c.250_261del	False
922	whiB7_-316_del_2_gcc_g	AMI	3	3568995	whiB7_-316_del_2_gcc_g	whiB7	c.-318_-317del	False
923	whiB7_-339_del_1_tg_t	AMI	3	3569018	whiB7_-339_del_1_tg_t	whiB7	c.-340del	False
924	whiB7_41_del_12_ctttgtctgggggtctgt_ctttgt	AMI	3	3568639	whiB7_41_del_12_ctttgtctgggggtctgt_ctttgt	whiB7	c.27_38del|c.26_37del|c.25_36del|c.24_35del	False
925	whiB7_41_ins_1_ctttgtctgggggtctgt_ctttgtctggggggtctgt	AMI	3	3568639	whiB7_41_ins_1_ctttgtctgggggtctgt_ctttgtctggggggtctgt	whiB7	c.33_34insC|c.32_33insC|c.31_32insC|c.30_31insC|c.29_30insC|c.28_29insC	False
926	whiB7_a-128g	AMI	3	3568807	whiB7_a-128g	whiB7	c.-128A>G	False
927	whiB7_a-212c	AMI	3	3568891	whiB7_a-212c	whiB7	c.-212A>C	False
928	whiB7_a-214c	AMI	3	3568893	whiB7_a-214c	whiB7	c.-214A>C	False
929	whiB7_a-221c	AMI	3	3568900	whiB7_a-221c	whiB7	c.-221A>C	False
930	whiB7_a-295c	AMI	3	3568974	whiB7_a-295c	whiB7	c.-295A>C	False
931	whiB7_a-396g	AMI	3	3569075	whiB7_a-396g	whiB7	c.-396A>G	False
932	whiB7_A39T	AMI	3	nan	whiB7_A39T	whiB7	p.Ala39Thr	False
933	whiB7_a-49g	AMI	3	3568728	whiB7_a-49g	whiB7	c.-49A>G	False
934	whiB7_A55E	AMI	3	nan	whiB7_A55E	whiB7	p.Ala55Glu	False
935	whiB7_a-65g	AMI	3	3568744	whiB7_a-65g	whiB7	c.-65A>G	False
936	whiB7_a-78g	AMI	3	3568757	whiB7_a-78g	whiB7	c.-78A>G	False
937	whiB7_a-7g	AMI	3	3568686	whiB7_a-7g	whiB7	c.-7A>G	False
938	whiB7_a-8t	AMI	3	3568687	whiB7_a-8t	whiB7	c.-8A>T	False
939	whiB7_A90S	AMI	3	nan	whiB7_A90S	whiB7	p.Ala90Ser	False
940	whiB7_c-114t	AMI	3	3568793	whiB7_c-114t	whiB7	c.-114C>T	False
941	whiB7_c-121t	AMI	3	3568800	whiB7_c-121t	whiB7	c.-121C>T	False
942	whiB7_c-140g	AMI	3	3568819	whiB7_c-140g	whiB7	c.-140C>G	False
943	whiB7_c-163g	AMI	3	3568842	whiB7_c-163g	whiB7	c.-163C>G	False
944	whiB7_c-193t	AMI	3	3568872	whiB7_c-193t	whiB7	c.-193C>T	False
945	whiB7_c-23a	AMI	3	3568702	whiB7_c-23a	whiB7	c.-23C>A	False
946	whiB7_c-240g	AMI	3	3568919	whiB7_c-240g	whiB7	c.-240C>G	False
947	whiB7_c-341a	AMI	3	3569020	whiB7_c-341a	whiB7	c.-341C>A	False
948	whiB7_c-353a	AMI	3	3569032	whiB7_c-353a	whiB7	c.-353C>A	False
949	whiB7_c-358t	AMI	3	3569037	whiB7_c-358t	whiB7	c.-358C>T	False
950	whiB7_c-66g	AMI	3	3568745	whiB7_c-66g	whiB7	c.-66C>G	False
951	whiB7_D26G	AMI	3	nan	whiB7_D26G	whiB7	p.Asp26Gly	False
952	whiB7_E69G	AMI	3	nan	whiB7_E69G	whiB7	p.Glu69Gly	False
953	whiB7_F29I	AMI	3	nan	whiB7_F29I	whiB7	p.Phe29Ile	False
954	whiB7_g-166a	AMI	3	3568845	whiB7_g-166a	whiB7	c.-166G>A	False
955	whiB7_g-200t	AMI	3	3568879	whiB7_g-200t	whiB7	c.-200G>T	False
956	whiB7_g-227c	AMI	3	3568906	whiB7_g-227c	whiB7	c.-227G>C	False
957	whiB7_G23D	AMI	3	nan	whiB7_G23D	whiB7	p.Gly23Asp	False
958	whiB7_g-278c	AMI	3	3568957	whiB7_g-278c	whiB7	c.-278G>C	False
959	whiB7_g-279t	AMI	3	3568958	whiB7_g-279t	whiB7	c.-279G>T	False
960	whiB7_g-321c	AMI	3	3569000	whiB7_g-321c	whiB7	c.-321G>C	False
961	whiB7_g-322c	AMI	3	3569001	whiB7_g-322c	whiB7	c.-322G>C	False
962	whiB7_g-328a	AMI	3	3569007	whiB7_g-328a	whiB7	c.-328G>A	False
963	whiB7_g-32a	AMI	3	3568711	whiB7_g-32a	whiB7	c.-32G>A	False
964	whiB7_g-355a	AMI	3	3569034	whiB7_g-355a	whiB7	c.-355G>A	False
965	whiB7_g-50a	AMI	3	3568729	whiB7_g-50a	whiB7	c.-50G>A	False
966	whiB7_g-55t	AMI	3	3568734	whiB7_g-55t	whiB7	c.-55G>T	False
967	whiB7_g-56t	AMI	3	3568735	whiB7_g-56t	whiB7	c.-56G>T	False
968	whiB7_H21Q	AMI	3	nan	whiB7_H21Q	whiB7	p.His21Gln	False
969	whiB7_I76V	AMI	3	nan	whiB7_I76V	whiB7	p.Ile76Val	False
970	whiB7_K40N	AMI	3	nan	whiB7_K40N	whiB7	p.Lys40Asn	False
971	whiB7_K88T	AMI	3	nan	whiB7_K88T	whiB7	p.Lys88Thr	False
972	whiB7_P16S	AMI	3	nan	whiB7_P16S	whiB7	p.Pro16Ser	False
973	whiB7_P33L	AMI	3	nan	whiB7_P33L	whiB7	p.Pro33Leu	False
974	whiB7_Q73R	AMI	3	nan	whiB7_Q73R	whiB7	p.Gln73Arg	False
975	whiB7_R50L	AMI	3	nan	whiB7_R50L	whiB7	p.Arg50Leu	False
976	whiB7_R50P	AMI	3	nan	whiB7_R50P	whiB7	p.Arg50Pro	False
977	whiB7_R59W	AMI	3	nan	whiB7_R59W	whiB7	p.Arg59Trp	False
978	whiB7_R81C	AMI	3	nan	whiB7_R81C	whiB7	p.Arg81Cys	False
979	whiB7_R87C	AMI	3	nan	whiB7_R87C	whiB7	p.Arg87Cys	False
980	whiB7_S78N	AMI	3	nan	whiB7_S78N	whiB7	p.Ser78Asn	False
981	whiB7_t-258g	AMI	3	3568937	whiB7_t-258g	whiB7	c.-258T>G	False
982	whiB7_T32N	AMI	3	nan	whiB7_T32N	whiB7	p.Thr32Asn	False
983	whiB7_t-360g	AMI	3	3569039	whiB7_t-360g	whiB7	c.-360T>G	False
984	whiB7_t-375c	AMI	3	3569054	whiB7_t-375c	whiB7	c.-375T>C	False
985	whiB7_V22I	AMI	3	nan	whiB7_V22I	whiB7	p.Val22Ile	False
986	whiB7_W63!	AMI	3	nan	whiB7_W63!	whiB7	p.Trp63*	False
987	aftB_A310V	AMI	3	nan	aftB_A310V	aftB	p.Ala310Val	False
988	aftB_A473V	AMI	3	nan	aftB_A473V	aftB	p.Ala473Val	False
989	aftB_A485T	AMI	3	nan	aftB_A485T	aftB	p.Ala485Thr	False
990	aftB_A516Q	AMI	3	nan	aftB_A516Q	aftB	p.Ala516Gln	False
991	aftB_A524G	AMI	3	nan	aftB_A524G	aftB	p.Ala524Gly	False
992	aftB_c-2t	AMI	3	4268838	aftB_c-2t	aftB	c.-2C>T	False
993	aftB_c-57t	AMI	3	4268893	aftB_c-57t	aftB	c.-57C>T	False
994	aftB_c-70a	AMI	3	4268906	aftB_c-70a	aftB	c.-70C>A	False
995	aftB_G103C	AMI	3	nan	aftB_G103C	aftB	p.Gly103Cys	False
996	aftB_G173C	AMI	3	nan	aftB_G173C	aftB	p.Gly173Cys	False
997	aftB_G384C	AMI	3	nan	aftB_G384C	aftB	p.Gly384Cys	False
998	aftB_H585Y	AMI	3	nan	aftB_H585Y	aftB	p.His585Tyr	False
999	aftB_L494V	AMI	3	nan	aftB_L494V	aftB	p.Leu494Val	False
1000	aftB_L98F	AMI	3	nan	aftB_L98F	aftB	p.Leu98Phe	False
1001	aftB_M491L	AMI	3	nan	aftB_M491L	aftB	p.Met491Leu	False
1002	aftB_M99I	AMI	3	nan	aftB_M99I	aftB	p.Met99Ile	False
1003	aftB_N458T	AMI	3	nan	aftB_N458T	aftB	p.Asn458Thr	False
1004	aftB_P548L	AMI	3	nan	aftB_P548L	aftB	p.Pro548Leu	False
1005	aftB_P621R	AMI	3	nan	aftB_P621R	aftB	p.Pro621Arg	False
1006	aftB_R467L	AMI	3	nan	aftB_R467L	aftB	p.Arg467Leu	False
1007	aftB_R601C	AMI	3	nan	aftB_R601C	aftB	p.Arg601Cys	False
1008	aftB_T282M	AMI	3	nan	aftB_T282M	aftB	p.Thr282Met	False
1009	aftB_V352G	AMI	3	nan	aftB_V352G	aftB	p.Val352Gly	False
1010	aftB_V511A	AMI	3	nan	aftB_V511A	aftB	p.Val511Ala	False
1011	aftB_W22R	AMI	3	nan	aftB_W22R	aftB	p.Trp22Arg	False
1012	aftB_Y106C	AMI	3	nan	aftB_Y106C	aftB	p.Tyr106Cys	False
1013	aftB_Y298C	AMI	3	nan	aftB_Y298C	aftB	p.Tyr298Cys	False
1014	ccsA_E74A	AMI	3	nan	ccsA_E74A	ccsA	p.Glu74Ala	False
1015	ccsA_F237S	AMI	3	nan	ccsA_F237S	ccsA	p.Phe237Ser	False
1016	ccsA_g-196t	AMI	3	619695	ccsA_g-196t (Rv0528_464)	ccsA	c.-196G>T	False
1017	ccsA_g-77t	AMI	3	619814	ccsA_g-77t (Rv0528_504)	ccsA	c.-77G>T	False
1018	ccsA_R199C	AMI	3	nan	ccsA_R199C	ccsA	p.Arg199Cys	False
1019	ccsA_T3M	AMI	3	nan	ccsA_T3M	ccsA	p.Thr3Met	False
1020	ccsA_V244M	AMI	3	nan	ccsA_V244M	ccsA	p.Val244Met	False
1021	ccsA_V27L	AMI	3	nan	ccsA_V27L	ccsA	p.Val27Leu	False
1022	eis_447_ins_21_a_aagcgcgcgaagcgtcggcgtg	AMI	3	2714886	eis_447_ins_21_a_aagcgcgcgaagcgtcggcgtg	eis	c.446_447insCACGCCGACGCTTCGCGCGCT	False
1023	eis_949_del_4_actcg_a	AMI	3	2714384	eis_949_del_4_actcg_a	eis	c.945_948del	False
1024	eis_a-13g	AMI	3	2715345	eis_a-13g	eis	c.-13A>G	False
1025	eis_A304V	AMI	3	nan	eis_A304V	eis	p.Ala304Val	False
1026	eis_c-12a	AMI	3	2715344	eis_c-12a	eis	c.-12C>A	False
1027	eis_E313D	AMI	3	nan	eis_E313D	eis	p.Glu313Asp	False
1028	eis_g-23t	AMI	3	2715355	eis_g-23t	eis	c.-23G>T	False
1029	eis_L140V	AMI	3	nan	eis_L140V	eis	p.Leu140Val	False
1030	eis_L18R	AMI	3	nan	eis_L18R	eis	p.Leu18Arg	False
1031	eis_Q272!	AMI	3	nan	eis_Q272!	eis	p.Gln272*	False
1032	eis_t-44c	AMI	3	2715376	eis_t-44c	eis	c.-44T>C	False
1033	eis_T4P	AMI	3	nan	eis_T4P	eis	p.Thr4Pro	False
1034	fprA_A106T	AMI	3	nan	fprA_A106T	fprA	p.Ala106Thr	False
1035	fprA_A15G	AMI	3	nan	fprA_A15G	fprA	p.Ala15Gly	False
1036	fprA_A19G	AMI	3	nan	fprA_A19G	fprA	p.Ala19Gly	False
1037	fprA_D219N	AMI	3	nan	fprA_D219N	fprA	p.Asp219Asn	False
1038	fprA_D231G	AMI	3	nan	fprA_D231G	fprA	p.Asp231Gly	False
1039	fprA_D408N	AMI	3	nan	fprA_D408N	fprA	p.Asp408Asn	False
1040	fprA_E117G	AMI	3	nan	fprA_E117G	fprA	p.Glu117Gly	False
1041	fprA_E117K	AMI	3	nan	fprA_E117K	fprA	p.Glu117Lys	False
1042	fprA_I225V	AMI	3	nan	fprA_I225V	fprA	p.Ile225Val	False
1043	fprA_N133H	AMI	3	nan	fprA_N133H	fprA	p.Asn133His	False
1044	fprA_Q405!	AMI	3	nan	fprA_Q405!	fprA	p.Gln405*	False
1045	fprA_R200Q	AMI	3	nan	fprA_R200Q	fprA	p.Arg200Gln	False
1046	fprA_R282P	AMI	3	nan	fprA_R282P	fprA	p.Arg282Pro	False
1047	fprA_W46G	AMI	3	nan	fprA_W46G	fprA	p.Trp46Gly	False
1048	rrs_-101_ins_1_t_tg	AMI	3	1471745	rrs_-101_ins_1_t_tg	rrs	c.-101_-100insG	False
1049	rrs_1075_ins_1_g_gt	AMI	3	1472920	rrs_1075_ins_1_g_gt	rrs	c.1075_1076insT	False
1050	rrs_1140_ins_2_tcgtga_tcgtgaga	AMI	3	1472985	rrs_1140_ins_2_tcgtga_tcgtgaga	rrs	c.1143_1144insGA|c.1144_1145insAG|c.1145_1146insGA	False
1051	rrs_-122_del_1_tcacat_tcaca	AMI	3	1471724	rrs_-122_del_1_tcacat_tcaca	rrs	c.-117del	False
1052	rrs_159_ins_1_c_ct	AMI	3	1472004	rrs_159_ins_1_c_ct	rrs	c.159_160insT	False
1053	rrs_181_ins_19_c_ccacgggatgcatgtcttgt	AMI	3	1472026	rrs_181_ins_19_c_ccacgggatgcatgtcttgt	rrs	c.181_182insCACGGGATGCATGTCTTGT	False
1054	rrs_255_ins_1_t_tg	AMI	3	1472100	rrs_255_ins_1_t_tg	rrs	c.255_256insG	False
1055	rrs_-81_ins_1_c_cg	AMI	3	1471765	rrs_-81_ins_1_c_cg	rrs	c.-81_-80insG	False
1056	rrs_a1145g	AMI	3	1472990	rrs_a1145g	rrs	n.1145A>G	False
1057	rrs_a1367g	AMI	3	1473212	rrs_a1367g	rrs	n.1367A>G	False
1058	rrs_a1409g	AMI	3	1473254	rrs_a1409g	rrs	n.1409A>G	False
1059	rrs_a-233g	AMI	3	1471613	rrs_a-233g	rrs	n.-233A>G	False
1060	rrs_a703c	AMI	3	1472548	rrs_a703c	rrs	n.703A>C	False
1061	rrs_c1110t	AMI	3	1472955	rrs_c1110t	rrs	n.1110C>T	False
1062	rrs_c1220g	AMI	3	1473065	rrs_c1220g	rrs	n.1220C>G	False
1063	rrs_c1257t	AMI	3	1473102	rrs_c1257t	rrs	n.1257C>T	False
1064	rrs_c141t	AMI	3	1471986	rrs_c141t	rrs	n.141C>T	False
1065	rrs_c-159t	AMI	3	1471687	rrs_c-159t	rrs	n.-159C>T	False
1066	rrs_c182g	AMI	3	1472027	rrs_c182g	rrs	n.182C>G	False
1067	rrs_c-197a	AMI	3	1471649	rrs_c-197a	rrs	n.-197C>A	False
1068	rrs_c-264t	AMI	3	1471582	rrs_c-264t	rrs	n.-264C>T	False
1069	rrs_c-34a	AMI	3	1471812	rrs_c-34a	rrs	n.-34C>A	False
1070	rrs_c708t	AMI	3	1472553	rrs_c708t	rrs	n.708C>T	False
1071	rrs_c799a	AMI	3	1472644	rrs_c799a	rrs	n.799C>A	False
1072	rrs_g1027a	AMI	3	1472872	rrs_g1027a	rrs	n.1027G>A	False
1073	rrs_g1142a	AMI	3	1472987	rrs_g1142a	rrs	n.1142G>A	False
1074	rrs_g1460a	AMI	3	1473305	rrs_g1460a	rrs	n.1460G>A	False
1075	rrs_g-186a	AMI	3	1471660	rrs_g-186a	rrs	n.-186G>A	False
1076	rrs_g187a	AMI	3	1472032	rrs_g187a	rrs	n.187G>A	False
1077	rrs_g-290t	AMI	3	1471556	rrs_g-290t (murA_412)	rrs	n.-290G>T	False
1078	rrs_g-314a	AMI	3	1471532	rrs_g-314a (murA_404)	rrs	n.-314G>A	False
1079	rrs_g47a	AMI	3	1471892	rrs_g47a	rrs	n.47G>A	False
1080	rrs_g72c	AMI	3	1471917	rrs_g72c	rrs	n.72G>C	False
1081	rrs_t1109c	AMI	3	1472954	rrs_t1109c	rrs	n.1109T>C	False
1082	rrs_t1111c	AMI	3	1472956	rrs_t1111c	rrs	n.1111T>C	False
1083	rrs_t1164a	AMI	3	1473009	rrs_t1164a	rrs	n.1164T>A	False
1084	rrs_t1465g	AMI	3	1473310	rrs_t1465g	rrs	n.1465T>G	False
1085	rrs_t16a	AMI	3	1471861	rrs_t16a	rrs	n.16T>A	False
1086	rrs_t-188c	AMI	3	1471658	rrs_t-188c	rrs	n.-188T>C	False
1087	rrs_t200a	AMI	3	1472045	rrs_t200a	rrs	n.200T>A	False
1088	rrs_t213c	AMI	3	1472058	rrs_t213c	rrs	n.213T>C	False
1089	rrs_t-256g	AMI	3	1471590	rrs_t-256g	rrs	n.-256T>G	False
1090	rrs_t268c	AMI	3	1472113	rrs_t268c	rrs	n.268T>C	False
1091	rrs_t-52g	AMI	3	1471794	rrs_t-52g	rrs	n.-52T>G	False
1092	rrs_t847c	AMI	3	1472692	rrs_t847c	rrs	n.847T>C	False
1093	whiB6_-111_del_83_tcctgttaatcagctgtgtatctggcctcgccggcgcgtatccgacccct_tgcgacagttcaggtgta	AMI	3	4338632	whiB6_-111_del_83_tcctgttaatcagctgtgtatctggcctcgccggcgcgtatccgacccct_tgcgacagttcaggtgta			True
1094	whiB6_112_del_1_ga_g	AMI	3	4338410	whiB6_112_del_1_ga_g	whiB6	c.111del	False
1095	whiB6_199_ins_1_cg_cgg	AMI	3	4338323	whiB6_199_ins_1_cg_cgg	whiB6	c.198_199insC|c.197_198insC	False
1096	whiB6_2_del_1_at_a	AMI	3	4338520	whiB6_2_del_1_at_a	whiB6	c.1del	False
1097	whiB6_214_ins_1_c_ca	AMI	3	4338308	whiB6_214_ins_1_c_ca	whiB6	c.213_214insT	False
1098	whiB6_230_del_1_gc_g	AMI	3	4338292	whiB6_230_del_1_gc_g	whiB6	c.229del	False
1099	whiB6_232_del_1_ctgc_cgc	AMI	3	4338290	whiB6_232_del_1_ctgc_cgc	whiB6	c.231del	False
1100	whiB6_232_del_1_ctgc_ctg	AMI	3	4338290	whiB6_232_del_1_ctgc_ctg	whiB6	c.229del	False
1101	whiB6_307_ins_1_cgttgcgctcggcca_cgttgcgctcggccag	AMI	3	4338215	whiB6_307_ins_1_cgttgcgctcggcca_cgttgcgctcggccag	whiB6	c.292_293insC	False
1102	whiB6_315_del_1_cgg_cg	AMI	3	4338207	whiB6_315_del_1_cgg_cg	whiB6	c.314del|c.313del	False
1103	whiB6_-66_del_1_agctccgagctctagt_agctccgagtttagt	AMI	3	4338587	whiB6_-66_del_1_agctccgagctctagt_agctccgagtttagt			True
1104	whiB6_-66_del_1_agctccgagctctagt_agctcggagtctagt	AMI	3	4338587	whiB6_-66_del_1_agctccgagctctagt_agctcggagtctagt			True
1105	whiB6_-66_del_1_agctccgagctctagt_agctctgagtctagt	AMI	3	4338587	whiB6_-66_del_1_agctccgagctctagt_agctctgagtctagt			True
1106	whiB6_-66_del_1_agctccgagctctagt_agcttcgagtctagt	AMI	3	4338587	whiB6_-66_del_1_agctccgagctctagt_agcttcgagtctagt			True
1107	whiB6_-66_del_3_agctccgagctctagt_agctccgagtcta	AMI	3	4338587	whiB6_-66_del_3_agctccgagctctagt_agctccgagtcta			True
1108	whiB6_-68_del_1_ctccgagc_caccgag	AMI	3	4338589	whiB6_-68_del_1_ctccgagc_caccgag			True
1109	whiB6_-68_del_1_ctccgagc_cgccgag	AMI	3	4338589	whiB6_-68_del_1_ctccgagc_cgccgag			True
1110	whiB6_-69_del_1_tccgagc_tgcgag	AMI	3	4338590	whiB6_-69_del_1_tccgagc_tgcgag			True
1111	whiB6_-70_del_1_ccgagc_cggag	AMI	3	4338591	whiB6_-70_del_1_ccgagc_cggag			True
1112	whiB6_-71_del_1_cgagc_cggg	AMI	3	4338592	whiB6_-71_del_1_cgagc_cggg			True
1113	whiB6_-72_del_1_gagc_gtg	AMI	3	4338593	whiB6_-72_del_1_gagc_gtg			True
1114	whiB6_-74_del_1_gct_gg	AMI	3	4338595	whiB6_-74_del_1_gct_gg			True
1115	whiB6_-74_del_1_gctct_gtca	AMI	3	4338595	whiB6_-74_del_1_gctct_gtca			True
1116	whiB6_-74_del_1_gctctagtgcgcgcaccgccgagtaccagg_gtctagtgcgcgcaccgccgagtaccaga	AMI	3	4338595	whiB6_-74_del_1_gctctagtgcgcgcaccgccgagtaccagg_gtctagtgcgcgcaccgccgagtaccaga			True
1117	whiB6_-74_del_1_gctctagtgcgcgcaccgccgagtaccagg_gtctagtgcgcgcaccgccgagtaccagc	AMI	3	4338595	whiB6_-74_del_1_gctctagtgcgcgcaccgccgagtaccagg_gtctagtgcgcgcaccgccgagtaccagc			True
1118	whiB6_-75_del_1_ct_c	AMI	3	4338596	whiB6_-75_del_1_ct_c	whiB6	c.-76del	False
1119	whiB6_-77_del_1_ctagt_cgga	AMI	3	4338598	whiB6_-77_del_1_ctagt_cgga			True
1120	whiB6_82_ins_1_c_cg	AMI	3	4338440	whiB6_82_ins_1_c_cg	whiB6	c.81_82insC	False
1121	whiB6_82_ins_1_c_ct	AMI	3	4338440	whiB6_82_ins_1_c_ct	whiB6	c.81_82insA	False
1122	whiB6_87_ins_1_g_ga	AMI	3	4338435	whiB6_87_ins_1_g_ga	whiB6	c.86_87insT	False
1123	whiB6_a-114g	AMI	3	4338635	whiB6_a-114g	whiB6	c.-114A>G	False
1124	whiB6_a-26g	AMI	3	4338547	whiB6_a-26g	whiB6	c.-26A>G	False
1125	whiB6_A66V	AMI	3	nan	whiB6_A66V	whiB6	p.Ala66Val	False
1126	whiB6_A6E	AMI	3	nan	whiB6_A6E	whiB6	p.Ala6Glu	False
1127	whiB6_A72E	AMI	3	nan	whiB6_A72E	whiB6	p.Ala72Glu	False
1128	whiB6_A87V	AMI	3	nan	whiB6_A87V	whiB6	p.Ala87Val	False
1129	whiB6_c-128a	AMI	3	4338649	whiB6_c-128a	whiB6	c.-128C>A	False
1130	whiB6_c-135t	AMI	3	4338656	whiB6_c-135t	whiB6	c.-135C>T	False
1131	whiB6_c-148t	AMI	3	4338669	whiB6_c-148t	whiB6	c.-148C>T	False
1132	whiB6_c-178t	AMI	3	4338699	whiB6_c-178t	whiB6	c.-178C>T	False
1133	whiB6_c-183g	AMI	3	4338704	whiB6_c-183g	whiB6	c.-183C>G	False
1134	whiB6_c-49t	AMI	3	4338570	whiB6_c-49t	whiB6	c.-49C>T	False
1135	whiB6_C62S	AMI	3	nan	whiB6_C62S	whiB6	p.Cys62Ser	False
1136	whiB6_c-62t	AMI	3	4338583	whiB6_c-62t	whiB6	c.-62C>T	False
1137	whiB6_c-91t	AMI	3	4338612	whiB6_c-91t	whiB6	c.-91C>T	False
1138	whiB6_D46E	AMI	3	nan	whiB6_D46E	whiB6	p.Asp46Glu	False
1139	whiB6_D46H	AMI	3	nan	whiB6_D46H	whiB6	p.Asp46His	False
1140	whiB6_F90S	AMI	3	nan	whiB6_F90S	whiB6	p.Phe90Ser	False
1141	whiB6_g-100a	AMI	3	4338621	whiB6_g-100a	whiB6	c.-100G>A	False
1142	whiB6_L95V	AMI	3	nan	whiB6_L95V	whiB6	p.Leu95Val	False
1143	whiB6_P45S	AMI	3	nan	whiB6_P45S	whiB6	p.Pro45Ser	False
1144	whiB6_Q94!	AMI	3	nan	whiB6_Q94!	whiB6	p.Gln94*	False
1145	whiB6_R17S	AMI	3	nan	whiB6_R17S	whiB6	p.Arg17Ser	False
1146	whiB6_t-110c	AMI	3	4338631	whiB6_t-110c	whiB6	c.-110T>C	False
1147	whiB6_t-122c	AMI	3	4338643	whiB6_t-122c	whiB6	c.-122T>C	False
1148	whiB6_t-193c	AMI	3	4338714	whiB6_t-193c	whiB6	c.-193T>C	False
1149	whiB6_t-19c	AMI	3	4338540	whiB6_t-19c	whiB6	c.-19T>C	False
1150	whiB6_T43P	AMI	3	nan	whiB6_T43P	whiB6	p.Thr43Pro	False
1151	whiB6_W16S	AMI	3	nan	whiB6_W16S	whiB6	p.Trp16Ser	False
1152	whiB6_W41C	AMI	3	nan	whiB6_W41C	whiB6	p.Trp41Cys	False
1153	whiB6_W60R	AMI	3	nan	whiB6_W60R	whiB6	p.Trp60Arg	False
1154	whiB6_W60S	AMI	3	nan	whiB6_W60S	whiB6	p.Trp60Ser	False
1155	whiB6_W76!	AMI	3	nan	whiB6_W76!	whiB6	p.Trp76*	False
1156	whiB7_-316_ins_1_gcc_gccc	AMI	3	3568995	whiB7_-316_ins_1_gcc_gccc	whiB7	c.-317_-316insG|c.-318_-317insG|c.-319_-318insG	False
1157	whiB7_c-154t	AMI	3	3568833	whiB7_c-154t	whiB7	c.-154C>T	False
1158	whiB7_D24H	AMI	3	nan	whiB7_D24H	whiB7	p.Asp24His	False
1159	whiB7_E69K	AMI	3	nan	whiB7_E69K	whiB7	p.Glu69Lys	False
1160	whiB7_g-124a	AMI	3	3568803	whiB7_g-124a	whiB7	c.-124G>A	False
1161	whiB7_g-250a	AMI	3	3568929	whiB7_g-250a	whiB7	c.-250G>A	False
1162	whiB7_g-55a	AMI	3	3568734	whiB7_g-55a	whiB7	c.-55G>A	False
1163	whiB7_P62T	AMI	3	nan	whiB7_P62T	whiB7	p.Pro62Thr	False
1164	whiB7_R12K	AMI	3	nan	whiB7_R12K	whiB7	p.Arg12Lys	False
1165	whiB7_t-151a	AMI	3	3568830	whiB7_t-151a	whiB7	c.-151T>A	False
1166	whiB7_t-235c	AMI	3	3568914	whiB7_t-235c	whiB7	c.-235T>C	False
1167	whiB7_t-401g	AMI	3	3569080	whiB7_t-401g	whiB7	c.-401T>G	False
1168	whiB7_V3A	AMI	3	nan	whiB7_V3A	whiB7	p.Val3Ala	False
1169	aftB_a-119g	AMI	3	4268955	aftB_a-119g (ubiA_293)	aftB	c.-119A>G	False
1170	aftB_a-122g	AMI	3	4268958	aftB_a-122g (ubiA_292)	aftB	c.-122A>G	False
1171	aftB_A131S	AMI	3	nan	aftB_A131S	aftB	p.Ala131Ser	False
1172	aftB_A265T	AMI	3	nan	aftB_A265T	aftB	p.Ala265Thr	False
1173	aftB_A417D	AMI	3	nan	aftB_A417D	aftB	p.Ala417Asp	False
1174	aftB_c-120t	AMI	3	4268956	aftB_c-120t (ubiA_293)	aftB	c.-120C>T	False
1175	aftB_D428Y	AMI	3	nan	aftB_D428Y	aftB	p.Asp428Tyr	False
1176	aftB_D431G	AMI	3	nan	aftB_D431G	aftB	p.Asp431Gly	False
1177	aftB_g-110a	AMI	3	4268946	aftB_g-110a (ubiA_296)	aftB	c.-110G>A	False
1178	aftB_g-16a	AMI	3	4268852	aftB_g-16a	aftB	c.-16G>A	False
1179	aftB_G18A	AMI	3	nan	aftB_G18A	aftB	p.Gly18Ala	False
1180	aftB_g-22a	AMI	3	4268858	aftB_g-22a	aftB	c.-22G>A	False
1181	aftB_G70S	AMI	3	nan	aftB_G70S	aftB	p.Gly70Ser	False
1182	aftB_G71S	AMI	3	nan	aftB_G71S	aftB	p.Gly71Ser	False
1183	aftB_g-82a	AMI	3	4268918	aftB_g-82a	aftB	c.-82G>A	False
1184	aftB_L67M	AMI	3	nan	aftB_L67M	aftB	p.Leu67Met	False
1185	aftB_L79M	AMI	3	nan	aftB_L79M	aftB	p.Leu79Met	False
1186	aftB_M77L	AMI	3	nan	aftB_M77L	aftB	p.Met77Leu	False
1187	aftB_N259D	AMI	3	nan	aftB_N259D	aftB	p.Asn259Asp	False
1188	aftB_R303Q	AMI	3	nan	aftB_R303Q	aftB	p.Arg303Gln	False
1189	aftB_R401H	AMI	3	nan	aftB_R401H	aftB	p.Arg401His	False
1190	aftB_S137A	AMI	3	nan	aftB_S137A	aftB	p.Ser137Ala	False
1191	aftB_S21G	AMI	3	nan	aftB_S21G	aftB	p.Ser21Gly	False
1192	aftB_S386A	AMI	3	nan	aftB_S386A	aftB	p.Ser386Ala	False
1193	aftB_t-104c	AMI	3	4268940	aftB_t-104c (ubiA_298)	aftB	c.-104T>C	False
1194	aftB_t-113c	AMI	3	4268949	aftB_t-113c (ubiA_295)	aftB	c.-113T>C	False
1195	aftB_T11M	AMI	3	nan	aftB_T11M	aftB	p.Thr11Met	False
1196	aftB_V144A	AMI	3	nan	aftB_V144A	aftB	p.Val144Ala	False
1197	aftB_V185A	AMI	3	nan	aftB_V185A	aftB	p.Val185Ala	False
1198	aftB_V274A	AMI	3	nan	aftB_V274A	aftB	p.Val274Ala	False
1199	aftB_V372G	AMI	3	nan	aftB_V372G	aftB	p.Val372Gly	False
1200	aftB_V438I	AMI	3	nan	aftB_V438I	aftB	p.Val438Ile	False
1201	aftB_V69A	AMI	3	nan	aftB_V69A	aftB	p.Val69Ala	False
1202	aftB_W546G	AMI	3	nan	aftB_W546G	aftB	p.Trp546Gly	False
1203	ccsA_A158T	AMI	3	nan	ccsA_A158T	ccsA	p.Ala158Thr	False
1204	ccsA_A229S	AMI	3	nan	ccsA_A229S	ccsA	p.Ala229Ser	False
1205	ccsA_E205D	AMI	3	nan	ccsA_E205D	ccsA	p.Glu205Asp	False
1206	ccsA_E209D	AMI	3	nan	ccsA_E209D	ccsA	p.Glu209Asp	False
1207	ccsA_G208N	AMI	3	nan	ccsA_G208N	ccsA	p.Gly208Asn	False
1208	ccsA_G210S	AMI	3	nan	ccsA_G210S	ccsA	p.Gly210Ser	False
1209	ccsA_G214R	AMI	3	nan	ccsA_G214R	ccsA	p.Gly214Arg	False
1210	ccsA_G227R	AMI	3	nan	ccsA_G227R	ccsA	p.Gly227Arg	False
1211	ccsA_L212P	AMI	3	nan	ccsA_L212P	ccsA	p.Leu212Pro	False
1212	ccsA_L219F	AMI	3	nan	ccsA_L219F	ccsA	p.Leu219Phe	False
1213	ccsA_M215L	AMI	3	nan	ccsA_M215L	ccsA	p.Met215Leu	False
1214	ccsA_P144S	AMI	3	nan	ccsA_P144S	ccsA	p.Pro144Ser	False
1215	ccsA_R133Q	AMI	3	nan	ccsA_R133Q	ccsA	p.Arg133Gln	False
1216	ccsA_R202P	AMI	3	nan	ccsA_R202P	ccsA	p.Arg202Pro	False
1217	ccsA_R217G	AMI	3	nan	ccsA_R217G	ccsA	p.Arg217Gly	False
1218	ccsA_S120C	AMI	3	nan	ccsA_S120C	ccsA	p.Ser120Cys	False
1219	ccsA_T207G	AMI	3	nan	ccsA_T207G	ccsA	p.Thr207Gly	False
1220	ccsA_T56A	AMI	3	nan	ccsA_T56A	ccsA	p.Thr56Ala	False
1221	ccsA_V127I	AMI	3	nan	ccsA_V127I	ccsA	p.Val127Ile	False
1222	ccsA_V143F	AMI	3	nan	ccsA_V143F	ccsA	p.Val143Phe	False
1223	ccsA_V143L	AMI	3	nan	ccsA_V143L	ccsA	p.Val143Leu	False
1224	ccsA_V191I	AMI	3	nan	ccsA_V191I	ccsA	p.Val191Ile	False
1225	ccsA_V198L	AMI	3	nan	ccsA_V198L	ccsA	p.Val198Leu	False
1226	ccsA_Y134H	AMI	3	nan	ccsA_Y134H	ccsA	p.Tyr134His	False
1227	eis_1030_ins_1_c_cg	AMI	3	2714303	eis_1030_ins_1_c_cg	eis	c.1029_1030insC	False
1228	eis_46_ins_1_t_tc	AMI	3	2715287	eis_46_ins_1_t_tc	eis	c.45_46insG	False
1229	eis_808_del_2_gggt_gg	AMI	3	2714525	eis_808_del_2_gggt_gg	eis	c.805_806del	False
1230	eis_810_del_2_atgggt_atgg	AMI	3	2714523	eis_810_del_2_atgggt_atgg	eis	c.805_806del	False
1231	eis_A86V	AMI	3	nan	eis_A86V	eis	p.Ala86Val	False
1232	eis_E401D	AMI	3	nan	eis_E401D	eis	p.Glu401Asp	False
1233	eis_G188A	AMI	3	nan	eis_G188A	eis	p.Gly188Ala	False
1234	eis_P30H	AMI	3	nan	eis_P30H	eis	p.Pro30His	False
1235	eis_T136S	AMI	3	nan	eis_T136S	eis	p.Thr136Ser	False
1236	eis_T231I	AMI	3	nan	eis_T231I	eis	p.Thr231Ile	False
1237	eis_V301I	AMI	3	nan	eis_V301I	eis	p.Val301Ile	False
1238	fprA_a-120c	AMI	3	3473887	fprA_a-120c (prfB_6)	fprA	c.-120A>C	False
1239	fprA_A124T	AMI	3	nan	fprA_A124T	fprA	p.Ala124Thr	False
1240	fprA_a-157g	AMI	3	3473850	fprA_a-157g (prfB_19)	fprA	c.-157A>G	False
1241	fprA_A303S	AMI	3	nan	fprA_A303S	fprA	p.Ala303Ser	False
1242	fprA_A315V	AMI	3	nan	fprA_A315V	fprA	p.Ala315Val	False
1243	fprA_A375S	AMI	3	nan	fprA_A375S	fprA	p.Ala375Ser	False
1244	fprA_c-118a	AMI	3	3473889	fprA_c-118a (prfB_6)	fprA	c.-118C>A	False
1245	fprA_c-159g	AMI	3	3473848	fprA_c-159g (prfB_19)	fprA	c.-159C>G	False
1246	fprA_c-164g	AMI	3	3473843	fprA_c-164g (prfB_21)	fprA	c.-164C>G	False
1247	fprA_D31H	AMI	3	nan	fprA_D31H	fprA	p.Asp31His	False
1248	fprA_D336E	AMI	3	nan	fprA_D336E	fprA	p.Asp336Glu	False
1249	fprA_E400G	AMI	3	nan	fprA_E400G	fprA	p.Glu400Gly	False
1250	fprA_E72A	AMI	3	nan	fprA_E72A	fprA	p.Glu72Ala	False
1251	fprA_g-114c	AMI	3	3473893	fprA_g-114c (prfB_4)	fprA	c.-114G>C	False
1252	fprA_g-129t	AMI	3	3473878	fprA_g-129t (prfB_9)	fprA	c.-129G>T	False
1253	fprA_G190S	AMI	3	nan	fprA_G190S	fprA	p.Gly190Ser	False
1254	fprA_G298E	AMI	3	nan	fprA_G298E	fprA	p.Gly298Glu	False
1255	fprA_G339A	AMI	3	nan	fprA_G339A	fprA	p.Gly339Ala	False
1256	fprA_G91S	AMI	3	nan	fprA_G91S	fprA	p.Gly91Ser	False
1257	fprA_I348V	AMI	3	nan	fprA_I348V	fprA	p.Ile348Val	False
1258	fprA_K305R	AMI	3	nan	fprA_K305R	fprA	p.Lys305Arg	False
1259	fprA_L313P	AMI	3	nan	fprA_L313P	fprA	p.Leu313Pro	False
1260	fprA_L32P	AMI	3	nan	fprA_L32P	fprA	p.Leu32Pro	False
1261	fprA_M111A	AMI	3	nan	fprA_M111A	fprA	p.Met111Ala	False
1262	fprA_M34I	AMI	3	nan	fprA_M34I	fprA	p.Met34Ile	False
1263	fprA_N349E	AMI	3	nan	fprA_N349E	fprA	p.Asn349Glu	False
1264	fprA_P352R	AMI	3	nan	fprA_P352R	fprA	p.Pro352Arg	False
1265	fprA_P364S	AMI	3	nan	fprA_P364S	fprA	p.Pro364Ser	False
1266	fprA_P90A	AMI	3	nan	fprA_P90A	fprA	p.Pro90Ala	False
1267	fprA_Q337K	AMI	3	nan	fprA_Q337K	fprA	p.Gln337Lys	False
1268	fprA_S296T	AMI	3	nan	fprA_S296T	fprA	p.Ser296Thr	False
1269	fprA_S299T	AMI	3	nan	fprA_S299T	fprA	p.Ser299Thr	False
1270	fprA_S338T	AMI	3	nan	fprA_S338T	fprA	p.Ser338Thr	False
1271	fprA_T234N	AMI	3	nan	fprA_T234N	fprA	p.Thr234Asn	False
1272	fprA_T28G	AMI	3	nan	fprA_T28G	fprA	p.Thr28Gly	False
1273	fprA_T29S	AMI	3	nan	fprA_T29S	fprA	p.Thr29Ser	False
1274	fprA_V344T	AMI	3	nan	fprA_V344T	fprA	p.Val344Thr	False
1275	fprA_V83S	AMI	3	nan	fprA_V83S	fprA	p.Val83Ser	False
1276	rrs_-109_ins_1_gttatttttggc_gttatttttgggc	AMI	3	1471737	rrs_-109_ins_1_gttatttttggc_gttatttttgggc	rrs	c.-101_-100insG|c.-100_-99insG|c.-99_-98insG	False
1277	rrs_-127_ins_3_tggtttcacatttttgttgttatttttggccatgctcttgatgccccgtt_tctttttatttgttgttgtttttggccatacctagcactccccgtgtgtg	AMI	3	1471719	rrs_-127_ins_3_tggtttcacatttttgttgttatttttggccatgctcttgatgccccgtt_tctttttatttgttgttgtttttggccatacctagcactccccgtgtgtg			True
1278	rrs_-210_del_1_ga_g	AMI	3	1471636	rrs_-210_del_1_ga_g	rrs	c.-209del	False
1279	rrs_-42_ins_1_tctaaatacc_tctaaaatacc	AMI	3	1471804	rrs_-42_ins_1_tctaaatacc_tctaaaatacc	rrs	c.-40_-39insA|c.-39_-38insA|c.-38_-37insA|c.-37_-36insA	False
1280	rrs_5_ins_1_g_gc	AMI	3	1471850	rrs_5_ins_1_g_gc	rrs	c.5_6insC	False
1281	rrs_a1012g	AMI	3	1472857	rrs_a1012g	rrs	n.1012A>G	False
1282	rrs_a1278g	AMI	3	1473123	rrs_a1278g	rrs	n.1278A>G	False
1283	rrs_a-192g	AMI	3	1471654	rrs_a-192g	rrs	n.-192A>G	False
1284	rrs_a-259c	AMI	3	1471587	rrs_a-259c	rrs	n.-259A>C	False
1285	rrs_a504g	AMI	3	1472349	rrs_a504g	rrs	n.504A>G	False
1286	rrs_c-231t	AMI	3	1471615	rrs_c-231t	rrs	n.-231C>T	False
1287	rrs_c905g	AMI	3	1472750	rrs_c905g	rrs	n.905C>G	False
1288	rrs_g1148a	AMI	3	1472993	rrs_g1148a	rrs	n.1148G>A	False
1289	rrs_g1285a	AMI	3	1473130	rrs_g1285a	rrs	n.1285G>A	False
1290	rrs_g-190a	AMI	3	1471656	rrs_g-190a	rrs	n.-190G>A	False
1291	rrs_g-263a	AMI	3	1471583	rrs_g-263a	rrs	n.-263G>A	False
1292	rrs_g655c	AMI	3	1472500	rrs_g655c	rrs	n.655G>C	False
1293	rrs_t1011c	AMI	3	1472856	rrs_t1011c	rrs	n.1011T>C	False
1294	rrs_t23c	AMI	3	1471868	rrs_t23c	rrs	n.23T>C	False
1295	rrs_t-32g	AMI	3	1471814	rrs_t-32g	rrs	n.-32T>G	False
1296	whiB6_122_ins_1_c_ca	AMI	3	4338400	whiB6_122_ins_1_c_ca	whiB6	c.121_122insT	False
1297	whiB6_-66_del_1_agctccgagctctagt_agcgccgagtctagt	AMI	3	4338587	whiB6_-66_del_1_agctccgagctctagt_agcgccgagtctagt			True
1298	whiB6_-66_del_1_agctccgagctctagt_agctccgagcctagt	AMI	3	4338587	whiB6_-66_del_1_agctccgagctctagt_agctccgagcctagt	whiB6	c.-76del	False
1299	whiB6_-66_del_1_agctccgagctctagt_agctccgagtccagt	AMI	3	4338587	whiB6_-66_del_1_agctccgagctctagt_agctccgagtccagt			True
1300	whiB6_-66_del_1_agctccgagctctagt_agctccgagtctcga	AMI	3	4338587	whiB6_-66_del_1_agctccgagctctagt_agctccgagtctcga			True
1301	whiB6_-70_del_118_ccgagctctagtgcgcgcaccgccgagtaccagggcatagatcctgttaa_ctgacatgcgacagttcaggtgta	AMI	3	4338591	whiB6_-70_del_118_ccgagctctagtgcgcgcaccgccgagtaccagggcatagatcctgttaa_ctgacatgcgacagttcaggtgta			True
1302	whiB6_-73_del_1_agctct_agtct	AMI	3	4338594	whiB6_-73_del_1_agctct_agtct	whiB6	c.-75del	False
1303	whiB6_-74_del_1_gctc_gtg	AMI	3	4338595	whiB6_-74_del_1_gctc_gtg			True
1304	whiB6_-74_del_1_gctcta_gtctc	AMI	3	4338595	whiB6_-74_del_1_gctcta_gtctc			True
1305	whiB6_-74_del_1_gctcta_gtctg	AMI	3	4338595	whiB6_-74_del_1_gctcta_gtctg			True
1306	whiB6_a-127g	AMI	3	4338648	whiB6_a-127g	whiB6	c.-127A>G	False
1307	whiB6_A55D	AMI	3	nan	whiB6_A55D	whiB6	p.Ala55Asp	False
1308	whiB6_A63T	AMI	3	nan	whiB6_A63T	whiB6	p.Ala63Thr	False
1309	whiB6_A63V	AMI	3	nan	whiB6_A63V	whiB6	p.Ala63Val	False
1310	whiB6_A77E	AMI	3	nan	whiB6_A77E	whiB6	p.Ala77Glu	False
1311	whiB6_c-115a	AMI	3	4338636	whiB6_c-115a	whiB6	c.-115C>A	False
1312	whiB6_c-165t	AMI	3	4338686	whiB6_c-165t	whiB6	c.-165C>T	False
1313	whiB6_g-141c	AMI	3	4338662	whiB6_g-141c	whiB6	c.-141G>C	False
1314	whiB6_g-158c	AMI	3	4338679	whiB6_g-158c	whiB6	c.-158G>C	False
1315	whiB6_g-27a	AMI	3	4338548	whiB6_g-27a	whiB6	c.-27G>A	False
1316	whiB6_G78V	AMI	3	nan	whiB6_G78V	whiB6	p.Gly78Val	False
1317	whiB6_g-93c	AMI	3	4338614	whiB6_g-93c	whiB6	c.-93G>C	False
1318	whiB6_P105Q	AMI	3	nan	whiB6_P105Q	whiB6	p.Pro105Gln	False
1319	whiB6_P38S	AMI	3	nan	whiB6_P38S	whiB6	p.Pro38Ser	False
1320	whiB6_R64L	AMI	3	nan	whiB6_R64L	whiB6	p.Arg64Leu	False
1321	whiB6_R96G	AMI	3	nan	whiB6_R96G	whiB6	p.Arg96Gly	False
1322	whiB6_t-179c	AMI	3	4338700	whiB6_t-179c	whiB6	c.-179T>C	False
1323	whiB6_t-2c	AMI	3	4338523	whiB6_t-2c	whiB6	c.-2T>C	False
1324	whiB6_T42M	AMI	3	nan	whiB6_T42M	whiB6	p.Thr42Met	False
1325	whiB6_T44I	AMI	3	nan	whiB6_T44I	whiB6	p.Thr44Ile	False
1326	whiB6_W76G	AMI	3	nan	whiB6_W76G	whiB6	p.Trp76Gly	False
1327	whiB7_-204_ins_1_g_gt	AMI	3	3568883	whiB7_-204_ins_1_g_gt	whiB7	c.-205_-204insA	False
1328	whiB7_-214_del_1_tg_t	AMI	3	3568893	whiB7_-214_del_1_tg_t	whiB7	c.-215del	False
1329	whiB7_a-24g	AMI	3	3568703	whiB7_a-24g	whiB7	c.-24A>G	False
1330	whiB7_c-139a	AMI	3	3568818	whiB7_c-139a	whiB7	c.-139C>A	False
1331	whiB7_c-217g	AMI	3	3568896	whiB7_c-217g	whiB7	c.-217C>G	False
1332	whiB7_c-71g	AMI	3	3568750	whiB7_c-71g	whiB7	c.-71C>G	False
1333	whiB7_t-360c	AMI	3	3569039	whiB7_t-360c	whiB7	c.-360T>C	False
1334	aftB_A115V	AMI	3	nan	aftB_A115V	aftB	p.Ala115Val	False
1335	aftB_A295T	AMI	3	nan	aftB_A295T	aftB	p.Ala295Thr	False
1336	aftB_D248G	AMI	3	nan	aftB_D248G	aftB	p.Asp248Gly	False
1337	aftB_I126V	AMI	3	nan	aftB_I126V	aftB	p.Ile126Val	False
1338	aftB_I407V	AMI	3	nan	aftB_I407V	aftB	p.Ile407Val	False
1339	aftB_M254A	AMI	3	nan	aftB_M254A	aftB	p.Met254Ala	False
1340	aftB_M465I	AMI	3	nan	aftB_M465I	aftB	p.Met465Ile	False
1341	aftB_M465V	AMI	3	nan	aftB_M465V	aftB	p.Met465Val	False
1342	aftB_V128L	AMI	3	nan	aftB_V128L	aftB	p.Val128Leu	False
1343	ccsA_A132P	AMI	3	nan	ccsA_A132P	ccsA	p.Ala132Pro	False
1344	ccsA_I123V	AMI	3	nan	ccsA_I123V	ccsA	p.Ile123Val	False
1345	ccsA_V274I	AMI	3	nan	ccsA_V274I	ccsA	p.Val274Ile	False
1346	eis_L386I	AMI	3	nan	eis_L386I	eis	p.Leu386Ile	False
1347	eis_P342L	AMI	3	nan	eis_P342L	eis	p.Pro342Leu	False
1348	eis_T70A	AMI	3	nan	eis_T70A	eis	p.Thr70Ala	False
1349	eis_t-9c	AMI	3	2715341	eis_t-9c	eis	c.-9T>C	False
1350	fprA_A174T	AMI	3	nan	fprA_A174T	fprA	p.Ala174Thr	False
1351	fprA_A238V	AMI	3	nan	fprA_A238V	fprA	p.Ala238Val	False
1352	fprA_A71V	AMI	3	nan	fprA_A71V	fprA	p.Ala71Val	False
1353	fprA_c-133a	AMI	3	3473874	fprA_c-133a (prfB_11)	fprA	c.-133C>A	False
1354	fprA_D37N	AMI	3	nan	fprA_D37N	fprA	p.Asp37Asn	False
1355	fprA_G130S	AMI	3	nan	fprA_G130S	fprA	p.Gly130Ser	False
1356	fprA_Q316R	AMI	3	nan	fprA_Q316R	fprA	p.Gln316Arg	False
1357	fprA_T365N	AMI	3	nan	fprA_T365N	fprA	p.Thr365Asn	False
1358	rrs_-10_ins_14_agtgtttggg_agtgtttgggttttgtttggagag	AMI	3	1471836	rrs_-10_ins_14_agtgtttggg_agtgtttgggttttgtttggagag	rrs	c.-2_-1insGTTTTGTTTGGAGA|c.-1_0insTTTTGTTTGGAGAG	False
1359	rrs_a1449g	AMI	3	1473294	rrs_a1449g	rrs	n.1449A>G	False
1360	rrs_a-180c	AMI	3	1471666	rrs_a-180c	rrs	n.-180A>C	False
1361	rrs_c-212t	AMI	3	1471634	rrs_c-212t	rrs	n.-212C>T	False
1362	rrs_c-226g	AMI	3	1471620	rrs_c-226g	rrs	n.-226C>G	False
1363	rrs_g-235c	AMI	3	1471611	rrs_g-235c	rrs	n.-235G>C	False
1364	rrs_t213g	AMI	3	1472058	rrs_t213g	rrs	n.213T>G	False
1365	rrs_t23g	AMI	3	1471868	rrs_t23g	rrs	n.23T>G	False
1366	rrs_t-92g	AMI	3	1471754	rrs_t-92g	rrs	n.-92T>G	False
1367	whiB6_156_del_1_cag_ca	AMI	3	4338366	whiB6_156_del_1_cag_ca	whiB6	c.154del	False
1368	whiB6_-66_del_1_agctccgagctctagt_agctccaagtctagt	AMI	3	4338587	whiB6_-66_del_1_agctccgagctctagt_agctccaagtctagt			True
1369	whiB6_-66_del_1_agctccgagctctagt_agctcccagtctagt	AMI	3	4338587	whiB6_-66_del_1_agctccgagctctagt_agctcccagtctagt			True
1370	whiB6_93_del_309_gagcgggacctcatacagggcggttactgtcatgtctacgttcctccaga_g	AMI	3	4338429	whiB6_93_del_309_gagcgggacctcatacagggcggttactgtcatgtctacgttcctccaga_g	whiB6	c.-216_92del	False
1371	whiB6_A25P	AMI	3	nan	whiB6_A25P	whiB6	p.Ala25Pro	False
1372	whiB6_a-26c	AMI	3	4338547	whiB6_a-26c	whiB6	c.-26A>C	False
1373	whiB6_c-126g	AMI	3	4338647	whiB6_c-126g	whiB6	c.-126C>G	False
1374	whiB6_C12S	AMI	3	nan	whiB6_C12S	whiB6	p.Cys12Ser	False
1375	whiB6_C53W	AMI	3	nan	whiB6_C53W	whiB6	p.Cys53Trp	False
1376	whiB6_D46A	AMI	3	nan	whiB6_D46A	whiB6	p.Asp46Ala	False
1377	whiB6_D46G	AMI	3	nan	whiB6_D46G	whiB6	p.Asp46Gly	False
1378	whiB6_E28Q	AMI	3	nan	whiB6_E28Q	whiB6	p.Glu28Gln	False
1379	whiB6_G85D	AMI	3	nan	whiB6_G85D	whiB6	p.Gly85Asp	False
1380	whiB6_L95P	AMI	3	nan	whiB6_L95P	whiB6	p.Leu95Pro	False
1381	whiB6_M1V	AMI	3	nan	whiB6_M1V	whiB6	p.Met1Val	False
1382	whiB6_P82L	AMI	3	nan	whiB6_P82L	whiB6	p.Pro82Leu	False
1383	whiB6_R101C	AMI	3	nan	whiB6_R101C	whiB6	p.Arg101Cys	False
1384	whiB6_R40C	AMI	3	nan	whiB6_R40C	whiB6	p.Arg40Cys	False
1385	whiB6_t-12c	AMI	3	4338533	whiB6_t-12c	whiB6	c.-12T>C	False
1386	whiB6_W16C	AMI	3	nan	whiB6_W16C	whiB6	p.Trp16Cys	False
1387	whiB6_W60!	AMI	3	nan	whiB6_W60!	whiB6	p.Trp60*	False
1388	whiB7_-165_del_1_gc_g	AMI	3	3568844	whiB7_-165_del_1_gc_g	whiB7	c.-166del	False
1389	whiB7_c-407t	AMI	3	3569086	whiB7_c-407t	whiB7	c.-407C>T	False
1390	whiB7_g-56a	AMI	3	3568735	whiB7_g-56a	whiB7	c.-56G>A	False
1391	aftB_A449T	AMI	3	nan	aftB_A449T	aftB	p.Ala449Thr	False
1392	aftB_I353T	AMI	3	nan	aftB_I353T	aftB	p.Ile353Thr	False
1393	aftB_L266P	AMI	3	nan	aftB_L266P	aftB	p.Leu266Pro	False
1394	aftB_R300W	AMI	3	nan	aftB_R300W	aftB	p.Arg300Trp	False
1395	ccsA_c-22a	AMI	3	619869	ccsA_c-22a (Rv0528_522)	ccsA	c.-22C>A	False
1396	ccsA_R131C	AMI	3	nan	ccsA_R131C	ccsA	p.Arg131Cys	False
1397	eis_A243V	AMI	3	nan	eis_A243V	eis	p.Ala243Val	False
1398	eis_V1V	AMI	3	nan	eis_V1V	eis	p.Val1Val	False
1399	fprA_E311G	AMI	3	nan	fprA_E311G	fprA	p.Glu311Gly	False
1400	fprA_L447R	AMI	3	nan	fprA_L447R	fprA	p.Leu447Arg	False
1401	rrs_a908g	AMI	3	1472753	rrs_a908g	rrs	n.908A>G	False
1402	rrs_c1112t	AMI	3	1472957	rrs_c1112t	rrs	n.1112C>T	False
1403	rrs_c-193t	AMI	3	1471653	rrs_c-193t	rrs	n.-193C>T	False
1404	rrs_g1323t	AMI	3	1473168	rrs_g1323t	rrs	n.1323G>T	False
1405	rrs_g204a	AMI	3	1472049	rrs_g204a	rrs	n.204G>A	False
1406	rrs_g891a	AMI	3	1472736	rrs_g891a	rrs	n.891G>A	False
1407	whiB6_189_ins_1_t_tg	AMI	3	4338333	whiB6_189_ins_1_t_tg	whiB6	c.188_189insC	False
1408	whiB6_77_del_1_agggcggt_aggcggt	AMI	3	4338445	whiB6_77_del_1_agggcggt_aggcggt	whiB6	c.76del|c.75del|c.74del	False
1409	whiB6_a-29t	AMI	3	4338550	whiB6_a-29t	whiB6	c.-29A>T	False
1410	whiB6_A63E	AMI	3	nan	whiB6_A63E	whiB6	p.Ala63Glu	False
1411	whiB6_a-81t	AMI	3	4338602	whiB6_a-81t	whiB6	c.-81A>T	False
1412	whiB6_C34Y	AMI	3	nan	whiB6_C34Y	whiB6	p.Cys34Tyr	False
1413	whiB6_D47G	AMI	3	nan	whiB6_D47G	whiB6	p.Asp47Gly	False
1414	whiB6_g-24a	AMI	3	4338545	whiB6_g-24a	whiB6	c.-24G>A	False
1415	whiB6_N102D	AMI	3	nan	whiB6_N102D	whiB6	p.Asn102Asp	False
1416	whiB6_R54G	AMI	3	nan	whiB6_R54G	whiB6	p.Arg54Gly	False
1417	whiB6_R96!	AMI	3	nan	whiB6_R96!	whiB6	p.Arg96*	False
1418	whiB6_t-79c	AMI	3	4338600	whiB6_t-79c	whiB6	c.-79T>C	False
1419	whiB7_g-289a	AMI	3	3568968	whiB7_g-289a	whiB7	c.-289G>A	False
1420	ccsA_D226N	AMI	3	nan	ccsA_D226N	ccsA	p.Asp226Asn	False
1421	eis_P193S	AMI	3	nan	eis_P193S	eis	p.Pro193Ser	False
1422	fprA_256_ins_1_g_ga	AMI	3	3474262	fprA_256_ins_1_g_ga	fprA	c.256_257insA	False
1423	fprA_L455R	AMI	3	nan	fprA_L455R	fprA	p.Leu455Arg	False
1424	fprA_P115L	AMI	3	nan	fprA_P115L	fprA	p.Pro115Leu	False
1425	fprA_P188S	AMI	3	nan	fprA_P188S	fprA	p.Pro188Ser	False
1426	fprA_S94A	AMI	3	nan	fprA_S94A	fprA	p.Ser94Ala	False
1427	rrs_-26_ins_10_tcccttt_tcccttttccaaaggga	AMI	3	1471820	rrs_-26_ins_10_tcccttt_tcccttttccaaaggga	rrs	c.-20_-19insTCCAAAGGGA	False
1428	rrs_a-198c	AMI	3	1471648	rrs_a-198c	rrs	n.-198A>C	False
1429	rrs_c1021t	AMI	3	1472866	rrs_c1021t	rrs	n.1021C>T	False
1430	rrs_c1153t	AMI	3	1472998	rrs_c1153t	rrs	n.1153C>T	False
1431	rrs_g1176a	AMI	3	1473021	rrs_g1176a	rrs	n.1176G>A	False
1432	whiB6_-66_del_1_agctccgagctctagt_agctccgagactagt	AMI	3	4338587	whiB6_-66_del_1_agctccgagctctagt_agctccgagactagt			True
1433	whiB6_-66_del_1_agctccgagctctagt_agctccgaggctagt	AMI	3	4338587	whiB6_-66_del_1_agctccgagctctagt_agctccgaggctagt			True
1434	whiB6_-66_del_1_agctccgagctctagt_agctccgagtgtagt	AMI	3	4338587	whiB6_-66_del_1_agctccgagctctagt_agctccgagtgtagt			True
1435	whiB6_-72_del_1_gagc_gag	AMI	3	4338593	whiB6_-72_del_1_gagc_gag	whiB6	c.-75del	False
1436	whiB6_-74_del_1_gctct_gtcg	AMI	3	4338595	whiB6_-74_del_1_gctct_gtcg			True
1437	whiB6_-74_del_1_gctct_gtct	AMI	3	4338595	whiB6_-74_del_1_gctct_gtct	whiB6	c.-75del	False
1438	whiB6_a-125g	AMI	3	4338646	whiB6_a-125g	whiB6	c.-125A>G	False
1439	whiB6_E8K	AMI	3	nan	whiB6_E8K	whiB6	p.Glu8Lys	False
1440	whiB6_M1T	AMI	3	nan	whiB6_M1T	whiB6	p.Met1Thr	False
1441	whiB6_R59W	AMI	3	nan	whiB6_R59W	whiB6	p.Arg59Trp	False
1442	whiB6_Y3C	AMI	3	nan	whiB6_Y3C	whiB6	p.Tyr3Cys	False
1443	whiB7_P11S	AMI	3	nan	whiB7_P11S	whiB7	p.Pro11Ser	False
1444	whiB7_Q58R	AMI	3	nan	whiB7_Q58R	whiB7	p.Gln58Arg	False
1445	aftB_L151F	AMI	3	nan	aftB_L151F	aftB	p.Leu151Phe	False
1446	fprA_L173S	AMI	3	nan	fprA_L173S	fprA	p.Leu173Ser	False
1447	rrs_c1141t	AMI	3	1472986	rrs_c1141t	rrs	n.1141C>T	False
1448	rrs_g142a	AMI	3	1471987	rrs_g142a	rrs	n.142G>A	False
1449	rrs_g-65a	AMI	3	1471781	rrs_g-65a	rrs	n.-65G>A	False
1450	whiB6_279_del_1_gc_g	AMI	3	4338243	whiB6_279_del_1_gc_g	whiB6	c.278del	False
1451	whiB6_-74_del_1_gctctagtgcgcg_gtctagtgcgca	AMI	3	4338595	whiB6_-74_del_1_gctctagtgcgcg_gtctagtgcgca			True
1452	whiB6_a-76g	AMI	3	4338597	whiB6_a-76g	whiB6	c.-76A>G	False
1453	whiB6_A77S	AMI	3	nan	whiB6_A77S	whiB6	p.Ala77Ser	False
1454	whiB6_a-78g	AMI	3	4338599	whiB6_a-78g	whiB6	c.-78A>G	False
1455	whiB6_g-77a	AMI	3	4338598	whiB6_g-77a	whiB6	c.-77G>A	False
1456	whiB7_-306_ins_2_g_gcc	AMI	3	3568985	whiB7_-306_ins_2_g_gcc	whiB7	c.-307_-306insGG	False
1457	aftB_L172F	AMI	3	nan	aftB_L172F	aftB	p.Leu172Phe	False
1458	eis_448_del_1_ga_g	AMI	3	2714885	eis_448_del_1_ga_g	eis	c.447del	False
1459	fprA_M38T	AMI	3	nan	fprA_M38T	fprA	p.Met38Thr	False
1460	rrs_g1379a	AMI	3	1473224	rrs_g1379a	rrs	n.1379G>A	False
1461	whiB6_82_ins_1_c_ca	AMI	3	4338440	whiB6_82_ins_1_c_ca	whiB6	c.81_82insT	False
1462	whiB6_c-14t	AMI	3	4338535	whiB6_c-14t	whiB6	c.-14C>T	False
1463	whiB6_D37G	AMI	3	nan	whiB6_D37G	whiB6	p.Asp37Gly	False
1464	whiB6_E8D	AMI	3	nan	whiB6_E8D	whiB6	p.Glu8Asp	False
1465	whiB6_g-75a	AMI	3	4338596	whiB6_g-75a	whiB6	c.-75G>A	False
1466	whiB6_M21T	AMI	3	nan	whiB6_M21T	whiB6	p.Met21Thr	False
1467	whiB6_P57L	AMI	3	nan	whiB6_P57L	whiB6	p.Pro57Leu	False
1468	whiB6_R110W	AMI	3	nan	whiB6_R110W	whiB6	p.Arg110Trp	False
1469	whiB6_R54P	AMI	3	nan	whiB6_R54P	whiB6	p.Arg54Pro	False
1470	whiB6_V79G	AMI	3	nan	whiB6_V79G	whiB6	p.Val79Gly	False
1471	whiB6_W41!	AMI	3	nan	whiB6_W41!	whiB6	p.Trp41*	False
1472	whiB7_a-89g	AMI	3	3568768	whiB7_a-89g	whiB7	c.-89A>G	False
1473	rrs_g5t	AMI	3	1471850	rrs_g5t	rrs	n.5G>T	False
1474	whiB6_6_ins_42_t_tcgcattaaccgacgggtcggcccaggctgtcggggcgggaag	AMI	3	4338516	whiB6_6_ins_42_t_tcgcattaaccgacgggtcggcccaggctgtcggggcgggaag	whiB6	c.5_6insCTTCCCGCCCCGACAGCCTGGGCCGACCCGTCGGTTAATGCG	False
1475	whiB6_c-190a	AMI	3	4338711	whiB6_c-190a	whiB6	c.-190C>A	False
1476	whiB6_R88W	AMI	3	nan	whiB6_R88W	whiB6	p.Arg88Trp	False
1477	whiB6_V79A	AMI	3	nan	whiB6_V79A	whiB6	p.Val79Ala	False
1478	whiB7_-213_del_1_atggggggttc_atgggggttc	AMI	3	3568892	whiB7_-213_del_1_atggggggttc_atgggggttc	whiB7	c.-215del|c.-216del|c.-217del|c.-218del|c.-219del|c.-220del	False
1479	ccsA_g-69t	AMI	3	619822	ccsA_g-69t (Rv0528_506)	ccsA	c.-69G>T	False
1480	fprA_A238T	AMI	3	nan	fprA_A238T	fprA	p.Ala238Thr	False
1481	whiB6_307_del_1_cgttgcgctcggcca_cgttgcgctcgcca	AMI	3	4338215	whiB6_307_del_1_cgttgcgctcggcca_cgttgcgctcgcca	whiB6	c.297del|c.296del	False
1482	whiB6_-66_del_1_agctccgagctctagt_agctgagagtctagt	AMI	3	4338587	whiB6_-66_del_1_agctccgagctctagt_agctgagagtctagt			True
1483	whiB6_-66_del_1_agctccgagctctagt_agctgcgagtctagt	AMI	3	4338587	whiB6_-66_del_1_agctccgagctctagt_agctgcgagtctagt			True
1484	whiB6_c-109a	AMI	3	4338630	whiB6_c-109a	whiB6	c.-109C>A	False
1485	whiB6_S115A	AMI	3	nan	whiB6_S115A	whiB6	p.Ser115Ala	False
1486	eis_H270Q	AMI	3	nan	eis_H270Q	eis	p.His270Gln	False
1487	fprA_808_del_1_cg_c	AMI	3	3474814	fprA_808_del_1_cg_c	fprA	c.809del	False
1488	rrs_c905a	AMI	3	1472750	rrs_c905a	rrs	n.905C>A	False
1489	whiB6_A72G	AMI	3	nan	whiB6_A72G	whiB6	p.Ala72Gly	False
1490	whiB6_G85S	AMI	3	nan	whiB6_G85S	whiB6	p.Gly85Ser	False
1491	whiB6_V23G	AMI	3	nan	whiB6_V23G	whiB6	p.Val23Gly	False
1492	aftB_V544M	AMI	3	nan	aftB_V544M	aftB	p.Val544Met	False
1493	ccsA_g-196a	AMI	3	619695	ccsA_g-196a (Rv0528_464)	ccsA	c.-196G>A	False
1494	fprA_S299R	AMI	3	nan	fprA_S299R	fprA	p.Ser299Arg	False
1495	rrs_g-199a	AMI	3	1471647	rrs_g-199a	rrs	n.-199G>A	False
1496	whiB6_R40H	AMI	3	nan	whiB6_R40H	whiB6	p.Arg40His	False
1497	whiB6_T44P	AMI	3	nan	whiB6_T44P	whiB6	p.Thr44Pro	False
1498	aftB_E563G	AMI	3	nan	aftB_E563G	aftB	p.Glu563Gly	False
1499	aftB_Q561R	AMI	3	nan	aftB_Q561R	aftB	p.Gln561Arg	False
1500	fprA_S420P	AMI	3	nan	fprA_S420P	fprA	p.Ser420Pro	False
1501	rrs_a514t	AMI	3	1472359	rrs_a514t	rrs	n.514A>T	False
1502	whiB7_t-386c	AMI	3	3569065	whiB7_t-386c	whiB7	c.-386T>C	False
1503	ccsA_g-76c	AMI	3	619815	ccsA_g-76c (Rv0528_504)	ccsA	c.-76G>C	False
1504	rrs_642_ins_1_c_ct	AMI	3	1472487	rrs_642_ins_1_c_ct	rrs	c.642_643insT	False
1505	whiB6_-66_del_1_agctccgagctctagt_agctccgcgtctagt	AMI	3	4338587	whiB6_-66_del_1_agctccgagctctagt_agctccgcgtctagt			True
1506	whiB6_t-16c	AMI	3	4338537	whiB6_t-16c	whiB6	c.-16T>C	False
1507	whiB7_a-350g	AMI	3	3569029	whiB7_a-350g	whiB7	c.-350A>G	False
1508	rrs_t-324g	AMI	3	1471522	rrs_t-324g (murA_401)	rrs	n.-324T>G	False
1509	whiB6_-72_del_1_gagc_gcg	AMI	3	4338593	whiB6_-72_del_1_gagc_gcg			True
1510	whiB6_-72_del_1_gagc_ggg	AMI	3	4338593	whiB6_-72_del_1_gagc_ggg			True
1511	whiB6_L52Q	AMI	3	nan	whiB6_L52Q	whiB6	p.Leu52Gln	False
1512	whiB7_c-195t	AMI	3	3568874	whiB7_c-195t	whiB7	c.-195C>T	False
1513	rrs_a908c	AMI	3	1472753	rrs_a908c	rrs	n.908A>C	False
1514	fprA_G232S	AMI	3	nan	fprA_G232S	fprA	p.Gly232Ser	False
1515	whiB6_236_del_1_ac_a	AMI	3	4338286	whiB6_236_del_1_ac_a	whiB6	c.235del	False
1516	whiB6_293_ins_1_a_ag	AMI	3	4338229	whiB6_293_ins_1_a_ag	whiB6	c.292_293insC	False
1517	whiB6_-73_del_1_agct_agt	AMI	3	4338594	whiB6_-73_del_1_agct_agt	whiB6	c.-75del	False
1518	aftB_I327V	AMI	3	nan	aftB_I327V	aftB	p.Ile327Val	False
1519	fprA_V141I	AMI	3	nan	fprA_V141I	fprA	p.Val141Ile	False
1520	rrs_g-199c	AMI	3	1471647	rrs_g-199c	rrs	n.-199G>C	False
1521	whiB6_Y27!	AMI	3	nan	whiB6_Y27!	whiB6	p.Tyr27*	False
1522	whiB6_P38A	AMI	3	nan	whiB6_P38A	whiB6	p.Pro38Ala	False
1523	whiB7_c-53t	AMI	3	3568732	whiB7_c-53t	whiB7	c.-53C>T	False
1524	aftB_S469L	AMI	3	nan	aftB_S469L	aftB	p.Ser469Leu	False
1525	eis_c-15g	AMI	3	2715347	eis_c-15g	eis	c.-15C>G	False
1526	whiB6_-66_del_1_agctccgagctctagt_agctccgtgtctagt	AMI	3	4338587	whiB6_-66_del_1_agctccgagctctagt_agctccgtgtctagt			True
1527	whiB6_A66T	AMI	3	nan	whiB6_A66T	whiB6	p.Ala66Thr	False
1528	whiB6_C53G	AMI	3	nan	whiB6_C53G	whiB6	p.Cys53Gly	False
1529	whiB6_S97P	AMI	3	nan	whiB6_S97P	whiB6	p.Ser97Pro	False
1530	whiB7_a-116g	AMI	3	3568795	whiB7_a-116g	whiB7	c.-116A>G	False
1531	whiB6_-66_del_1_agctccgagctctagt_agctccgggtctagt	AMI	3	4338587	whiB6_-66_del_1_agctccgagctctagt_agctccgggtctagt			True
1532	whiB6_a-54g	AMI	3	4338575	whiB6_a-54g	whiB6	c.-54A>G	False
1533	rrs_t-202c	AMI	3	1471644	rrs_t-202c	rrs	n.-202T>C	False
1534	eis_c-8a	AMI	3	2715340	eis_c-8a	eis	c.-8C>A	False
1535	aftB_N40D	AMI	3	nan	aftB_N40D	aftB	p.Asn40Asp	False
1536	aftB_t-25c	AMI	3	4268861	aftB_t-25c	aftB	c.-25T>C	False
1537	whiB6_a-114c	AMI	3	4338635	whiB6_a-114c	whiB6	c.-114A>C	False
1538	ccsA_R257C	AMI	3	nan	ccsA_R257C	ccsA	p.Arg257Cys	False
1539	rrs_t-4g	AMI	3	1471842	rrs_t-4g	rrs	n.-4T>G	False
1540	whiB6_P38L	AMI	3	nan	whiB6_P38L	whiB6	p.Pro38Leu	False
1541	rrs_g878a	AMI	3	1472723	rrs_g878a	rrs	n.878G>A	False
1542	whiB7_g-242c	AMI	3	3568921	whiB7_g-242c	whiB7	c.-242G>C	False
1543	whiB6_-66_del_1_agctccgagctctagt_agctccgagtctggt	AMI	3	4338587	whiB6_-66_del_1_agctccgagctctagt_agctccgagtctggt			True
1544	whiB7_-175_del_1_ac_a	AMI	3	3568854	whiB7_-175_del_1_ac_a	whiB7	c.-176del	False
1545	fprA_D98G	AMI	3	nan	fprA_D98G	fprA	p.Asp98Gly	False
1546	whiB6_Q94E	AMI	3	nan	whiB6_Q94E	whiB6	p.Gln94Glu	False
1547	rrs_c-187t	AMI	5	1471659	rrs_c-187t	rrs	n.-187C>T	False
1548	aftB_D397G	AMI	5	nan	aftB_D397G	aftB	p.Asp397Gly	False
1549	ccsA_I245M	AMI	5	nan	ccsA_I245M	ccsA	p.Ile245Met	False
1550	whiB6_-66_del_1_agctccgagctctagt_agctccgagtctagt	AMI	5	4338587	whiB6_-66_del_1_agctccgagctctagt_agctccgagtctagt	whiB6	c.-75del	False
1551	whiB6_-74_del_1_gc_g	AMI	5	4338595	whiB6_-74_del_1_gc_g	whiB6	c.-75del	False
1552	rrs_a514c	AMI	5	1472359	rrs_a514c	rrs	n.514A>C	False
1553	whiB6_-73_del_1_agc_ag	AMI	5	4338594	whiB6_-73_del_1_agc_ag	whiB6	c.-75del	False
1554	whiB6_T51P	AMI	5	nan	whiB6_T51P	whiB6	p.Thr51Pro	False
1555	fprA_N385D	AMI	5	nan	fprA_N385D	fprA	p.Asn385Asp	False
1556	whiB6_-74_del_1_gct_gt	AMI	5	4338595	whiB6_-74_del_1_gct_gt	whiB6	c.-75del	False
1557	whiB6_c-82t	AMI	5	4338603	whiB6_c-82t	whiB6	c.-82C>T	False
1558	eis_V163I	AMI	5	nan	eis_V163I	eis	p.Val163Ile	False
1559	rrs_c517t	AMI	5	1472362	rrs_c517t	rrs	n.517C>T	False
1560	eis_c-12t	AMI	5	2715344	eis_c-12t	eis	c.-12C>T	False
1561	ccsA_V27I	AMI	5	nan	ccsA_V27I	ccsA	p.Val27Ile	False
1562	whiB6_R107C	AMI	5	nan	whiB6_R107C	whiB6	p.Arg107Cys	False
1563	rrs_c492t	AMI	5	1472337	rrs_c492t	rrs	n.492C>T	False
1564	eis_807_del_2_ggt_g	AMI	5	2714526	eis_807_del_2_ggt_g	eis	c.805_806del	False
1565	whiB7_192_del_1_gc_g	AMI	5	3568488	whiB7_192_del_1_gc_g	whiB7	c.191del	False
1566	whiB6_R54Q	AMI	5	nan	whiB6_R54Q	whiB6	p.Arg54Gln	False
1567	whiB7_c-178t	AMI	5	3568857	whiB7_c-178t	whiB7	c.-178C>T	False
1568	whiB7_t-100c	AMI	5	3568779	whiB7_t-100c	whiB7	c.-100T>C	False
1569	whiB6_-74_del_1_gctctagtg_gtctagta	AMI	5	4338595	whiB6_-74_del_1_gctctagtg_gtctagta			True
1570	aftB_V293M	AMI	5	nan	aftB_V293M	aftB	p.Val293Met	False
1571	Rv1979c_R409Q	BDQ	3	nan	Rv1979c_R409Q	Rv1979c	p.Arg409Gln	False
1572	Rv0678_141_ins_1_t_tc	BDQ	3	779130	Rv0678_141_ins_1_t_tc	Rv0678	c.141_142insC	False
1573	Rv1979c_D249E	BDQ	3	nan	Rv1979c_D249E	Rv1979c	p.Asp249Glu	False
1574	Rv1979c_D286G	BDQ	3	nan	Rv1979c_D286G	Rv1979c	p.Asp286Gly	False
1575	Rv0678_464_ins_2_g_ggc	BDQ	3	779453	Rv0678_464_ins_2_g_ggc	Rv0678	c.464_465insGC	False
1576	Rv0678_A36V	BDQ	3	nan	Rv0678_A36V	Rv0678	p.Ala36Val	False
1577	mmpL5_L709I	BDQ	3	nan	mmpL5_L709I	mmpL5	p.Leu709Ile	False
1578	Rv0678_107_ins_1_c_cg	BDQ	3	779096	Rv0678_107_ins_1_c_cg	Rv0678	c.107_108insG	False
1579	Rv0678_15_del_1_cg_c	BDQ	3	779004	Rv0678_15_del_1_cg_c	Rv0678	c.16del	False
1580	Rv0678_324_ins_1_ccggg_ccgggg	BDQ	3	779313	Rv0678_324_ins_1_ccggg_ccgggg	Rv0678	c.325_326insG|c.326_327insG|c.327_328insG|c.328_329insG	False
1581	Rv0678_A99P	BDQ	3	nan	Rv0678_A99P	Rv0678	p.Ala99Pro	False
1582	Rv0678_F19S	BDQ	3	nan	Rv0678_F19S	Rv0678	p.Phe19Ser	False
1583	Rv0678_G121R	BDQ	3	nan	Rv0678_G121R	Rv0678	p.Gly121Arg	False
1584	Rv0678_I67L	BDQ	3	nan	Rv0678_I67L	Rv0678	p.Ile67Leu	False
1585	Rv0678_I67S	BDQ	3	nan	Rv0678_I67S	Rv0678	p.Ile67Ser	False
1586	Rv0678_L136P	BDQ	3	nan	Rv0678_L136P	Rv0678	p.Leu136Pro	False
1587	Rv0678_L40F	BDQ	3	nan	Rv0678_L40F	Rv0678	p.Leu40Phe	False
1588	Rv0678_L40M	BDQ	3	nan	Rv0678_L40M	Rv0678	p.Leu40Met	False
1589	Rv0678_R109P	BDQ	3	nan	Rv0678_R109P	Rv0678	p.Arg109Pro	False
1590	Rv0678_S68N	BDQ	3	nan	Rv0678_S68N	Rv0678	p.Ser68Asn	False
1591	mmpL5_V123I	BDQ	3	nan	mmpL5_V123I	mmpL5	p.Val123Ile	False
1592	pepQ_818_ins_1_a_ac	BDQ	3	2859601	pepQ_818_ins_1_a_ac	pepQ	c.817_818insG	False
1593	Rv0678_274_ins_1_t_ta	BDQ	3	779263	Rv0678_274_ins_1_t_ta	Rv0678	c.274_275insA	False
1594	Rv0678_I108V	BDQ	3	nan	Rv0678_I108V	Rv0678	p.Ile108Val	False
1595	Rv0678_P48L	BDQ	3	nan	Rv0678_P48L	Rv0678	p.Pro48Leu	False
1596	atpE_E61D	BDQ	3	nan	atpE_E61D	atpE	p.Glu61Asp	False
1597	Rv0678_Q51R	BDQ	3	nan	Rv0678_Q51R	Rv0678	p.Gln51Arg	False
1598	Rv0678_R90C	BDQ	3	nan	Rv0678_R90C	Rv0678	p.Arg90Cys	False
1599	Rv0678_192_ins_1_cg_cgg	BDQ	3	779181	Rv0678_192_ins_1_cg_cgg	Rv0678	c.192_193insG|c.193_194insG	False
1600	mmpS5_g-74t	BDQ	3	778979	mmpS5_g-74t	mmpS5	c.-74G>T	False
1601	atpE_A18S	BDQ	3	nan	atpE_A18S	atpE	p.Ala18Ser	False
1602	atpE_A45V	BDQ	3	nan	atpE_A45V	atpE	p.Ala45Val	False
1603	atpE_A62T	BDQ	3	nan	atpE_A62T	atpE	p.Ala62Thr	False
1604	atpE_G12S	BDQ	3	nan	atpE_G12S	atpE	p.Gly12Ser	False
1605	atpE_g-60t	BDQ	3	1460985	atpE_g-60t (atpB_248)	atpE	c.-60G>T	False
1606	atpE_S37A	BDQ	3	nan	atpE_S37A	atpE	p.Ser37Ala	False
1607	atpE_t-41c	BDQ	3	1461004	atpE_t-41c	atpE	c.-41T>C	False
1608	atpE_T51I	BDQ	3	nan	atpE_T51I	atpE	p.Thr51Ile	False
1609	atpE_V39I	BDQ	3	nan	atpE_V39I	atpE	p.Val39Ile	False
1610	mmpL5_1000_ins_1_t_ta	BDQ	3	777481	mmpL5_1000_ins_1_t_ta	mmpL5	c.999_1000insT	False
1611	mmpL5_1169_ins_2_g_ggc	BDQ	3	777312	mmpL5_1169_ins_2_g_ggc	mmpL5	c.1168_1169insGC	False
1612	mmpL5_1436_del_2_gat_g	BDQ	3	777045	mmpL5_1436_del_2_gat_g	mmpL5	c.1434_1435del	False
1613	mmpL5_1680_del_15_catccccgtcatctga_c	BDQ	3	776801	mmpL5_1680_del_15_catccccgtcatctga_c	mmpL5	c.1665_1679del	False
1614	mmpL5_1767_del_1_ct_c	BDQ	3	776714	mmpL5_1767_del_1_ct_c	mmpL5	c.1766del	False
1615	mmpL5_1926_del_12_gatcatctcgggc_g	BDQ	3	776555	mmpL5_1926_del_12_gatcatctcgggc_g	mmpL5	c.1914_1925del	False
1616	mmpL5_2182_ins_1_t_tc	BDQ	3	776299	mmpL5_2182_ins_1_t_tc	mmpL5	c.2181_2182insG	False
1617	mmpL5_2203_ins_2_t_tgc	BDQ	3	776278	mmpL5_2203_ins_2_t_tgc	mmpL5	c.2202_2203insGC	False
1618	mmpL5_247_del_1_cg_c	BDQ	3	778234	mmpL5_247_del_1_cg_c	mmpL5	c.246del	False
1619	mmpL5_2487_del_13_gatacccaggatgt_g	BDQ	3	775994	mmpL5_2487_del_13_gatacccaggatgt_g	mmpL5	c.2474_2486del	False
1620	mmpL5_27_ins_1_c_ca	BDQ	3	778454	mmpL5_27_ins_1_c_ca	mmpL5	c.26_27insT	False
1621	mmpL5_2865_ins_1_c_cg	BDQ	3	775616	mmpL5_2865_ins_1_c_cg	mmpL5	c.2864_2865insC	False
1622	mmpL5_389_ins_1_c_ca	BDQ	3	778092	mmpL5_389_ins_1_c_ca	mmpL5	c.388_389insT	False
1623	mmpL5_418_del_12_gggcgccggtggc_g	BDQ	3	778063	mmpL5_418_del_12_gggcgccggtggc_g	mmpL5	c.406_417del	False
1624	mmpL5_A209T	BDQ	3	nan	mmpL5_A209T	mmpL5	p.Ala209Thr	False
1625	mmpL5_A230T	BDQ	3	nan	mmpL5_A230T	mmpL5	p.Ala230Thr	False
1626	mmpL5_A273T	BDQ	3	nan	mmpL5_A273T	mmpL5	p.Ala273Thr	False
1627	mmpL5_A288P	BDQ	3	nan	mmpL5_A288P	mmpL5	p.Ala288Pro	False
1628	mmpL5_A385T	BDQ	3	nan	mmpL5_A385T	mmpL5	p.Ala385Thr	False
1629	mmpL5_A434T	BDQ	3	nan	mmpL5_A434T	mmpL5	p.Ala434Thr	False
1630	mmpL5_A44G	BDQ	3	nan	mmpL5_A44G	mmpL5	p.Ala44Gly	False
1631	mmpL5_A572V	BDQ	3	nan	mmpL5_A572V	mmpL5	p.Ala572Val	False
1632	mmpL5_A667S	BDQ	3	nan	mmpL5_A667S	mmpL5	p.Ala667Ser	False
1633	mmpL5_A679D	BDQ	3	nan	mmpL5_A679D	mmpL5	p.Ala679Asp	False
1634	mmpL5_A69V	BDQ	3	nan	mmpL5_A69V	mmpL5	p.Ala69Val	False
1635	mmpL5_A800S	BDQ	3	nan	mmpL5_A800S	mmpL5	p.Ala800Ser	False
1636	mmpL5_A801V	BDQ	3	nan	mmpL5_A801V	mmpL5	p.Ala801Val	False
1637	mmpL5_A8V	BDQ	3	nan	mmpL5_A8V	mmpL5	p.Ala8Val	False
1638	mmpL5_D128A	BDQ	3	nan	mmpL5_D128A	mmpL5	p.Asp128Ala	False
1639	mmpL5_D128H	BDQ	3	nan	mmpL5_D128H	mmpL5	p.Asp128His	False
1640	mmpL5_D143G	BDQ	3	nan	mmpL5_D143G	mmpL5	p.Asp143Gly	False
1641	mmpL5_D608Y	BDQ	3	nan	mmpL5_D608Y	mmpL5	p.Asp608Tyr	False
1642	mmpL5_E174Q	BDQ	3	nan	mmpL5_E174Q	mmpL5	p.Glu174Gln	False
1643	mmpL5_E476A	BDQ	3	nan	mmpL5_E476A	mmpL5	p.Glu476Ala	False
1644	mmpL5_E512A	BDQ	3	nan	mmpL5_E512A	mmpL5	p.Glu512Ala	False
1645	mmpL5_E524G	BDQ	3	nan	mmpL5_E524G	mmpL5	p.Glu524Gly	False
1646	mmpL5_E83K	BDQ	3	nan	mmpL5_E83K	mmpL5	p.Glu83Lys	False
1647	mmpL5_F129S	BDQ	3	nan	mmpL5_F129S	mmpL5	p.Phe129Ser	False
1648	mmpL5_F816L	BDQ	3	nan	mmpL5_F816L	mmpL5	p.Phe816Leu	False
1649	mmpL5_F82L	BDQ	3	nan	mmpL5_F82L	mmpL5	p.Phe82Leu	False
1650	mmpL5_F916S	BDQ	3	nan	mmpL5_F916S	mmpL5	p.Phe916Ser	False
1651	mmpL5_G102D	BDQ	3	nan	mmpL5_G102D	mmpL5	p.Gly102Asp	False
1652	mmpL5_G181D	BDQ	3	nan	mmpL5_G181D	mmpL5	p.Gly181Asp	False
1653	mmpL5_G257R	BDQ	3	nan	mmpL5_G257R	mmpL5	p.Gly257Arg	False
1654	mmpL5_G336S	BDQ	3	nan	mmpL5_G336S	mmpL5	p.Gly336Ser	False
1655	mmpL5_G505S	BDQ	3	nan	mmpL5_G505S	mmpL5	p.Gly505Ser	False
1656	mmpL5_G559A	BDQ	3	nan	mmpL5_G559A	mmpL5	p.Gly559Ala	False
1657	mmpL5_G748D	BDQ	3	nan	mmpL5_G748D	mmpL5	p.Gly748Asp	False
1658	mmpL5_G759S	BDQ	3	nan	mmpL5_G759S	mmpL5	p.Gly759Ser	False
1659	mmpL5_G85E	BDQ	3	nan	mmpL5_G85E	mmpL5	p.Gly85Glu	False
1660	mmpL5_G875R	BDQ	3	nan	mmpL5_G875R	mmpL5	p.Gly875Arg	False
1661	mmpL5_G876D	BDQ	3	nan	mmpL5_G876D	mmpL5	p.Gly876Asp	False
1662	mmpL5_H494Y	BDQ	3	nan	mmpL5_H494Y	mmpL5	p.His494Tyr	False
1663	mmpL5_H540R	BDQ	3	nan	mmpL5_H540R	mmpL5	p.His540Arg	False
1664	mmpL5_H656Y	BDQ	3	nan	mmpL5_H656Y	mmpL5	p.His656Tyr	False
1665	mmpL5_H77N	BDQ	3	nan	mmpL5_H77N	mmpL5	p.His77Asn	False
1666	mmpL5_I113T	BDQ	3	nan	mmpL5_I113T	mmpL5	p.Ile113Thr	False
1667	mmpL5_I282L	BDQ	3	nan	mmpL5_I282L	mmpL5	p.Ile282Leu	False
1668	mmpL5_I484T	BDQ	3	nan	mmpL5_I484T	mmpL5	p.Ile484Thr	False
1669	mmpL5_I829V	BDQ	3	nan	mmpL5_I829V	mmpL5	p.Ile829Val	False
1670	mmpL5_I841V	BDQ	3	nan	mmpL5_I841V	mmpL5	p.Ile841Val	False
1671	mmpL5_I910V	BDQ	3	nan	mmpL5_I910V	mmpL5	p.Ile910Val	False
1672	mmpL5_K467R	BDQ	3	nan	mmpL5_K467R	mmpL5	p.Lys467Arg	False
1673	mmpL5_K646Q	BDQ	3	nan	mmpL5_K646Q	mmpL5	p.Lys646Gln	False
1674	mmpL5_K649T	BDQ	3	nan	mmpL5_K649T	mmpL5	p.Lys649Thr	False
1675	mmpL5_K80Q	BDQ	3	nan	mmpL5_K80Q	mmpL5	p.Lys80Gln	False
1676	mmpL5_L116V	BDQ	3	nan	mmpL5_L116V	mmpL5	p.Leu116Val	False
1677	mmpL5_L329R	BDQ	3	nan	mmpL5_L329R	mmpL5	p.Leu329Arg	False
1678	mmpL5_L523P	BDQ	3	nan	mmpL5_L523P	mmpL5	p.Leu523Pro	False
1679	mmpL5_L600R	BDQ	3	nan	mmpL5_L600R	mmpL5	p.Leu600Arg	False
1680	mmpL5_L751F	BDQ	3	nan	mmpL5_L751F	mmpL5	p.Leu751Phe	False
1681	mmpL5_L810F	BDQ	3	nan	mmpL5_L810F	mmpL5	p.Leu810Phe	False
1682	mmpL5_L836F	BDQ	3	nan	mmpL5_L836F	mmpL5	p.Leu836Phe	False
1683	mmpL5_L95R	BDQ	3	nan	mmpL5_L95R	mmpL5	p.Leu95Arg	False
1684	mmpL5_M1I	BDQ	3	nan	mmpL5_M1I	mmpL5	p.Met1Ile	False
1685	mmpL5_M218V	BDQ	3	nan	mmpL5_M218V	mmpL5	p.Met218Val	False
1686	mmpL5_M443I	BDQ	3	nan	mmpL5_M443I	mmpL5	p.Met443Ile	False
1687	mmpL5_M443T	BDQ	3	nan	mmpL5_M443T	mmpL5	p.Met443Thr	False
1688	mmpL5_M503I	BDQ	3	nan	mmpL5_M503I	mmpL5	p.Met503Ile	False
1689	mmpL5_M503R	BDQ	3	nan	mmpL5_M503R	mmpL5	p.Met503Arg	False
1690	mmpL5_M560T	BDQ	3	nan	mmpL5_M560T	mmpL5	p.Met560Thr	False
1691	mmpL5_M624V	BDQ	3	nan	mmpL5_M624V	mmpL5	p.Met624Val	False
1692	mmpL5_M655T	BDQ	3	nan	mmpL5_M655T	mmpL5	p.Met655Thr	False
1693	mmpL5_M892I	BDQ	3	nan	mmpL5_M892I	mmpL5	p.Met892Ile	False
1694	mmpL5_M892T	BDQ	3	nan	mmpL5_M892T	mmpL5	p.Met892Thr	False
1695	mmpL5_N458D	BDQ	3	nan	mmpL5_N458D	mmpL5	p.Asn458Asp	False
1696	mmpL5_N466S	BDQ	3	nan	mmpL5_N466S	mmpL5	p.Asn466Ser	False
1697	mmpL5_P179T	BDQ	3	nan	mmpL5_P179T	mmpL5	p.Pro179Thr	False
1698	mmpL5_P445L	BDQ	3	nan	mmpL5_P445L	mmpL5	p.Pro445Leu	False
1699	mmpL5_P927R	BDQ	3	nan	mmpL5_P927R	mmpL5	p.Pro927Arg	False
1700	mmpL5_P947S	BDQ	3	nan	mmpL5_P947S	mmpL5	p.Pro947Ser	False
1701	mmpL5_P953S	BDQ	3	nan	mmpL5_P953S	mmpL5	p.Pro953Ser	False
1702	mmpL5_Q333E	BDQ	3	nan	mmpL5_Q333E	mmpL5	p.Gln333Glu	False
1703	mmpL5_Q504!	BDQ	3	nan	mmpL5_Q504!	mmpL5	p.Gln504*	False
1704	mmpL5_Q60!	BDQ	3	nan	mmpL5_Q60!	mmpL5	p.Gln60*	False
1705	mmpL5_Q702!	BDQ	3	nan	mmpL5_Q702!	mmpL5	p.Gln702*	False
1706	mmpL5_Q707K	BDQ	3	nan	mmpL5_Q707K	mmpL5	p.Gln707Lys	False
1707	mmpL5_R244L	BDQ	3	nan	mmpL5_R244L	mmpL5	p.Arg244Leu	False
1708	mmpL5_R289H	BDQ	3	nan	mmpL5_R289H	mmpL5	p.Arg289His	False
1709	mmpL5_R380H	BDQ	3	nan	mmpL5_R380H	mmpL5	p.Arg380His	False
1710	mmpL5_S125C	BDQ	3	nan	mmpL5_S125C	mmpL5	p.Ser125Cys	False
1711	mmpL5_S439A	BDQ	3	nan	mmpL5_S439A	mmpL5	p.Ser439Ala	False
1712	mmpL5_S541R	BDQ	3	nan	mmpL5_S541R	mmpL5	p.Ser541Arg	False
1713	mmpL5_S583N	BDQ	3	nan	mmpL5_S583N	mmpL5	p.Ser583Asn	False
1714	mmpL5_S654T	BDQ	3	nan	mmpL5_S654T	mmpL5	p.Ser654Thr	False
1715	mmpL5_S879L	BDQ	3	nan	mmpL5_S879L	mmpL5	p.Ser879Leu	False
1716	mmpL5_T10A	BDQ	3	nan	mmpL5_T10A	mmpL5	p.Thr10Ala	False
1717	mmpL5_T10S	BDQ	3	nan	mmpL5_T10S	mmpL5	p.Thr10Ser	False
1718	mmpL5_T120A	BDQ	3	nan	mmpL5_T120A	mmpL5	p.Thr120Ala	False
1719	mmpL5_V149I	BDQ	3	nan	mmpL5_V149I	mmpL5	p.Val149Ile	False
1720	mmpL5_V151G	BDQ	3	nan	mmpL5_V151G	mmpL5	p.Val151Gly	False
1721	mmpL5_V222G	BDQ	3	nan	mmpL5_V222G	mmpL5	p.Val222Gly	False
1722	mmpL5_V268M	BDQ	3	nan	mmpL5_V268M	mmpL5	p.Val268Met	False
1723	mmpL5_V346A	BDQ	3	nan	mmpL5_V346A	mmpL5	p.Val346Ala	False
1724	mmpL5_V360M	BDQ	3	nan	mmpL5_V360M	mmpL5	p.Val360Met	False
1725	mmpL5_V464M	BDQ	3	nan	mmpL5_V464M	mmpL5	p.Val464Met	False
1726	mmpL5_V481M	BDQ	3	nan	mmpL5_V481M	mmpL5	p.Val481Met	False
1727	mmpL5_V612G	BDQ	3	nan	mmpL5_V612G	mmpL5	p.Val612Gly	False
1728	mmpL5_V612I	BDQ	3	nan	mmpL5_V612I	mmpL5	p.Val612Ile	False
1729	mmpL5_V846I	BDQ	3	nan	mmpL5_V846I	mmpL5	p.Val846Ile	False
1730	mmpL5_V942I	BDQ	3	nan	mmpL5_V942I	mmpL5	p.Val942Ile	False
1731	mmpL5_V964L	BDQ	3	nan	mmpL5_V964L	mmpL5	p.Val964Leu	False
1732	mmpL5_W598G	BDQ	3	nan	mmpL5_W598G	mmpL5	p.Trp598Gly	False
1733	mmpL5_W823R	BDQ	3	nan	mmpL5_W823R	mmpL5	p.Trp823Arg	False
1734	mmpL5_W938R	BDQ	3	nan	mmpL5_W938R	mmpL5	p.Trp938Arg	False
1735	mmpL5_W952L	BDQ	3	nan	mmpL5_W952L	mmpL5	p.Trp952Leu	False
1736	mmpL5_Y185!	BDQ	3	nan	mmpL5_Y185!	mmpL5	p.Tyr185*	False
1737	mmpL5_Y299C	BDQ	3	nan	mmpL5_Y299C	mmpL5	p.Tyr299Cys	False
1738	mmpL5_Y411D	BDQ	3	nan	mmpL5_Y411D	mmpL5	p.Tyr411Asp	False
1739	mmpL5_Y514C	BDQ	3	nan	mmpL5_Y514C	mmpL5	p.Tyr514Cys	False
1740	mmpS5_135_del_2_ggc_g	BDQ	3	778771	mmpS5_135_del_2_ggc_g	mmpS5	c.133_134del	False
1741	mmpS5_355_del_1_cg_c	BDQ	3	778551	mmpS5_355_del_1_cg_c	mmpS5	c.354del	False
1742	mmpS5_367_ins_1_t_ta	BDQ	3	778539	mmpS5_367_ins_1_t_ta	mmpS5	c.366_367insT	False
1743	mmpS5_38_ins_1_a_at	BDQ	3	778868	mmpS5_38_ins_1_a_at	mmpS5	c.37_38insA	False
1744	mmpS5_393_ins_9_c_cacgccggtt	BDQ	3	778513	mmpS5_393_ins_9_c_cacgccggtt	mmpS5	c.392_393insAACCGGCGT	False
1745	mmpS5_-64_ins_3_t_tttc	BDQ	3	778969	mmpS5_-64_ins_3_t_tttc	mmpS5	c.-65_-64insGAA	False
1746	mmpS5_-7_del_2_ccg_c	BDQ	3	778912	mmpS5_-7_del_2_ccg_c	mmpS5	c.-9_-8del	False
1747	mmpS5_A133V	BDQ	3	nan	mmpS5_A133V	mmpS5	p.Ala133Val	False
1748	mmpS5_a-14c	BDQ	3	778919	mmpS5_a-14c	mmpS5	c.-14A>C	False
1749	mmpS5_a-65g	BDQ	3	778970	mmpS5_a-65g	mmpS5	c.-65A>G	False
1750	mmpS5_C114S	BDQ	3	nan	mmpS5_C114S	mmpS5	p.Cys114Ser	False
1751	mmpS5_c-22t	BDQ	3	778927	mmpS5_c-22t	mmpS5	c.-22C>T	False
1752	mmpS5_c-56t	BDQ	3	778961	mmpS5_c-56t	mmpS5	c.-56C>T	False
1753	mmpS5_c-71t	BDQ	3	778976	mmpS5_c-71t	mmpS5	c.-71C>T	False
1754	mmpS5_G130D	BDQ	3	nan	mmpS5_G130D	mmpS5	p.Gly130Asp	False
1755	mmpS5_g-19a	BDQ	3	778924	mmpS5_g-19a	mmpS5	c.-19G>A	False
1756	mmpS5_g-51a	BDQ	3	778956	mmpS5_g-51a	mmpS5	c.-51G>A	False
1757	mmpS5_g-55c	BDQ	3	778960	mmpS5_g-55c	mmpS5	c.-55G>C	False
1758	mmpS5_g-60a	BDQ	3	778965	mmpS5_g-60a	mmpS5	c.-60G>A	False
1759	mmpS5_g-82t	BDQ	3	778987	mmpS5_g-82t	mmpS5	c.-82G>T	False
1760	mmpS5_I116L	BDQ	3	nan	mmpS5_I116L	mmpS5	p.Ile116Leu	False
1761	mmpS5_K42R	BDQ	3	nan	mmpS5_K42R	mmpS5	p.Lys42Arg	False
1762	mmpS5_P101R	BDQ	3	nan	mmpS5_P101R	mmpS5	p.Pro101Arg	False
1763	mmpS5_P53L	BDQ	3	nan	mmpS5_P53L	mmpS5	p.Pro53Leu	False
1764	mmpS5_T113N	BDQ	3	nan	mmpS5_T113N	mmpS5	p.Thr113Asn	False
1765	mmpS5_T24A	BDQ	3	nan	mmpS5_T24A	mmpS5	p.Thr24Ala	False
1766	mmpS5_T4I	BDQ	3	nan	mmpS5_T4I	mmpS5	p.Thr4Ile	False
1767	mmpS5_V55M	BDQ	3	nan	mmpS5_V55M	mmpS5	p.Val55Met	False
1768	mmpS5_V56M	BDQ	3	nan	mmpS5_V56M	mmpS5	p.Val56Met	False
1769	pepQ_299_ins_1_t_tg	BDQ	3	2860120	pepQ_299_ins_1_t_tg	pepQ	c.298_299insC	False
1770	pepQ_A137S	BDQ	3	nan	pepQ_A137S	pepQ	p.Ala137Ser	False
1771	pepQ_A153G	BDQ	3	nan	pepQ_A153G	pepQ	p.Ala153Gly	False
1772	pepQ_A263V	BDQ	3	nan	pepQ_A263V	pepQ	p.Ala263Val	False
1773	pepQ_A370V	BDQ	3	nan	pepQ_A370V	pepQ	p.Ala370Val	False
1774	pepQ_D108N	BDQ	3	nan	pepQ_D108N	pepQ	p.Asp108Asn	False
1775	pepQ_D209E	BDQ	3	nan	pepQ_D209E	pepQ	p.Asp209Glu	False
1776	pepQ_D26A	BDQ	3	nan	pepQ_D26A	pepQ	p.Asp26Ala	False
1777	pepQ_D26G	BDQ	3	nan	pepQ_D26G	pepQ	p.Asp26Gly	False
1778	pepQ_E177D	BDQ	3	nan	pepQ_E177D	pepQ	p.Glu177Asp	False
1779	pepQ_E89D	BDQ	3	nan	pepQ_E89D	pepQ	p.Glu89Asp	False
1780	pepQ_G85C	BDQ	3	nan	pepQ_G85C	pepQ	p.Gly85Cys	False
1781	pepQ_I24T	BDQ	3	nan	pepQ_I24T	pepQ	p.Ile24Thr	False
1782	pepQ_I28R	BDQ	3	nan	pepQ_I28R	pepQ	p.Ile28Arg	False
1783	pepQ_K94N	BDQ	3	nan	pepQ_K94N	pepQ	p.Lys94Asn	False
1784	pepQ_L107R	BDQ	3	nan	pepQ_L107R	pepQ	p.Leu107Arg	False
1785	pepQ_M180T	BDQ	3	nan	pepQ_M180T	pepQ	p.Met180Thr	False
1786	pepQ_M180V	BDQ	3	nan	pepQ_M180V	pepQ	p.Met180Val	False
1787	pepQ_N118D	BDQ	3	nan	pepQ_N118D	pepQ	p.Asn118Asp	False
1788	pepQ_P165Q	BDQ	3	nan	pepQ_P165Q	pepQ	p.Pro165Gln	False
1789	pepQ_R170W	BDQ	3	nan	pepQ_R170W	pepQ	p.Arg170Trp	False
1790	pepQ_S130L	BDQ	3	nan	pepQ_S130L	pepQ	p.Ser130Leu	False
1791	pepQ_S66L	BDQ	3	nan	pepQ_S66L	pepQ	p.Ser66Leu	False
1792	pepQ_S99R	BDQ	3	nan	pepQ_S99R	pepQ	p.Ser99Arg	False
1793	pepQ_T354A	BDQ	3	nan	pepQ_T354A	pepQ	p.Thr354Ala	False
1794	pepQ_V101L	BDQ	3	nan	pepQ_V101L	pepQ	p.Val101Leu	False
1795	pepQ_V1M	BDQ	3	nan	pepQ_V1M	pepQ	p.Val1Met	False
1796	pepQ_V324M	BDQ	3	nan	pepQ_V324M	pepQ	p.Val324Met	False
1797	pepQ_V343A	BDQ	3	nan	pepQ_V343A	pepQ	p.Val343Ala	False
1798	Rv0678_132_ins_2_ggtgt_ggtgtgt	BDQ	3	779121	Rv0678_132_ins_2_ggtgt_ggtgtgt	Rv0678	c.132_133insGT|c.133_134insTG|c.134_135insGT|c.135_136insTG|c.136_137insGT	False
1799	Rv0678_146_ins_3_a_agcg	BDQ	3	779135	Rv0678_146_ins_3_a_agcg	Rv0678	c.146_147insGCG	False
1800	Rv0678_18_del_3_ggtc_g	BDQ	3	779007	Rv0678_18_del_3_ggtc_g	Rv0678	c.19_21del	False
1801	Rv0678_211_del_1_gc_g	BDQ	3	779200	Rv0678_211_del_1_gc_g	Rv0678	c.212del	False
1802	Rv0678_29_del_1_tg_t	BDQ	3	779018	Rv0678_29_del_1_tg_t	Rv0678	c.30del	False
1803	Rv0678_371_del_1_cg_c	BDQ	3	779360	Rv0678_371_del_1_cg_c	Rv0678	c.372del	False
1804	Rv0678_401_del_12_gacggctgcggga_g	BDQ	3	779390	Rv0678_401_del_12_gacggctgcggga_g	Rv0678	c.402_413del	False
1805	Rv0678_418_ins_1_cgggatctgtt_cggggatctgtt	BDQ	3	779407	Rv0678_418_ins_1_cgggatctgtt_cggggatctgtt	Rv0678	c.418_419insG|c.419_420insG|c.420_421insG|c.421_422insG	False
1806	Rv0678_465_ins_1_g_gc	BDQ	3	779454	Rv0678_465_ins_1_g_gc	Rv0678	c.465_466insC	False
1807	Rv0678_492_ins_2_c_cga	BDQ	3	779481	Rv0678_492_ins_2_c_cga	Rv0678	c.492_493insGA	False
1808	Rv0678_A101E	BDQ	3	nan	Rv0678_A101E	Rv0678	p.Ala101Glu	False
1809	Rv0678_A59V	BDQ	3	nan	Rv0678_A59V	Rv0678	p.Ala59Val	False
1810	Rv0678_A62T	BDQ	3	nan	Rv0678_A62T	Rv0678	p.Ala62Thr	False
1811	Rv0678_C46G	BDQ	3	nan	Rv0678_C46G	Rv0678	p.Cys46Gly	False
1812	Rv0678_C46R	BDQ	3	nan	Rv0678_C46R	Rv0678	p.Cys46Arg	False
1813	Rv0678_D5G	BDQ	3	nan	Rv0678_D5G	Rv0678	p.Asp5Gly	False
1814	Rv0678_D8G	BDQ	3	nan	Rv0678_D8G	Rv0678	p.Asp8Gly	False
1815	Rv0678_E104G	BDQ	3	nan	Rv0678_E104G	Rv0678	p.Glu104Gly	False
1816	Rv0678_E113K	BDQ	3	nan	Rv0678_E113K	Rv0678	p.Glu113Lys	False
1817	Rv0678_E21K	BDQ	3	nan	Rv0678_E21K	Rv0678	p.Glu21Lys	False
1818	Rv0678_G25C	BDQ	3	nan	Rv0678_G25C	Rv0678	p.Gly25Cys	False
1819	Rv0678_G87R	BDQ	3	nan	Rv0678_G87R	Rv0678	p.Gly87Arg	False
1820	Rv0678_I80M	BDQ	3	nan	Rv0678_I80M	Rv0678	p.Ile80Met	False
1821	Rv0678_I80S	BDQ	3	nan	Rv0678_I80S	Rv0678	p.Ile80Ser	False
1822	Rv0678_L32S	BDQ	3	nan	Rv0678_L32S	Rv0678	p.Leu32Ser	False
1823	Rv0678_L40S	BDQ	3	nan	Rv0678_L40S	Rv0678	p.Leu40Ser	False
1824	Rv0678_L74M	BDQ	3	nan	Rv0678_L74M	Rv0678	p.Leu74Met	False
1825	Rv0678_L74V	BDQ	3	nan	Rv0678_L74V	Rv0678	p.Leu74Val	False
1826	Rv0678_L83P	BDQ	3	nan	Rv0678_L83P	Rv0678	p.Leu83Pro	False
1827	Rv0678_M10I	BDQ	3	nan	Rv0678_M10I	Rv0678	p.Met10Ile	False
1828	Rv0678_M17V	BDQ	3	nan	Rv0678_M17V	Rv0678	p.Met17Val	False
1829	Rv0678_N70D	BDQ	3	nan	Rv0678_N70D	Rv0678	p.Asn70Asp	False
1830	Rv0678_P14L	BDQ	3	nan	Rv0678_P14L	Rv0678	p.Pro14Leu	False
1831	Rv0678_P14S	BDQ	3	nan	Rv0678_P14S	Rv0678	p.Pro14Ser	False
1832	Rv0678_Q115!	BDQ	3	nan	Rv0678_Q115!	Rv0678	p.Gln115*	False
1833	Rv0678_Q22R	BDQ	3	nan	Rv0678_Q22R	Rv0678	p.Gln22Arg	False
1834	Rv0678_Q51K	BDQ	3	nan	Rv0678_Q51K	Rv0678	p.Gln51Lys	False
1835	Rv0678_R107C	BDQ	3	nan	Rv0678_R107C	Rv0678	p.Arg107Cys	False
1836	Rv0678_R109Q	BDQ	3	nan	Rv0678_R109Q	Rv0678	p.Arg109Gln	False
1837	Rv0678_R156Q	BDQ	3	nan	Rv0678_R156Q	Rv0678	p.Arg156Gln	False
1838	Rv0678_R38!	BDQ	3	nan	Rv0678_R38!	Rv0678	p.Arg38*	False
1839	Rv0678_R50Q	BDQ	3	nan	Rv0678_R50Q	Rv0678	p.Arg50Gln	False
1840	Rv0678_R72W	BDQ	3	nan	Rv0678_R72W	Rv0678	p.Arg72Trp	False
1841	Rv0678_R94W	BDQ	3	nan	Rv0678_R94W	Rv0678	p.Arg94Trp	False
1842	Rv0678_R96G	BDQ	3	nan	Rv0678_R96G	Rv0678	p.Arg96Gly	False
1843	Rv0678_R96L	BDQ	3	nan	Rv0678_R96L	Rv0678	p.Arg96Leu	False
1844	Rv0678_R96W	BDQ	3	nan	Rv0678_R96W	Rv0678	p.Arg96Trp	False
1845	Rv0678_S158R	BDQ	3	nan	Rv0678_S158R	Rv0678	p.Ser158Arg	False
1846	Rv0678_S2I	BDQ	3	nan	Rv0678_S2I	Rv0678	p.Ser2Ile	False
1847	Rv0678_S52P	BDQ	3	nan	Rv0678_S52P	Rv0678	p.Ser52Pro	False
1848	Rv0678_S68G	BDQ	3	nan	Rv0678_S68G	Rv0678	p.Ser68Gly	False
1849	Rv0678_S68I	BDQ	3	nan	Rv0678_S68I	Rv0678	p.Ser68Ile	False
1850	Rv0678_T58P	BDQ	3	nan	Rv0678_T58P	Rv0678	p.Thr58Pro	False
1851	Rv0678_V20A	BDQ	3	nan	Rv0678_V20A	Rv0678	p.Val20Ala	False
1852	Rv0678_V85A	BDQ	3	nan	Rv0678_V85A	Rv0678	p.Val85Ala	False
1853	Rv0678_W42R	BDQ	3	nan	Rv0678_W42R	Rv0678	p.Trp42Arg	False
1854	Rv0678_Y26C	BDQ	3	nan	Rv0678_Y26C	Rv0678	p.Tyr26Cys	False
1855	Rv1979c_-110_del_1_tg_t	BDQ	3	2223274	Rv1979c_-110_del_1_tg_t	Rv1979c	c.-111del	False
1856	Rv1979c_-12_ins_1_t_tg	BDQ	3	2223176	Rv1979c_-12_ins_1_t_tg	Rv1979c	c.-13_-12insC	False
1857	Rv1979c_1303_ins_1_ggtagtcgtaggacactgccagcccaacc_ggtagtcgtaggacactgcccagcccaacc	BDQ	3	2221862	Rv1979c_1303_ins_1_ggtagtcgtaggacactgccagcccaacc_ggtagtcgtaggacactgcccagcccaacc	Rv1979c	c.1285_1286insG|c.1284_1285insG|c.1283_1284insG	False
1858	Rv1979c_-216_del_18_aatacctgggttgggccgg_a	BDQ	3	2223380	Rv1979c_-216_del_18_aatacctgggttgggccgg_a (mpt64_650)	Rv1979c	c.-234_-217del	False
1859	Rv1979c_-252_ins_1_t_tc	BDQ	3	2223416	Rv1979c_-252_ins_1_t_tc (mpt64_614)	Rv1979c	c.-253_-252insG	False
1860	Rv1979c_301_del_3_taatg_ta	BDQ	3	2222864	Rv1979c_301_del_3_taatg_ta	Rv1979c	c.297_299del	False
1861	Rv1979c_-353_del_8_tccggtctg_a	BDQ	3	2223517	Rv1979c_-353_del_8_tccggtctg_a (mpt64_513)			True
1862	Rv1979c_385_del_1_cg_c	BDQ	3	2222780	Rv1979c_385_del_1_cg_c	Rv1979c	c.384del	False
1863	Rv1979c_550_del_10_tccacagcccg_t	BDQ	3	2222615	Rv1979c_550_del_10_tccacagcccg_t	Rv1979c	c.540_549del	False
1864	Rv1979c_560_del_5_gtggtgatga_gtggt	BDQ	3	2222605	Rv1979c_560_del_5_gtggtgatga_gtggt	Rv1979c	c.551_555del	False
1865	Rv1979c_718_del_1_tc_t	BDQ	3	2222447	Rv1979c_718_del_1_tc_t	Rv1979c	c.717del	False
1866	Rv1979c_A105D	BDQ	3	nan	Rv1979c_A105D	Rv1979c	p.Ala105Asp	False
1867	Rv1979c_A10V	BDQ	3	nan	Rv1979c_A10V	Rv1979c	p.Ala10Val	False
1868	Rv1979c_A126T	BDQ	3	nan	Rv1979c_A126T	Rv1979c	p.Ala126Thr	False
1869	Rv1979c_a-130c	BDQ	3	2223294	Rv1979c_a-130c	Rv1979c	c.-130A>C	False
1870	Rv1979c_a-178c	BDQ	3	2223342	Rv1979c_a-178c	Rv1979c	c.-178A>C	False
1871	Rv1979c_A202S	BDQ	3	nan	Rv1979c_A202S	Rv1979c	p.Ala202Ser	False
1872	Rv1979c_a-218g	BDQ	3	2223382	Rv1979c_a-218g (mpt64_216)	Rv1979c	c.-218A>G	False
1873	Rv1979c_a-236c	BDQ	3	2223400	Rv1979c_a-236c (mpt64_210)	Rv1979c	c.-236A>C	False
1874	Rv1979c_A247T	BDQ	3	nan	Rv1979c_A247T	Rv1979c	p.Ala247Thr	False
1875	Rv1979c_A259E	BDQ	3	nan	Rv1979c_A259E	Rv1979c	p.Ala259Glu	False
1876	Rv1979c_a-26c	BDQ	3	2223190	Rv1979c_a-26c	Rv1979c	c.-26A>C	False
1877	Rv1979c_a-378g	BDQ	3	2223542	Rv1979c_a-378g (mpt64_163)	Rv1979c	c.-378A>G	False
1878	Rv1979c_A378T	BDQ	3	nan	Rv1979c_A378T	Rv1979c	p.Ala378Thr	False
1879	Rv1979c_a-398g	BDQ	3	2223562	Rv1979c_a-398g (mpt64_156)	Rv1979c	c.-398A>G	False
1880	Rv1979c_A405P	BDQ	3	nan	Rv1979c_A405P	Rv1979c	p.Ala405Pro	False
1881	Rv1979c_a-447c	BDQ	3	2223611	Rv1979c_a-447c (mpt64_140)	Rv1979c	c.-447A>C	False
1882	Rv1979c_A47T	BDQ	3	nan	Rv1979c_A47T	Rv1979c	p.Ala47Thr	False
1883	Rv1979c_A50T	BDQ	3	nan	Rv1979c_A50T	Rv1979c	p.Ala50Thr	False
1884	Rv1979c_a-59g	BDQ	3	2223223	Rv1979c_a-59g	Rv1979c	c.-59A>G	False
1885	Rv1979c_A62T	BDQ	3	nan	Rv1979c_A62T	Rv1979c	p.Ala62Thr	False
1886	Rv1979c_A66S	BDQ	3	nan	Rv1979c_A66S	Rv1979c	p.Ala66Ser	False
1887	Rv1979c_A84T	BDQ	3	nan	Rv1979c_A84T	Rv1979c	p.Ala84Thr	False
1888	Rv1979c_c-18t	BDQ	3	2223182	Rv1979c_c-18t	Rv1979c	c.-18C>T	False
1889	Rv1979c_c-208g	BDQ	3	2223372	Rv1979c_c-208g (mpt64_220)	Rv1979c	c.-208C>G	False
1890	Rv1979c_c-299t	BDQ	3	2223463	Rv1979c_c-299t (mpt64_189)	Rv1979c	c.-299C>T	False
1891	Rv1979c_c-356g	BDQ	3	2223520	Rv1979c_c-356g (mpt64_170)	Rv1979c	c.-356C>G	False
1892	Rv1979c_c-411g	BDQ	3	2223575	Rv1979c_c-411g (mpt64_152)	Rv1979c	c.-411C>G	False
1893	Rv1979c_c-96t	BDQ	3	2223260	Rv1979c_c-96t	Rv1979c	c.-96C>T	False
1894	Rv1979c_F122L	BDQ	3	nan	Rv1979c_F122L	Rv1979c	p.Phe122Leu	False
1895	Rv1979c_F300V	BDQ	3	nan	Rv1979c_F300V	Rv1979c	p.Phe300Val	False
1896	Rv1979c_F386V	BDQ	3	nan	Rv1979c_F386V	Rv1979c	p.Phe386Val	False
1897	Rv1979c_g-107a	BDQ	3	2223271	Rv1979c_g-107a	Rv1979c	c.-107G>A	False
1898	Rv1979c_g-123t	BDQ	3	2223287	Rv1979c_g-123t	Rv1979c	c.-123G>T	False
1899	Rv1979c_g-125c	BDQ	3	2223289	Rv1979c_g-125c	Rv1979c	c.-125G>C	False
1900	Rv1979c_g-19a	BDQ	3	2223183	Rv1979c_g-19a	Rv1979c	c.-19G>A	False
1901	Rv1979c_G216D	BDQ	3	nan	Rv1979c_G216D	Rv1979c	p.Gly216Asp	False
1902	Rv1979c_g-241a	BDQ	3	2223405	Rv1979c_g-241a (mpt64_209)	Rv1979c	c.-241G>A	False
1903	Rv1979c_g-255a	BDQ	3	2223419	Rv1979c_g-255a (mpt64_204)	Rv1979c	c.-255G>A	False
1904	Rv1979c_g-275a	BDQ	3	2223439	Rv1979c_g-275a (mpt64_197)	Rv1979c	c.-275G>A	False
1905	Rv1979c_g-277t	BDQ	3	2223441	Rv1979c_g-277t (mpt64_197)	Rv1979c	c.-277G>T	False
1906	Rv1979c_g-279a	BDQ	3	2223443	Rv1979c_g-279a (mpt64_196)	Rv1979c	c.-279G>A	False
1907	Rv1979c_g-280a	BDQ	3	2223444	Rv1979c_g-280a (mpt64_196)	Rv1979c	c.-280G>A	False
1908	Rv1979c_g-328t	BDQ	3	2223492	Rv1979c_g-328t (mpt64_180)	Rv1979c	c.-328G>T	False
1909	Rv1979c_H12Y	BDQ	3	nan	Rv1979c_H12Y	Rv1979c	p.His12Tyr	False
1910	Rv1979c_H404Y	BDQ	3	nan	Rv1979c_H404Y	Rv1979c	p.His404Tyr	False
1911	Rv1979c_I226T	BDQ	3	nan	Rv1979c_I226T	Rv1979c	p.Ile226Thr	False
1912	Rv1979c_I238T	BDQ	3	nan	Rv1979c_I238T	Rv1979c	p.Ile238Thr	False
1913	Rv1979c_I256T	BDQ	3	nan	Rv1979c_I256T	Rv1979c	p.Ile256Thr	False
1914	Rv1979c_I394T	BDQ	3	nan	Rv1979c_I394T	Rv1979c	p.Ile394Thr	False
1915	Rv1979c_L229S	BDQ	3	nan	Rv1979c_L229S	Rv1979c	p.Leu229Ser	False
1916	Rv1979c_L330V	BDQ	3	nan	Rv1979c_L330V	Rv1979c	p.Leu330Val	False
1917	Rv1979c_L419F	BDQ	3	nan	Rv1979c_L419F	Rv1979c	p.Leu419Phe	False
1918	Rv1979c_M275T	BDQ	3	nan	Rv1979c_M275T	Rv1979c	p.Met275Thr	False
1919	Rv1979c_N297S	BDQ	3	nan	Rv1979c_N297S	Rv1979c	p.Asn297Ser	False
1920	Rv1979c_P460L	BDQ	3	nan	Rv1979c_P460L	Rv1979c	p.Pro460Leu	False
1921	Rv1979c_P4A	BDQ	3	nan	Rv1979c_P4A	Rv1979c	p.Pro4Ala	False
1922	Rv1979c_Q385!	BDQ	3	nan	Rv1979c_Q385!	Rv1979c	p.Gln385*	False
1923	Rv1979c_R88L	BDQ	3	nan	Rv1979c_R88L	Rv1979c	p.Arg88Leu	False
1924	Rv1979c_S206L	BDQ	3	nan	Rv1979c_S206L	Rv1979c	p.Ser206Leu	False
1925	Rv1979c_S219A	BDQ	3	nan	Rv1979c_S219A	Rv1979c	p.Ser219Ala	False
1926	Rv1979c_S237L	BDQ	3	nan	Rv1979c_S237L	Rv1979c	p.Ser237Leu	False
1927	Rv1979c_t-250g	BDQ	3	2223414	Rv1979c_t-250g (mpt64_206)	Rv1979c	c.-250T>G	False
1928	Rv1979c_t-265g	BDQ	3	2223429	Rv1979c_t-265g (mpt64_201)	Rv1979c	c.-265T>G	False
1929	Rv1979c_t-291c	BDQ	3	2223455	Rv1979c_t-291c (mpt64_192)	Rv1979c	c.-291T>C	False
1930	Rv1979c_t-345c	BDQ	3	2223509	Rv1979c_t-345c (mpt64_174)	Rv1979c	c.-345T>C	False
1931	Rv1979c_t-426g	BDQ	3	2223590	Rv1979c_t-426g (mpt64_147)	Rv1979c	c.-426T>G	False
1932	Rv1979c_t-44g	BDQ	3	2223208	Rv1979c_t-44g	Rv1979c	c.-44T>G	False
1933	Rv1979c_t-452c	BDQ	3	2223616	Rv1979c_t-452c (mpt64_138)	Rv1979c	c.-452T>C	False
1934	Rv1979c_V136L	BDQ	3	nan	Rv1979c_V136L	Rv1979c	p.Val136Leu	False
1935	Rv1979c_V190A	BDQ	3	nan	Rv1979c_V190A	Rv1979c	p.Val190Ala	False
1936	Rv1979c_V1L	BDQ	3	nan	Rv1979c_V1L	Rv1979c	p.Val1Leu	False
1937	Rv1979c_V1V	BDQ	3	nan	Rv1979c_V1V	Rv1979c	p.Val1Val	False
1938	Rv1979c_V210F	BDQ	3	nan	Rv1979c_V210F	Rv1979c	p.Val210Phe	False
1939	Rv1979c_V384I	BDQ	3	nan	Rv1979c_V384I	Rv1979c	p.Val384Ile	False
1940	Rv1979c_V416A	BDQ	3	nan	Rv1979c_V416A	Rv1979c	p.Val416Ala	False
1941	Rv1979c_V423L	BDQ	3	nan	Rv1979c_V423L	Rv1979c	p.Val423Leu	False
1942	Rv1979c_V459I	BDQ	3	nan	Rv1979c_V459I	Rv1979c	p.Val459Ile	False
1943	Rv1979c_V96I	BDQ	3	nan	Rv1979c_V96I	Rv1979c	p.Val96Ile	False
1944	Rv1979c_W106!	BDQ	3	nan	Rv1979c_W106!	Rv1979c	p.Trp106*	False
1945	Rv1979c_Y79C	BDQ	3	nan	Rv1979c_Y79C	Rv1979c	p.Tyr79Cys	False
1946	mmpL5_2208_ins_9_g_ggcgatgcgc	BDQ	3	776273	mmpL5_2208_ins_9_g_ggcgatgcgc	mmpL5	c.2207_2208insGCGCATCGC	False
1947	mmpL5_2754_del_2_ggt_g	BDQ	3	775727	mmpL5_2754_del_2_ggt_g	mmpL5	c.2752_2753del	False
1948	mmpL5_347_del_2_agt_a	BDQ	3	778134	mmpL5_347_del_2_agt_a	mmpL5	c.345_346del	False
1949	mmpL5_851_del_1_cg_c	BDQ	3	777630	mmpL5_851_del_1_cg_c	mmpL5	c.850del	False
1950	mmpL5_A230V	BDQ	3	nan	mmpL5_A230V	mmpL5	p.Ala230Val	False
1951	mmpL5_A359T	BDQ	3	nan	mmpL5_A359T	mmpL5	p.Ala359Thr	False
1952	mmpL5_A896T	BDQ	3	nan	mmpL5_A896T	mmpL5	p.Ala896Thr	False
1953	mmpL5_D424N	BDQ	3	nan	mmpL5_D424N	mmpL5	p.Asp424Asn	False
1954	mmpL5_D455G	BDQ	3	nan	mmpL5_D455G	mmpL5	p.Asp455Gly	False
1955	mmpL5_G396C	BDQ	3	nan	mmpL5_G396C	mmpL5	p.Gly396Cys	False
1956	mmpL5_G477R	BDQ	3	nan	mmpL5_G477R	mmpL5	p.Gly477Arg	False
1957	mmpL5_G609R	BDQ	3	nan	mmpL5_G609R	mmpL5	p.Gly609Arg	False
1958	mmpL5_H122R	BDQ	3	nan	mmpL5_H122R	mmpL5	p.His122Arg	False
1959	mmpL5_H590P	BDQ	3	nan	mmpL5_H590P	mmpL5	p.His590Pro	False
1960	mmpL5_I732V	BDQ	3	nan	mmpL5_I732V	mmpL5	p.Ile732Val	False
1961	mmpL5_M645I	BDQ	3	nan	mmpL5_M645I	mmpL5	p.Met645Ile	False
1962	mmpL5_M666I	BDQ	3	nan	mmpL5_M666I	mmpL5	p.Met666Ile	False
1963	mmpL5_M892V	BDQ	3	nan	mmpL5_M892V	mmpL5	p.Met892Val	False
1964	mmpL5_M903I	BDQ	3	nan	mmpL5_M903I	mmpL5	p.Met903Ile	False
1965	mmpL5_N772S	BDQ	3	nan	mmpL5_N772S	mmpL5	p.Asn772Ser	False
1966	mmpL5_S782A	BDQ	3	nan	mmpL5_S782A	mmpL5	p.Ser782Ala	False
1967	mmpL5_T606A	BDQ	3	nan	mmpL5_T606A	mmpL5	p.Thr606Ala	False
1968	mmpL5_V382A	BDQ	3	nan	mmpL5_V382A	mmpL5	p.Val382Ala	False
1969	mmpL5_W833!	BDQ	3	nan	mmpL5_W833!	mmpL5	p.Trp833*	False
1970	mmpL5_W936R	BDQ	3	nan	mmpL5_W936R	mmpL5	p.Trp936Arg	False
1971	mmpS5_A133T	BDQ	3	nan	mmpS5_A133T	mmpS5	p.Ala133Thr	False
1972	mmpS5_A8V	BDQ	3	nan	mmpS5_A8V	mmpS5	p.Ala8Val	False
1973	mmpS5_c-31g	BDQ	3	778936	mmpS5_c-31g	mmpS5	c.-31C>G	False
1974	mmpS5_D82E	BDQ	3	nan	mmpS5_D82E	mmpS5	p.Asp82Glu	False
1975	mmpS5_G109D	BDQ	3	nan	mmpS5_G109D	mmpS5	p.Gly109Asp	False
1976	mmpS5_G109S	BDQ	3	nan	mmpS5_G109S	mmpS5	p.Gly109Ser	False
1977	mmpS5_G130R	BDQ	3	nan	mmpS5_G130R	mmpS5	p.Gly130Arg	False
1978	mmpS5_R29L	BDQ	3	nan	mmpS5_R29L	mmpS5	p.Arg29Leu	False
1979	mmpS5_S98P	BDQ	3	nan	mmpS5_S98P	mmpS5	p.Ser98Pro	False
1980	mmpS5_T4P	BDQ	3	nan	mmpS5_T4P	mmpS5	p.Thr4Pro	False
1981	mmpS5_V67G	BDQ	3	nan	mmpS5_V67G	mmpS5	p.Val67Gly	False
1982	pepQ_A305V	BDQ	3	nan	pepQ_A305V	pepQ	p.Ala305Val	False
1983	pepQ_T341A	BDQ	3	nan	pepQ_T341A	pepQ	p.Thr341Ala	False
1984	pepQ_V104L	BDQ	3	nan	pepQ_V104L	pepQ	p.Val104Leu	False
1985	Rv0678_140_ins_2_a_atc	BDQ	3	779129	Rv0678_140_ins_2_a_atc	Rv0678	c.140_141insTC	False
1986	Rv0678_234_ins_1_g_gt	BDQ	3	779223	Rv0678_234_ins_1_g_gt	Rv0678	c.234_235insT	False
1987	Rv0678_G103S	BDQ	3	nan	Rv0678_G103S	Rv0678	p.Gly103Ser	False
1988	Rv0678_G162E	BDQ	3	nan	Rv0678_G162E	Rv0678	p.Gly162Glu	False
1989	Rv0678_I108T	BDQ	3	nan	Rv0678_I108T	Rv0678	p.Ile108Thr	False
1990	Rv0678_M139I	BDQ	3	nan	Rv0678_M139I	Rv0678	p.Met139Ile	False
1991	Rv0678_M23V	BDQ	3	nan	Rv0678_M23V	Rv0678	p.Met23Val	False
1992	Rv0678_N4T	BDQ	3	nan	Rv0678_N4T	Rv0678	p.Asn4Thr	False
1993	Rv0678_Q76E	BDQ	3	nan	Rv0678_Q76E	Rv0678	p.Gln76Glu	False
1994	Rv1979c_339_ins_1_gaaaaaagaa_gaaaaaaagaa	BDQ	3	2222826	Rv1979c_339_ins_1_gaaaaaagaa_gaaaaaaagaa	Rv1979c	c.338_339insT|c.337_338insT|c.336_337insT|c.335_336insT|c.334_335insT|c.333_334insT|c.332_333insT	False
1995	Rv1979c_570_del_7_cacgtgctgg_cac	BDQ	3	2222595	Rv1979c_570_del_7_cacgtgctgg_cac	Rv1979c	c.561_567del	False
1996	Rv1979c_A105T	BDQ	3	nan	Rv1979c_A105T	Rv1979c	p.Ala105Thr	False
1997	Rv1979c_A158T	BDQ	3	nan	Rv1979c_A158T	Rv1979c	p.Ala158Thr	False
1998	Rv1979c_a-168c	BDQ	3	2223332	Rv1979c_a-168c	Rv1979c	c.-168A>C	False
[truncated: 15,357 more rows]
